# Supplementary material for: Post-Translational Regulation via Clp Protease Is Critical for Survival of Mycobacterium tuberculosis
Source: PLoS Pathog. 2014 Mar 6;10(3):e1003994. doi: 10.1371/journal.ppat.1003994 (PMC3946367; doi:10.1371/journal.ppat.1003994)
Supplement: Table S1 — Complete list of proteins identified through quantitative proteomic profiling of P750-clpP1P2DAS Mtb in the presence and absence of ATc. List of all proteins identified through proteomic profiling of P750-clpP1P2DAS Mtb in the presence and absence of ATc are listed with the following data included: NCBI protein accession number, Rv number, Protein definition, Number of peptides identified, Normalized summed TMT intensity for wildtype replicates (Reporter ions 126, 127, 128), Normalized summed TMT intensity for Clp depleted replicates (Reporter ions 129, 130, 131), Average wildtype reporter ion intensity, Average mutant reporter ion intensity, mutant:wildtype ratio, and p-value (as determined by unpaired t-test grouping wildtype and mutant replicates). (XLSX) [file ppat.1003994.s005.xlsx]

## Sheet: ravitb_42412
TABLE S1. Complete list of proteins identified through quantitative proteomic profiling of P750-clpP1P2DAS Mtb in the presence and absence of ATc
NCBI Protein Accession Number	Rv Number	NCBI Annotated Protein Definition	Number Peptides Identified	Normalized Summed Intensity: Reporter 126 (Wildtype, Replicate 1)	Normalized Summed Intensity: Reporter 127 (Wildtype, Replicate 2)	Normalized Summed Intensity: Reporter 128 (Wildtype, Replicate 3)	Normalized Summed Intensity: Reporter 129 (Mutant Replicate 1)	Normalized Summed Intensity: Reporter 130 (Mutant Replicate 2)	Normalized Summed Intensity: Reporter 131 (Mutant Replicate 3)	Average Wildtype Reporter Ion Intensity	Average Mutant Reporter Ion Intensity	Mutant:Wildtype Ratio	p-value (T-test)
NP_052930.1	N/A	TetR-off repressor protein	9	7.58	7.7	7.33	24.96	26.56	25.86	7.53667	25.7933	3.42238	0.000352706
ABD52873.1	N/A	TetR-on repressor protein	18	13.88	18.09	10.85	23.13	14.97	19.08	14.2733	19.06	1.33536	0.204772
ABV03170.1	N/A	aph kanamycin resistance gene	4	18.43	18.12	18.59	15.04	14.93	14.88	18.38	14.95	0.813384	0.000582863
NP_214515.1	Rv0001	chromosomal replication initiation protein, DnaA	8	20.02	19.34	20.37	13.24	13.63	13.41	19.91	13.4267	0.674368	0.000713142
NP_214516.1	Rv0002	DNA polymerase III subunit beta	13	18.4	20.04	17.48	15.08	14.22	14.78	18.64	14.6933	0.788269	0.0246289
NP_214518.1	Rv0004	hypothetical protein Rv0004	2	10.14	8.91	9.25	21.94	25.74	24.02	9.43333	23.9	2.53357	0.00285244
NP_214519.1	Rv0005	DNA gyrase subunit B	50	14.9	15.79	15.34	18.68	17.09	18.2	15.3433	17.99	1.1725	0.0148366
NP_214520.1	Rv0006	DNA gyrase subunit A	11	15.67	15.99	15.97	16.98	17.37	18.02	15.8767	17.4567	1.09952	0.0251197
NP_214523.1	Rv0009	iron-regulated peptidyl-prolyl cis-trans isomerase A	23	17.54	17.47	19.63	14.31	16.15	14.91	18.2133	15.1233	0.830344	0.0286036
NP_214525.1	Rv0011c	putative septation inhibitor protein	8	15.23	14.8	16.35	17.35	18.28	17.99	15.46	17.8733	1.1561	0.0172689
NP_214528.1	Rv0014c	transmembrane serine/threonine-protein kinase B PKNB (protein kinase B) (STPK B)	8	18.89	16.32	17.12	16.9	15.09	15.67	17.4433	15.8867	0.910759	0.176917
NP_214529.1	Rv0015c	transmembrane serine/threonine-protein kinase A PKNA (protein kinase A) (STPK A)	3	17.63	15.2	17.58	16.71	15.77	17.11	16.8033	16.53	0.983733	0.780441
NP_214530.1	Rv0016c	penicillin-binding protein PbpA	5	16.9	15.32	17.09	16.3	17.88	16.52	16.4367	16.9	1.02819	0.56947
NP_214531.1	Rv0017c	cell division protein RodA	2	15.35	16.02	14.48	19.48	15.67	18.99	15.2833	18.0467	1.18081	0.135109
NP_214533.1	Rv0019c	hypothetical protein Rv0019c	2	15.87	14.98	16.1	18.32	18.33	16.4	15.65	17.6833	1.12993	0.0667577
NP_214534.1	Rv0020c	hypothetical protein Rv0020c	1	17.66	17.97	13.47	18.7	14.43	17.76	16.3667	16.9633	1.03646	0.774532
NP_214537.1	Rv0023	transcriptional regulatory protein	1	15.39	17.46	18.53	15.31	16.03	17.29	17.1267	16.21	0.946477	0.45527
NP_214539.1	Rv0025	hypothetical protein Rv0025	1	16.26	14.42	12.5	18	18.27	20.55	14.3933	18.94	1.31589	0.0319482
YP_177686.1	Rv0035	fatty-acid-CoA ligase	1	18.39	21.3	26.62	10.4	10.79	12.5	22.1033	11.23	0.508068	0.0381796
NP_214552.1	Rv0038	hypothetical protein Rv0038	3	11	11.4	13.97	19.45	22.52	21.66	12.1233	21.21	1.74952	0.00223594
NP_214555.1	Rv0041	leucyl-tRNA synthetase	14	15.32	15.88	17.05	18.48	14.88	18.38	16.0833	17.2467	1.07233	0.439459
NP_214556.1	Rv0042c	MarR family transcriptional regulator	1	16.08	15.02	12.23	20.65	9.15	26.86	14.4433	18.8867	1.30764	0.48416
NP_214557.1	Rv0043c	GntR family transcriptional regulator	1	16.3	15.34	16.65	14.35	18.5	18.86	16.0967	17.2367	1.07082	0.517484
NP_214558.1	Rv0044c	oxidoreductase	5	13.34	13.73	15.19	18.21	20.02	19.5	14.0867	19.2433	1.36607	0.00271749
NP_214560.1	Rv0046c	myo-inositol-1-phosphate synthase INO1 (inositol 1-phosphate synthetase) (D-glucose 6-phosphate cycloaldolase) (glucose 6-phosphate cyclase) (glucocycloaldolase)	15	20.3	21.26	21.49	12.48	12.12	12.36	21.0167	12.32	0.586201	0.000841101
NP_214561.1	Rv0047c	hypothetical protein Rv0047c	2	14.44	15.37	12.78	18.85	19.97	18.59	14.1967	19.1367	1.34797	0.00949746
NP_214562.1	Rv0048c	hypothetical protein Rv0048c	5	16.04	16.19	15.28	18.21	17.83	16.45	15.8367	17.4967	1.10482	0.070139
YP_177687.1	Rv0050	bifunctional penicillin-binding protein 1A/1B	14	14.12	14.71	14.12	18.76	19.41	18.87	14.3167	19.0133	1.32806	7.54288e-05
NP_214565.1	Rv0051	transmembrane protein	1	14.23	14.19	15.16	18.66	19.17	18.59	14.5267	18.8067	1.29463	0.000986632
NP_214567.1	Rv0053	30S ribosomal protein S6	6	21.09	20.33	20.76	12.42	13	12.4	20.7267	12.6067	0.608234	1.15879e-05
NP_214568.1	Rv0054	single-stranded DNA-binding protein	8	19.12	20.23	19.68	13.18	13.05	14.75	19.6767	13.66	0.694223	0.00181234
YP_177688.1	Rv0055	30S ribosomal protein S18	12	12.36	18.07	13.52	16.86	17.64	21.56	14.65	18.6867	1.27554	0.152218
NP_214570.1	Rv0056	50S ribosomal protein L9	40	18.77	19.88	19.46	13.48	14.62	13.78	19.37	13.96	0.720702	0.000330906
NP_214572.1	Rv0058	replicative DNA helicase	5	9.14	9.36	8.92	23.24	24.54	24.79	9.14	24.19	2.64661	0.000511268
NP_214574.1	Rv0060	hypothetical protein Rv0060	13	12.52	12.77	13.93	18	22.09	20.69	13.0733	20.26	1.54972	0.017492
NP_214577.1	Rv0063	oxidoreductase	3	26.77	25.54	28.17	6.37	6.7	6.45	26.8267	6.50667	0.242545	0.00118628
NP_214580.1	Rv0066c	isocitrate dehydrogenase	26	13.82	14.77	15.72	18.52	17.3	19.87	14.77	18.5633	1.25683	0.0174178
NP_214581.1	Rv0067c	TetR family transcriptional regulator	2	16.38	15.08	15.5	17.03	17.96	18.06	15.6533	17.6833	1.12968	0.016539
NP_214584.1	Rv0070c	serine hydroxymethyltransferase	2	20.73	18.96	22.24	12.74	13.42	11.91	20.6433	12.69	0.614726	0.00585596
NP_214586.1	Rv0072	glutamine-transport transmembrane protein ABC transporter	4	14.63	15.11	15.1	17.48	18.16	19.51	14.9467	18.3833	1.22993	0.0227655
NP_214587.1	Rv0073	glutamine-transport ATP-binding protein ABC transporter	4	15.77	20.51	17.31	16.26	14.66	15.49	17.8633	15.47	0.86602	0.2227
NP_214588.1	Rv0074	hypothetical protein Rv0074	2	17.65	18.67	18.76	13.98	16	14.94	18.36	14.9733	0.815541	0.0124694
NP_214589.1	Rv0075	aminotransferase	1	18.25	18.44	20.98	11.5	15.06	15.78	19.2233	14.1133	0.734177	0.0395247
YP_177616.1	Rv0078A	hypothetical protein Rv0078A	3	14.35	14.59	16.13	18.4	17.94	18.59	15.0233	18.31	1.21877	0.0187296
NP_214602.1	Rv0088	hypothetical protein Rv0088	14	14.75	14.61	15.43	17.73	19.7	17.78	14.93	18.4033	1.23264	0.0216581
NP_214604.1	Rv0090	hypothetical protein Rv0090	1	15.29	15.18	19.47	16.33	17.57	16.15	16.6467	16.6833	1.0022	0.982159
NP_214605.1	Rv0091	bifunctional 5'-methylthioadenosine nucleosidase/S-adenosylhomocysteine nucleosidase	1	16.59	17.24	20.55	14.8	14.62	16.21	18.1267	15.21	0.839095	0.12667
NP_214606.1	Rv0092	cation transporter P-type ATPase A	1	15.19	14.27	15.6	17.91	19.62	17.42	15.02	18.3167	1.21949	0.0203103
NP_214611.1	Rv0097	oxidoreductase	1	13.83	13.4	13.01	18.76	21.32	19.68	13.4133	19.92	1.48509	0.00809707
NP_214617.1	Rv0103c	cation-transporter P-type ATPase B	5	7.68	9.42	9.88	21.16	24.06	27.81	8.99333	24.3433	2.70682	0.00911726
NP_214622.1	Rv0108c	hypothetical protein Rv0108c	1	20.63	28.23	19.29	9.07	10.91	11.87	22.7167	10.6167	0.467351	0.0399651
NP_214633.1	Rv0119	acyl-CoA synthetase	2	17.16	17.25	21.99	12.1	16.23	15.25	18.8	14.5267	0.772695	0.106402
NP_214634.1	Rv0120c	elongation factor G	5	14.35	12.77	15.98	19.52	18.67	18.71	14.3667	18.9667	1.32019	0.0298677
NP_214637.1	Rv0123	hypothetical protein Rv0123	2	16.92	17.3	15.22	15.66	17.76	17.14	16.48	16.8533	1.02265	0.697298
NP_214639.1	Rv0125	serine protease PepA	4	15.93	19.17	17.87	16.12	14.73	16.18	17.6567	15.6767	0.887861	0.158372
NP_214640.1	Rv0126	trehalose synthase TRES	2	16.79	16.19	19.2	15.59	16.28	15.94	17.3933	15.9367	0.916251	0.251296
YP_177694.1	Rv0129c	secreted antigen 85-C FBPC (85C) (antigen 85 complex C) (AG58C) (Mycolyl transferase 85C) (fibronectin-binding protein C)	4	21.7	23.93	23.78	9.98	11.5	9.12	23.1367	10.2	0.440859	0.000208168
NP_214644.1	Rv0130	hypothetical protein Rv0130	2	19.77	18.5	19.08	13.69	14.95	14.01	19.1167	14.2167	0.743679	0.000747531
NP_214645.1	Rv0131c	acyl-CoA dehydrogenase FADE1	6	12.86	12.08	14.82	18.79	20.76	20.68	13.2533	20.0767	1.51484	0.00333003
NP_214648.1	Rv0134	epoxide hydrolase EphF	2	17.27	17.56	17.71	15.31	15.88	16.27	17.5133	15.82	0.903312	0.0138007
NP_214651.1	Rv0137c	methionine sulfoxide reductase A	1	15.98	16.62	16.84	16.24	17.73	16.58	16.48	16.85	1.02245	0.524919
NP_214661.1	Rv0147	aldehyde dehydrogenase	20	15.36	13.43	14.44	18.48	19.47	18.82	14.41	18.9233	1.31321	0.00549253
NP_214662.1	Rv0148	short-chain type dehydrogenase/reductase	17	16.51	14.38	17.85	15.75	19.13	16.38	16.2467	17.0867	1.0517	0.593048
NP_214663.1	Rv0149	quinone oxidoreductase	3	14.73	15.2	16.16	16.52	18.24	19.16	15.3633	17.9733	1.16989	0.0572678
NP_214668.1	Rv0154c	acyl-CoA dehydrogenase FADE2	5	14.48	16.08	15.58	17.53	18.41	17.92	15.38	17.9533	1.16732	0.0163705
NP_214669.1	Rv0155	NAD(P) transhydrogenase subunit alpha	6	18.42	11.37	13.41	20.61	17.85	18.35	14.4	18.9367	1.31505	0.150705
NP_214670.1	Rv0156	NAD(P) transhydrogenase subunit alpha	6	18.29	10.33	11.38	23.67	17.95	18.38	13.3333	20	1.5	0.10403
NP_214671.1	Rv0157	NAD(P) transhydrogenase subunit beta	17	15.35	13.71	14.48	18.75	19.48	18.23	14.5133	18.82	1.29674	0.00250497
NP_214672.1	Rv0158	TetR family transcriptional regulator	2	15.54	16.68	16.88	15.66	18.53	16.7	16.3667	16.9633	1.03646	0.570472
YP_177699.1	Rv0162c	zinc-type alcohol dehydrogenase E subunit	2	17.48	19.77	18.29	15.16	13.81	15.48	18.5133	14.8167	0.800324	0.0137438
YP_177617.1	Rv0164	hypothetical protein Rv0164	8	19.32	16.03	19.7	14.53	17.03	13.39	18.35	14.9833	0.81653	0.101368
YP_177701.1	Rv0169	MCE-family protein MCE1A	6	12.7	14.95	15.35	20.86	15.24	20.9	14.3333	19	1.32558	0.115899
NP_214684.1	Rv0170	MCE-family protein MCE1B	5	18.77	17.48	19.97	14.32	15.1	14.36	18.74	14.5933	0.778726	0.0194513
NP_214685.1	Rv0171	MCE-family protein MCE1C	2	19.7	18.69	22.12	11.18	15.79	12.52	20.17	13.1633	0.652619	0.0173578
NP_214686.1	Rv0172	MCE-family protein MCE1D	4	20.94	18.8	21.89	12.33	14.07	11.98	20.5433	12.7933	0.622749	0.00333601
NP_214687.1	Rv0173	MCE-family lipoprotein LprK	3	20.01	18.21	22.5	11.89	14.88	12.52	20.24	13.0967	0.647069	0.012015
NP_214688.1	Rv0174	MCE-family protein MCE1F	7	21.3	20.15	21.52	12.11	12.64	12.28	20.99	12.3433	0.588058	0.000837144
NP_214689.1	Rv0175	mce associated membrane protein	4	15.25	15.59	18.15	16.08	17.61	17.31	16.33	17	1.04103	0.561347
NP_214691.1	Rv0177	MCE associated protein	4	18.38	18.24	19.37	14.24	15.5	14.27	18.6633	14.67	0.786033	0.00204187
NP_214692.1	Rv0178	mce associated membrane protein	4	15.64	16.17	17.76	15.88	17.73	16.82	16.5233	16.81	1.01735	0.748069
NP_214693.1	Rv0179c	lipoprotein LprO	2	19.55	19.84	22.12	12.56	12.72	13.22	20.5033	12.8333	0.625914	0.00808561
NP_214696.1	Rv0182c	RNA polymerase factor sigma-70	1	14	14	14.17	19.41	19.87	18.55	14.0567	19.2767	1.37135	0.00471248
NP_214697.2	Rv0183	lysophospholipase	2	17.29	20.8	21.23	13.86	12.6	14.23	19.7733	13.5633	0.685941	0.0256216
NP_214698.1	Rv0184	hypothetical protein Rv0184	2	13.89	12.84	13.54	18	21.28	20.45	13.4233	19.91	1.48324	0.0154584
NP_214701.1	Rv0187	O-methyltransferase	3	16.58	14.83	17.37	17.4	18.2	15.63	16.26	17.0767	1.05023	0.486943
NP_214703.1	Rv0189c	dihydroxy-acid dehydratase	13	15.24	18.84	15.78	16.54	16.34	17.26	16.62	16.7133	1.00562	0.942234
NP_214704.1	Rv0190	hypothetical protein Rv0190	4	16.34	17.43	13.39	19.09	16.01	17.74	15.72	17.6133	1.12044	0.280971
NP_214706.1	Rv0192	hypothetical protein Rv0192	2	3.96	3.33	3	26.02	30.21	33.48	3.43	29.9033	8.71817	0.00590626
NP_214711.1	Rv0197	oxidoreductase	2	8.66	6.51	8.81	22.88	25.8	27.33	7.99333	25.3367	3.16972	0.00106896
NP_214712.1	Rv0198c	zinc metalloprotease	9	14.01	13.89	13.72	19.74	18.95	19.69	13.8733	19.46	1.40269	0.000853374
NP_214713.1	Rv0199	hypothetical protein Rv0199	6	20.02	15.01	18.91	15.72	15.71	14.63	17.98	15.3533	0.853912	0.221814
NP_214716.1	Rv0202c	transmembrane transport protein MmpL11	1	16.08	15.03	14.82	18.06	18.18	17.82	15.31	18.02	1.17701	0.0149264
NP_214717.1	Rv0203	hypothetical protein Rv0203	1	14.09	14.49	15.1	17.05	20.2	19.07	14.56	18.7733	1.28938	0.0347533
NP_214720.1	Rv0206c	transmembrane transport protein MmpL3	20	15.49	14.96	17.18	16.8	18.52	17.05	15.8767	17.4567	1.09952	0.142698
NP_214722.1	Rv0208c	tRNA (guanine-N(7)-)-methyltransferase	1	19.75	19.94	21.77	12.37	13.79	12.38	20.4867	12.8467	0.627075	0.00100624
NP_214725.1	Rv0211	phosphoenolpyruvate carboxykinase	58	18.2	18.68	17.77	15.14	15.01	15.19	18.2167	15.1133	0.829643	0.00549378
NP_214726.1	Rv0212c	transcriptional regulatory protein NadR	2	17.96	18.2	19.34	14.43	15.35	14.71	18.5	14.83	0.801622	0.0034829
NP_214728.1	Rv0214	acyl-CoA synthetase	6	15.58	16.53	17.99	17.5	15.05	17.35	16.7	16.6333	0.996008	0.952833
NP_214734.1	Rv0220	esterase LipC	2	5.65	4.93	4.7	27.77	28.28	28.67	5.09333	28.24	5.5445	5.19339e-07
NP_214735.1	Rv0221	hypothetical protein Rv0221	2	14.28	14.59	18.59	15.8	18.43	18.31	15.82	17.5133	1.10704	0.368639
NP_214736.1	Rv0222	enoyl-CoA hydratase	16	17.45	17.56	17.28	16.72	15.49	15.51	17.43	15.9067	0.912603	0.0593641
NP_214737.1	Rv0223c	aldehyde dehydrogenase	9	17.82	14.41	20.07	14.28	16.58	16.83	17.4333	15.8967	0.911855	0.465279
NP_214741.1	Rv0227c	hypothetical protein Rv0227c	10	17.31	16.02	17.88	16.04	16.86	15.89	17.07	16.2633	0.952744	0.286096
NP_214744.1	Rv0230c	phosphotriesterase	7	19.05	17.72	19.27	14.91	15.11	13.95	18.68	14.6567	0.784618	0.0034814
NP_214745.1	Rv0231	acyl-CoA dehydrogenase FADE4	8	19	20.99	20.51	12.81	13.6	13.09	20.1667	13.1667	0.652893	0.00315634
NP_214747.1	Rv0233	ribonucleotide-diphosphate reductase subunit beta	1	9.31	10.24	8.93	25.38	21.19	24.95	9.49333	23.84	2.51124	0.00526402
NP_216247.2	Rv0234c	succinic semialdehyde dehydrogenase	9	13.92	13.58	13.15	23.32	16.5	19.53	13.55	19.7833	1.46002	0.0854404
YP_177702.1	Rv0237	lipoprotein LpqI	2	18.11	17.48	18.72	14.23	16.22	15.24	18.1033	15.23	0.841282	0.0191575
NP_214752.1	Rv0238	TetR family transcriptional regulator	3	12.29	16.93	14.31	17.84	18.04	20.59	14.51	18.8233	1.29727	0.0643033
NP_214755.1	Rv0241c	hypothetical protein Rv0241c	5	19.42	17.24	17	15.48	15.36	15.51	17.8867	15.45	0.863772	0.0864633
NP_214756.1	Rv0242c	3-ketoacyl-(acyl-carrier-protein) reductase	17	19.29	17.46	18.1	14.62	15.76	14.78	18.2833	15.0533	0.823336	0.010601
NP_214757.1	Rv0243	acetyl-CoA acetyltransferase	7	17.74	18.18	18.68	14.59	15.67	15.14	18.2	15.1333	0.831502	0.00189696
NP_214758.1	Rv0244c	acyl-CoA dehydrogenase FADE5	77	20.35	21.92	20.16	12.45	12.35	12.77	20.81	12.5233	0.601794	0.00313616
NP_214759.1	Rv0245	oxidoreductase	1	12.85	15.98	15.05	19.13	18.55	18.44	14.6267	18.7067	1.27894	0.0420348
NP_214761.1	Rv0247c	fumarate reductase iron-sulfur subunit	20	19.88	16.7	19.47	14.22	15.92	13.81	18.6833	14.65	0.784121	0.0349552
NP_214762.1	Rv0248c	succinate dehydrogenase flavoprotein subunit	27	18.59	19.32	20.03	13.47	15.24	13.35	19.3133	14.02	0.725923	0.00320947
NP_214763.1	Rv0249c	succinate dehydrogenase membrane anchor subunit	2	20.78	19.68	20.77	7.89	15.48	15.4	20.41	12.9233	0.633186	0.0939259
NP_214764.1	Rv0250c	hypothetical protein Rv0250c	2	12.41	12	11.89	18.44	21.69	23.57	12.1	21.2333	1.75482	0.0248068
NP_214765.1	Rv0251c	heat shock protein hsp (heat-stress-induced ribosome-binding protein A) Hsp20	22	0.61	0.43	0.26	31.45	35.32	31.93	0.433333	32.9	75.9231	0.00131532
YP_177705.1	Rv0265c	periplasmic IRON-transport lipoprotein	3	18.85	17.19	17.75	15.18	15.7	15.33	17.93	15.4033	0.859082	0.0264254
NP_214780.1	Rv0266c	5-oxoprolinase	1	14.56	13.32	14.95	18.88	17.04	21.25	14.2767	19.0567	1.33481	0.0442655
NP_214784.1	Rv0270	acyl-CoA synthetase	36	14.82	14.19	14.78	18.08	19.46	18.68	14.5967	18.74	1.28385	0.00277835
NP_214785.1	Rv0271c	acyl-CoA dehydrogenase FADE6	11	16.37	17.62	18.42	15.42	16.66	15.5	17.47	15.86	0.907842	0.0981775
NP_214788.1	Rv0274	hypothetical protein Rv0274	7	9.89	10.53	10.36	22.64	22.3	24.27	10.26	23.07	2.24854	0.00100288
YP_177706.1	Rv0275c	TetR family transcriptional regulator	2	6.29	7.12	6.61	28.25	24.8	26.93	6.67333	26.66	3.995	0.00157594
NP_214795.1	Rv0281	hypothetical protein Rv0281	3	15.67	16.5	14.33	18.28	17.44	17.78	15.5	17.8333	1.15054	0.0516443
NP_214796.1	Rv0282	hypothetical protein Rv0282	13	17.87	17.79	21.29	13.29	15.44	14.31	18.9833	14.3467	0.755751	0.03701
NP_214798.1	Rv0284	hypothetical protein Rv0284	6	18.3	18.8	19.5	14.54	14.33	14.52	18.8667	14.4633	0.766608	0.00487841
NP_214805.1	Rv0291	membrane-anchored mycosin	2	16.03	20.15	21.92	14.02	14.06	13.83	19.3667	13.97	0.721343	0.0903147
YP_177712.1	Rv0296c	sulfatase	1	14.32	18.9	14.89	19.03	15.8	17.06	16.0367	17.2967	1.07857	0.510691
NP_214812.1	Rv0298	hypothetical protein Rv0298	2	8.22	9.24	8.15	24.55	24.42	25.42	8.53667	24.7967	2.90472	4.80766e-06
NP_214815.1	Rv0301	hypothetical protein Rv0301	4	14.72	15.31	15.78	16.96	19.19	18.05	15.27	18.0667	1.18315	0.032086
NP_214817.1	Rv0303	dehydrogenase/reductase	2	13.99	13.05	15.63	17.35	20.11	19.87	14.2233	19.11	1.34357	0.0143002
NP_214821.1	Rv0307c	hypothetical protein Rv0307c	2	8.39	7.98	9.09	21.22	24.99	28.33	8.48667	24.8467	2.92773	0.0136915
NP_214823.1	Rv0309	hypothetical protein Rv0309	1	17.73	26.22	22.13	12.76	8.23	12.93	22.0267	11.3067	0.513317	0.0281038
NP_214824.1	Rv0310c	hypothetical protein Rv0310c	2	18.03	17.21	18.02	15.49	15.95	15.3	17.7533	15.58	0.877582	0.00405417
NP_214825.1	Rv0311	hypothetical protein Rv0311	3	12.89	12.37	12.39	20.38	20.14	21.83	12.55	20.7833	1.65604	0.00198925
NP_214828.1	Rv0314c	hypothetical protein Rv0314c	1	17.74	18	18.58	13.44	15.14	17.09	18.1067	15.2233	0.840758	0.104797
NP_214838.1	Rv0324	ArsR family transcriptional regulator	2	16.14	18.14	15.9	17.11	15.53	17.18	16.7267	16.6067	0.992826	0.899849
NP_214841.1	Rv0327c	cytochrome P450 135A1	1	10.09	9.39	9.44	21.69	23.8	25.58	9.64	23.69	2.45747	0.00490899
NP_214845.1	Rv0331	dehydrogenase/reductase	6	16.36	15.84	16.59	16.43	18.1	16.67	16.2633	17.0667	1.0494	0.260603
NP_214848.1	Rv0334	alpha-D-glucose-1-phosphate thymidylyltransferase RmlA	4	16.38	18.79	15.05	18.01	14.87	16.9	16.74	16.5933	0.991239	0.923353
NP_214850.1	Rv0336	13E12 repeat family protein	2	7.04	7.34	6.99	24.36	25.31	28.96	7.12333	26.21	3.67946	0.00513471
NP_214851.1	Rv0337c	aminotransferase AlaT	10	11.43	12.25	12.07	20.35	21.03	22.86	11.9167	21.4133	1.79692	0.00315092
NP_214852.1	Rv0338c	iron-sulfur-binding reductase	24	13.52	13.9	12.71	19.98	19.38	20.52	13.3767	19.96	1.49215	0.000169519
NP_214856.1	Rv0342	isoniazid inductible gene protein INIA	1	17.75	15.27	18.03	16.86	17.05	15.03	17.0167	16.3133	0.958668	0.556209
NP_214862.1	Rv0348	transcriptional regulatory protein	2	12.35	11.34	11.58	18.51	23.01	23.22	11.7567	21.58	1.83555	0.0202815
NP_214864.1	Rv0350	molecular chaperone DnaK	235	10.63	11.04	9.53	24.52	21.62	22.67	10.4	22.9367	2.20545	0.000896136
NP_214865.1	Rv0351	GRPE protein (HSP-70 cofactor)	31	11.56	12.74	12.52	18.26	22.18	22.74	12.2733	21.06	1.71592	0.0194644
YP_177719.1	Rv0352	chaperone protein DnaJ1	19	11.1	12.54	9.38	22.66	20.75	23.57	11.0067	22.3267	2.02847	0.000819423
NP_214871.1	Rv0357c	adenylosuccinate synthetase	8	18.55	18.99	17.77	15.06	14.35	15.29	18.4367	14.9	0.808172	0.0018162
NP_214876.1	Rv0362	Mg2+ transport transmembrane protein MgtE	1	14.19	16.71	15.17	18.19	17.2	18.54	15.3567	17.9767	1.17061	0.0496773
NP_214877.1	Rv0363c	fructose-bisphosphate aldolase	58	16.72	18.53	15.18	17.97	15.26	16.34	16.81	16.5233	0.982947	0.830042
NP_214878.1	Rv0364	transmembrane protein	2	16.03	17.17	16.14	16.95	16.93	16.77	16.4467	16.8833	1.02655	0.351826
NP_214879.1	Rv0365c	hypothetical protein Rv0365c	2	18.85	15.47	16.82	15.84	17.79	15.22	17.0467	16.2833	0.955221	0.576332
NP_214883.1	Rv0369c	membrane oxidoreductase	1	4.74	3.77	4.42	28.57	30.58	27.92	4.31	29.0233	6.73395	0.00031463
YP_177722.1	Rv0379	protein transport protein	2	22.86	17.06	16.33	11.73	17.31	14.71	18.75	14.5833	0.777778	0.19117
NP_214895.1	Rv0381c	hypothetical protein Rv0381c	1	18.32	17.11	18.61	15.43	15.29	15.25	18.0133	15.3233	0.850666	0.0265499
NP_214897.1	Rv0383c	hypothetical protein Rv0383c	1	15.8	17.32	15.81	18.42	15.99	16.66	16.31	17.0233	1.04374	0.46963
NP_214898.1	Rv0384c	endopeptidase ATP binding protein	112	7.1	6.74	6.58	25.32	27.47	26.78	6.80667	26.5233	3.89667	0.000576829
NP_214900.1	Rv0386	LuxR/UHPA family transcriptional regulator	1	8.77	11.25	8.4	30.03	19.63	21.92	9.47333	23.86	2.51865	0.0366153
NP_214903.1	Rv0389	phosphoribosylglycinamide formyltransferase 2	2	15.8	15.66	15.12	17.01	19.37	17.05	15.5267	17.81	1.14706	0.0909435
NP_214905.1	Rv0391	O-succinylhomoserine sulfhydrylase	8	17.21	19.03	17.13	17.29	13.86	15.48	17.79	15.5433	0.873712	0.140424
NP_214906.1	Rv0392c	membrane NADH dehydrogenase	6	17.98	17.93	19.37	15.54	14.05	15.14	18.4267	14.91	0.809153	0.00566979
NP_214908.1	Rv0394c	hypothetical protein Rv0394c	5	18.18	19.34	17.59	14.54	14.12	16.22	18.37	14.96	0.814371	0.0157184
NP_214914.1	Rv0400c	acyl-CoA dehydrogenase FADE7	10	17.89	16	16.87	16.05	16.71	16.48	16.92	16.4133	0.970055	0.457877
NP_214918.1	Rv0404	acyl-CoA synthetase	5	20.32	19.73	22.59	12.06	12.06	13.23	20.88	12.45	0.596264	0.00415716
NP_214919.1	Rv0405	membrane bound polyketide synthase	3	14.97	18.47	25.14	13.59	13.41	14.41	19.5267	13.8033	0.706897	0.193886
NP_214920.1	Rv0406c	beta lactamase like protein	2	13.72	14.77	14.61	18.18	18.54	20.18	14.3667	18.9667	1.32019	0.00676449
NP_214921.1	Rv0407	F420-dependent glucose-6-phosphate dehydrogenase	12	15.28	14.91	15.89	18.04	18.03	17.85	15.36	17.9733	1.17014	0.00923615
NP_214922.1	Rv0408	phosphate acetyltransferase	1	11.24	11.13	14.46	19.44	19.69	24.04	12.2767	21.0567	1.71518	0.0111422
NP_214923.1	Rv0409	acetate kinase	1	11.39	15.41	16.16	16.17	20.19	20.68	14.32	19.0133	1.32775	0.0847943
NP_214925.1	Rv0411c	glutamine-binding lipoprotein	4	12.34	11.78	16.61	20.07	17.45	21.74	13.5767	19.7533	1.45495	0.0369509
NP_214926.1	Rv0412c	hypothetical protein Rv0412c	5	12.5	13.26	13.28	20.33	20.04	20.59	13.0133	20.32	1.56148	7.26891e-05
NP_214931.1	Rv0417	thiazole synthase	1	18.4	17.56	20.08	12.82	16.11	15.04	18.68	14.6567	0.784618	0.0330747
NP_214932.1	Rv0418	lipoprotein aminopeptidase LpqL	12	16.77	16.41	17.32	16.53	17.73	15.25	16.8333	16.5033	0.980396	0.699585
NP_214933.1	Rv0419	lipoprotein peptidase LpqM	1	14.99	14.82	16.41	18.68	17.5	17.6	15.4067	17.9267	1.16357	0.0187029
NP_214936.1	Rv0422c	phosphomethylpyrimidine kinase	1	19.24	18.21	19.34	13.99	15.51	13.71	18.93	14.4033	0.760873	0.00422489
NP_214937.1	Rv0423c	thiamine biosynthesis protein ThiC	15	11.98	14	10.03	23.81	18.81	21.38	12.0033	21.3333	1.77728	0.00818391
NP_214938.1	Rv0424c	hypothetical protein Rv0424c	8	12.9	11.66	12.13	20.1	21.93	21.29	12.23	21.1067	1.72581	0.000357835
NP_214939.1	Rv0425c	metal cation transporting P-type ATPase CtpH	1	6.49	6.07	5.73	26.93	24.74	30.04	6.09667	27.2367	4.46747	0.00456541
NP_214940.1	Rv0426c	hypothetical protein Rv0426c	7	10.3	9.64	9.19	24.78	23.86	22.23	9.71	23.6233	2.43289	0.000748863
NP_214943.1	Rv0429c	peptide deformylase	1	18.43	21.66	18.47	12.01	15.3	14.13	19.52	13.8133	0.70765	0.0169758
NP_214944.1	Rv0430	hypothetical protein Rv0430	1	8.54	10.25	8.94	20.55	22.84	28.89	9.24333	24.0933	2.60656	0.0230808
NP_214946.1	Rv0432	periplasmic superoxide dismutase [Cu-Zn] SodC	4	13.25	13.18	16.93	16.81	21.19	18.65	14.4533	18.8833	1.3065	0.0669814
NP_214947.1	Rv0433	carboxylate-amine ligase	2	16.63	16.48	19.66	15.01	16.85	15.38	17.59	15.7467	0.895206	0.21332
NP_214949.1	Rv0435c	putative ATPase	5	16.49	16.82	19.04	14.64	16.46	16.56	17.45	15.8867	0.910411	0.202556
NP_214953.1	Rv0439c	short chain dehydrogenase	2	18.05	17.44	17.78	15.15	16.41	15.16	17.7567	15.5733	0.877041	0.021885
NP_214954.1	Rv0440	chaperonin GroEL	569	17.84	17.37	17.22	16.21	15.84	15.53	17.4767	15.86	0.907496	0.00400526
NP_214957.1	Rv0443	hypothetical protein Rv0443	1	13.02	19.42	14.72	17.61	15.82	19.41	15.72	17.6133	1.12044	0.44686
NP_214959.1	Rv0445c	RNA polymerase sigma factor SigK	1	15.84	16.93	17.36	16.42	17.25	16.2	16.71	16.6233	0.994813	0.884051
NP_214964.1	Rv0450c	transmembrane transport protein MmpL4	8	14.67	12.97	14.6	19.38	19.85	18.53	14.08	19.2533	1.36742	0.00246093
NP_214965.1	Rv0451c	membrane protein	1	16.87	14.76	16.12	16.01	18.89	17.35	15.9167	17.4167	1.09424	0.22699
NP_214970.1	Rv0456c	enoyl-CoA hydratase	1	20.76	22.44	22.95	10.45	11.01	12.4	22.05	11.2867	0.511867	0.000282605
NP_214971.1	Rv0457c	peptidase	2	13.28	16.18	16.57	17.9	16.73	19.35	15.3433	17.9933	1.17271	0.114632
NP_214972.1	Rv0458	aldehyde dehydrogenase	9	15.09	14.97	18.43	16.26	17.29	17.96	16.1633	17.17	1.06228	0.48058
NP_214975.1	Rv0461	hypothetical protein Rv0461	1	19.56	18.35	20.59	13.92	14.94	12.63	19.5	13.83	0.709231	0.00367979
NP_214976.1	Rv0462	dihydrolipoamide dehydrogenase	45	15.63	17.5	16.76	16.66	16.18	17.26	16.63	16.7	1.00421	0.917774
NP_214978.1	Rv0464c	hypothetical protein Rv0464c	2	14.71	14.15	15.68	17.1	19.39	18.97	14.8467	18.4867	1.24517	0.0172314
YP_177728.1	Rv0467	isocitrate lyase	35	23.49	22.11	22.69	10.55	11.13	10.03	22.7633	10.57	0.464343	2.75852e-05
NP_214982.1	Rv0468	3-hydroxybutyryl-CoA dehydrogenase	11	17.17	19.19	19.16	13.84	15.63	14.99	18.5067	14.82	0.800793	0.0138176
YP_177729.1	Rv0469	mycolic acid synthase	53	18.01	18.43	20.69	12.99	15.06	14.82	19.0433	14.29	0.750394	0.0123356
YP_177730.1	Rv0470c	mycolic acid synthase pcaA (cyclopropane synthase)	34	16.72	15.78	19.05	15.54	16.76	16.15	17.1833	16.15	0.939864	0.403753
NP_214986.1	Rv0472c	TetR family transcriptional regulator	4	14.92	17.03	17.84	16.35	16.76	17.11	16.5967	16.74	1.00864	0.886316
NP_214988.1	Rv0474	transcriptional regulatory protein	2	21.08	11.53	13.61	18.56	17.15	18.07	15.4067	17.9267	1.16357	0.477167
NP_214989.1	Rv0475	iron-regulated heparin binding hemagglutinin hbhA (adhesin)	13	18.34	22.65	21	12.59	13.11	12.31	20.6633	12.67	0.613163	0.0208086
NP_214993.1	Rv0479c	hypothetical protein Rv0479c	9	14.32	13.84	16.46	17.22	20.81	17.35	14.8733	18.46	1.24115	0.0736743
NP_214994.2	Rv0480c	amidohydrolase	1	16.2	15.44	15.69	17.03	17.11	18.55	15.7767	17.5633	1.11325	0.0510319
NP_214996.1	Rv0482	UDP-N-acetylenolpyruvoylglucosamine reductase	1	18.13	20.59	19.15	14.43	12.93	14.76	19.29	14.04	0.727838	0.00523889
NP_214997.1	Rv0483	lipoprotein LprQ	3	13.91	13.21	15.47	19.24	18.78	19.39	14.1967	19.1367	1.34797	0.0129336
NP_215000.1	Rv0486	mannosyltransferase	1	9.59	9.56	9.68	25.07	22.09	24.01	9.61	23.7233	2.46861	0.00374804
YP_177731.1	Rv0489	phosphoglyceromutase	1	19.02	20.21	16.62	16.29	13.82	14.04	18.6167	14.7167	0.79051	0.0458149
NP_215004.1	Rv0490	putative two component sensor histidine kinase SENX3	1	14.99	13.13	13.5	19.97	19.74	18.67	13.8733	19.46	1.40269	0.00202304
NP_215005.1	Rv0491	two component sensory transduction protein RegX3	5	12.38	13.66	13.47	18.96	20.62	20.91	13.17	20.1633	1.531	0.00129592
NP_215009.1	Rv0495c	hypothetical protein Rv0495c	7	14.08	13.56	15.05	17.84	19.67	19.8	14.23	19.1033	1.34247	0.00469377
NP_215010.1	Rv0496	hypothetical protein Rv0496	5	17.06	16.71	17.89	16.59	16.05	15.71	17.22	16.1167	0.935927	0.0693061
NP_215014.1	Rv0500	pyrroline-5-carboxylate reductase	4	10.87	12.23	14.38	19.99	20.29	22.24	12.4933	20.84	1.66809	0.00385677
NP_215016.1	Rv0502	hypothetical protein Rv0502	1	10.81	11.71	12.29	20.96	21.54	22.68	11.6033	21.7267	1.87245	0.000126917
NP_215017.1	Rv0503c	cyclopropane-fatty-acyl-phospholipid synthase 2 CMAA2 (cyclopropane fatty acid synthase) (CFA synthase) (cyclopropane mycolic acid synthase 2) (mycolic acid trans-cyclopropane synthetase)	26	18.06	20.41	21.61	12.54	13.85	13.52	20.0267	13.3033	0.664281	0.0141869
NP_215018.1	Rv0504c	hypothetical protein Rv0504c	9	18.48	20.04	19.94	13.28	13.22	15.03	19.4867	13.8433	0.7104	0.00212528
YP_177732.1	Rv0505c	phosphoserine phosphatase	5	12.05	11.66	14.92	18.57	22.19	20.62	12.8767	20.46	1.58892	0.00667771
NP_215021.1	Rv0507	transmembrane transport protein MmpL2	2	7.91	8.39	9.27	23.03	23.5	27.89	8.52333	24.8067	2.91044	0.00615476
NP_215023.1	Rv0509	glutamyl-tRNA reductase	1	16.87	15.11	18.86	16.38	16.57	16.21	16.9467	16.3867	0.966955	0.65723
YP_177733.1	Rv0511	uroporphyrin-III C-methyltransferase HemD	7	18.37	18.26	16.89	15.82	15.23	15.42	17.84	15.49	0.868274	0.0273587
NP_215026.1	Rv0512	delta-aminolevulinic acid dehydratase	2	18.24	19.03	15.86	16.68	14.5	15.68	17.71	15.62	0.881988	0.15214
NP_215027.1	Rv0513	transmembrane protein	3	16.28	15.8	17.85	15.9	17.72	16.45	16.6433	16.69	1.0028	0.957434
NP_215030.1	Rv0516c	hypothetical protein Rv0516c	3	6.29	6.92	6.82	24.88	28.52	26.57	6.67667	26.6567	3.99251	0.00209005
NP_215037.1	Rv0523c	hypothetical protein Rv0523c	3	17.81	12.46	12.39	18.98	19.91	18.44	14.22	19.11	1.34388	0.105328
NP_215052.1	Rv0538	hypothetical protein Rv0538	1	24.62	12.58	15.29	18.45	14.82	14.25	17.4967	15.84	0.905315	0.703045
NP_215054.1	Rv0540	hypothetical protein Rv0540	2	15.51	15.13	14.84	19.01	18.42	17.09	15.16	18.1733	1.19877	0.0240521
NP_215061.1	Rv0547c	short chain dehydrogenase	2	18.28	19.57	21.39	13.16	13.63	13.96	19.7467	13.5833	0.68788	0.0159524
NP_215062.1	Rv0548c	naphthoate synthase	2	15.72	15.74	16.45	16.59	17.96	17.54	15.97	17.3633	1.08725	0.0539644
NP_215065.1	Rv0551c	acyl-CoA synthetase	10	15.72	17.6	17.22	16.26	15.91	17.29	16.8467	16.4867	0.978631	0.640271
NP_215066.1	Rv0552	hypothetical protein Rv0552	1	11.97	11.83	14.5	18.81	21.09	21.8	12.7667	20.5667	1.61097	0.00339284
NP_215067.1	Rv0553	O-succinylbenzoate synthase	1	15.46	15.06	13.49	18.73	18.87	18.39	14.67	18.6633	1.27221	0.0175917
NP_215068.1	Rv0554	peroxidase BpoC	5	16.91	19.05	18.89	15.81	14	15.34	18.2833	15.05	0.823154	0.0230713
NP_215078.1	Rv0564c	NAD(P)H-dependent glycerol-3-phosphate dehydrogenase	2	13.58	16.96	13.89	22.75	13.47	19.35	14.81	18.5233	1.25073	0.30436
NP_215079.1	Rv0565c	monooxygenase	3	13.52	14.15	14.7	20.07	17.28	20.28	14.1233	19.21	1.36016	0.0240964
NP_215080.1	Rv0566c	putative nucleotide-binding protein	33	19.21	18.16	18.61	14.37	15.22	14.42	18.66	14.67	0.786174	0.000656663
NP_215081.1	Rv0567	methyltransferase/methylase	3	17.8	16.4	18.81	14.26	16.53	16.21	17.67	15.6667	0.886625	0.114559
NP_215082.1	Rv0568	cytochrome P450 135B1	1	13.63	16.38	16.91	18.35	18.39	16.34	15.64	17.6933	1.13129	0.178522
NP_215083.1	Rv0569	hypothetical protein Rv0569	2	9.62	10.32	8.15	25.01	22.38	24.51	9.36333	23.9667	2.55963	0.000196453
NP_215084.1	Rv0570	ribonucleoside-diphosphate reductase large subunit NrdZ	1	14.66	15.31	15.61	18.39	17.98	18.05	15.1933	18.14	1.19394	0.00327032
NP_215085.1	Rv0571c	hypothetical protein Rv0571c	3	14.54	14.73	15.55	18.31	18.77	18.09	14.94	18.39	1.23092	0.00148495
NP_215091.1	Rv0577	hypothetical protein Rv0577	1	22.44	21.5	20.17	11.43	11.83	12.64	21.37	11.9667	0.559975	0.000959819
NP_215094.1	Rv0580c	hypothetical protein Rv0580c	5	12.25	12.63	12.63	19.61	20.47	22.42	12.5033	20.8333	1.66622	0.00861787
NP_215097.1	Rv0583c	lipoprotein LpqN	6	19.82	16.8	19.54	14.08	15.94	13.82	18.72	14.6133	0.780627	0.029961
NP_215100.1	Rv0586	GntR family transcriptional regulator	2	15.65	13.57	14.55	18.46	19.55	18.21	14.59	18.74	1.28444	0.00674171
NP_215104.1	Rv0590	MCE-family protein MCE2B	7	17.98	13.82	18.24	17.07	17	15.89	16.68	16.6533	0.998401	0.987096
NP_215113.1	Rv0599c	hypothetical protein Rv0599c	2	12.55	11.83	11.29	21.57	21.4	21.37	11.89	21.4467	1.80376	0.001109
NP_215118.1	Rv0604	lipoprotein lpqo	2	17.12	16.65	20	12.61	17.27	16.34	17.9233	15.4067	0.859587	0.233579
NP_215119.1	Rv0605	resolvase	6	2.09	2.12	2.2	29.55	31.78	32.26	2.13667	31.1967	14.6006	0.000811044
NP_215120.1	Rv0606	hypothetical protein Rv0606	1	13.96	15.04	14.29	18.48	19.81	18.42	14.43	18.9033	1.31	0.00200087
NP_215122.1	Rv0608	hypothetical protein Rv0608	1	17.41	15.7	14.9	16.97	17.74	17.27	16.0033	17.3267	1.08269	0.209623
NP_215127.1	Rv0613c	hypothetical protein Rv0613c	4	13.88	14.61	16.26	18.81	18.23	18.21	14.9167	18.4167	1.23464	0.030603
NP_215144.1	Rv0630c	exonuclease V beta chain	1	16.64	16.87	19.64	15.46	16.79	14.6	17.7167	15.6167	0.881468	0.154213
NP_215145.1	Rv0631c	exonuclease V gamma chain	1	16.84	11.05	16.63	18.21	18.26	19	14.84	18.49	1.24596	0.192166
NP_215146.1	Rv0632c	enoyl-CoA hydratase	12	18.96	18.18	17.93	15.45	14.96	14.52	18.3567	14.9767	0.815871	0.00129135
NP_215147.1	Rv0633c	hypothetical protein Rv0633c	4	15.53	15.36	17.74	15.9	17.53	17.94	16.21	17.1233	1.05634	0.409537
YP_177629.1	Rv0634A	hypothetical protein Rv0634A	1	17.8	16.24	14.83	16.41	18.4	16.32	16.29	17.0433	1.04625	0.530752
YP_177630.1	Rv0634B	50S ribosomal protein L33	2	12.87	11.21	15.01	17.15	23.75	20	13.03	20.3	1.55794	0.0418406
NP_215149.1	Rv0635	(3R)-hydroxyacyl-ACP dehydratase subunit HadA	18	20.49	20.24	15.98	16.15	12.79	14.34	18.9033	14.4267	0.763181	0.0726714
NP_215150.1	Rv0636	(3R)-hydroxyacyl-ACP dehydratase subunit HadB	33	18.34	18.21	19.67	14.34	15.1	14.33	18.74	14.59	0.778549	0.00390298
NP_215151.1	Rv0637	(3R)-hydroxyacyl-ACP dehydratase subunit HadC	2	19.33	11.67	18.09	17.44	18.26	15.22	16.3633	16.9733	1.03728	0.828141
YP_177743.1	Rv0638	preprotein translocase subunit SecE	4	17.88	14.42	17.3	16.97	16.92	16.5	16.5333	16.7967	1.01593	0.829367
NP_215153.1	Rv0639	transcription antitermination protein NusG	9	14.4	15.71	14.54	17.63	17.83	19.89	14.8833	18.45	1.23964	0.0206447
NP_215154.1	Rv0640	50S ribosomal protein L11	24	18.14	16.38	17.43	14.76	17.22	16.07	17.3167	16.0167	0.924928	0.218662
NP_215155.1	Rv0641	50S ribosomal protein L1	47	18.33	18.69	18.57	14.7	14.76	14.95	18.53	14.8033	0.798885	2.14554e-05
NP_215156.1	Rv0642c	methoxy mycolic acid synthase	27	18.96	19.47	19.35	13.68	14.09	14.45	19.26	14.0733	0.730703	0.000101501
NP_215157.1	Rv0643c	methoxy mycolic acid synthase	19	20.34	22.91	22.11	11.48	11.39	11.77	21.7867	11.5467	0.529988	0.00467636
NP_215158.1	Rv0644c	methoxy mycolic acid synthase	7	19.43	19	20.22	13.07	14.97	13.31	19.55	13.7833	0.70503	0.00265722
NP_215159.1	Rv0645c	methoxy mycolic acid synthase	4	14.96	14.86	18.24	14.89	18.76	18.27	16.02	17.3067	1.08032	0.478695
NP_215160.1	Rv0646c	lipase/esterase LipG	10	17.39	18.12	18.04	15.4	15.9	15.14	17.85	15.48	0.867227	0.00180729
NP_215161.1	Rv0647c	hypothetical protein Rv0647c	13	15.28	18.16	17.74	16.35	15.59	16.89	17.06	16.2767	0.954084	0.486404
NP_215165.1	Rv0651	50S ribosomal protein L10	18	22.25	21.49	19.52	12.01	12.93	11.8	21.0867	12.2467	0.580778	0.00326962
NP_215166.1	Rv0652	50S ribosomal protein L7/L12	57	18.56	20.78	19.34	13.34	13.57	14.42	19.56	13.7767	0.704329	0.00438332
NP_215169.1	Rv0655	ribonucleotide ABC transporter ATP-binding protein	11	15.82	16.77	16.19	17.12	16.64	17.46	16.26	17.0733	1.05002	0.0911014
NP_215177.1	Rv0663	arylsulfatase AtsD	5	6.74	7.4	7.51	25	25.37	27.96	7.21667	26.11	3.61801	0.00140575
NP_215181.1	Rv0667	DNA-directed RNA polymerase subunit beta	99	17.42	17.42	19.33	15.71	15.35	14.76	18.0567	15.2733	0.845856	0.0331207
NP_215182.1	Rv0668	DNA-directed RNA polymerase subunit beta'	132	17.77	18.91	19.59	14.13	14.74	14.86	18.7567	14.5767	0.777146	0.00764243
NP_215183.1	Rv0669c	hydrolase	1	13.91	16.77	8.09	21.33	14.65	25.26	12.9233	20.4133	1.57957	0.138057
NP_215184.1	Rv0670	endonuclease IV	3	13.64	12.91	14.02	19.16	19.63	20.65	13.5233	19.8133	1.46512	0.000508582
NP_215185.1	Rv0671	lipoprotein LpqP	1	11.57	12.2	12.28	21.22	21.23	21.5	12.0167	21.3167	1.77393	0.000103317
NP_215186.1	Rv0672	acyl-CoA dehydrogenase FADE8	3	18.21	20.51	17.86	15.24	12.47	15.71	18.86	14.4733	0.767409	0.0301508
NP_215190.1	Rv0676c	transmembrane transport protein MmpL5	1	10.77	9.49	10.46	22.35	24.84	22.1	10.24	23.0967	2.25553	0.00137196
NP_215191.1	Rv0677c	hypothetical protein Rv0677c	3	13.47	7.83	10.65	24.2	21.98	21.87	10.65	22.6833	2.12989	0.00813214
NP_215193.1	Rv0679c	putative threonine rich protein	2	17.99	17.86	16.99	15.95	16.35	14.85	17.6133	15.7167	0.892316	0.0306738
NP_215196.1	Rv0682	30S ribosomal protein S12	24	9.72	15.38	9.95	22.47	19.89	22.59	11.6833	21.65	1.85307	0.0184751
NP_215197.1	Rv0683	30S ribosomal protein S7	22	18.66	18.87	17.05	15.25	14.78	15.39	18.1933	15.14	0.832173	0.0248471
YP_177746.1	Rv0684	elongation factor G	119	20.04	19.57	19.84	13.69	13.58	13.27	19.8167	13.5133	0.681918	4.74368e-06
NP_215199.1	Rv0685	elongation factor Tu	179	19.69	18.53	19.28	13.74	14.16	14.59	19.1667	14.1633	0.738957	0.000473873
NP_215200.1	Rv0686	hypothetical protein Rv0686	1	17.53	12.58	16.04	17.59	19.16	17.1	15.3833	17.95	1.16685	0.215455
NP_215202.1	Rv0688	putative ferredoxin reductase	3	15.61	17.23	16.21	17.46	15.68	17.81	16.35	16.9833	1.03874	0.482893
NP_215208.1	Rv0694	L-lactate dehydrogenase (cytochrome) LldD1	9	23.92	18.87	22.88	11.42	11.9	11.02	21.89	11.4467	0.522918	0.018816
NP_215214.1	Rv0700	30S ribosomal protein S10	17	20.51	19.49	21.8	11.77	13.89	12.54	20.6	12.7333	0.618123	0.00101606
NP_215215.1	Rv0701	50S ribosomal protein L3	35	19.08	19.82	20.02	13.7	13.77	13.6	19.64	13.69	0.697047	0.00179058
NP_215216.1	Rv0702	50S ribosomal protein L4	10	18.6	21.39	19.88	13.21	13.44	13.47	19.9567	13.3733	0.670119	0.0139499
NP_215217.1	Rv0703	50S ribosomal protein L23	11	17.17	20.63	18.55	15.19	13.95	14.51	18.7833	14.55	0.774623	0.0397707
NP_215218.1	Rv0704	50S ribosomal protein L2	23	12.15	17.88	12.77	20.03	16.99	20.18	14.2667	19.0667	1.33645	0.10043
NP_215219.1	Rv0705	30S ribosomal protein S19	11	17.65	23.64	16.53	16.06	10.7	15.41	19.2733	14.0567	0.729332	0.138597
NP_215220.1	Rv0706	50S ribosomal protein L22	9	16.58	18.94	16.44	16	15.4	16.65	17.32	16.0167	0.92475	0.245795
NP_215221.1	Rv0707	30S ribosomal protein S3	36	20.7	19.13	19.78	13	13.81	13.58	19.87	13.4633	0.677571	0.00105319
NP_215222.1	Rv0708	50S ribosomal protein L16	12	16.48	17.74	18.03	16.43	15.52	15.8	17.4167	15.9167	0.913876	0.0670668
NP_215224.1	Rv0710	30S ribosomal protein S17	25	17.37	19.99	16.15	15.19	15.72	15.59	17.8367	15.5	0.868996	0.172949
NP_215225.1	Rv0711	arylsulfatase AtsA	3	17.23	17.8	18.37	15.74	14.95	15.91	17.8	15.5333	0.872659	0.0070837
NP_215226.1	Rv0712	hypothetical protein Rv0712	1	16.3	17.77	16.15	17.15	15.92	16.71	16.74	16.5933	0.991239	0.828572
NP_215228.1	Rv0714	50S ribosomal protein L14	17	19.18	18.49	19.91	13.13	15.36	13.93	19.1933	14.14	0.736714	0.00499869
NP_215229.1	Rv0715	50S ribosomal protein L24	9	19.91	18.99	18.43	15.57	13.93	13.18	19.11	14.2267	0.744462	0.00730777
NP_215230.1	Rv0716	50S ribosomal protein L5	23	20.53	18.94	19.17	13.48	14.45	13.43	19.5467	13.7867	0.705321	0.00122264
YP_177747.1	Rv0717	30S ribosomal protein S14	1	15.33	17.19	13.4	18.82	16.94	18.31	15.3067	18.0233	1.17748	0.114652
NP_215232.1	Rv0718	30S ribosomal protein S8	11	19.06	18.21	19.99	14.21	14.91	13.62	19.0867	14.2467	0.74642	0.00228559
NP_215233.1	Rv0719	50S ribosomal protein L6	25	18.29	18.63	19.43	14.19	15.05	14.42	18.7833	14.5533	0.7748	0.000798978
NP_215234.1	Rv0720	50S ribosomal protein L18	21	20.03	20.16	18.97	13.35	13.6	13.89	19.72	13.6133	0.690331	0.00119716
NP_215235.1	Rv0721	30S ribosomal protein S5	18	19.81	20.76	20.02	13.12	13.72	12.57	20.1967	13.1367	0.650437	0.000100517
NP_215236.1	Rv0722	50S ribosomal protein L30	10	21.58	21.16	19.68	11.62	12.85	13.1	20.8067	12.5233	0.60189	0.000464519
NP_215237.1	Rv0723	50S ribosomal protein L15	18	16.44	20.39	18.26	14.99	14.85	15.05	18.3633	14.9633	0.814848	0.0962482
NP_215238.1	Rv0724	protease IV SppA	4	12.08	11.67	9.8	23.88	21.07	21.49	11.1833	22.1467	1.98033	0.000768625
NP_215240.1	Rv0726c	hypothetical protein Rv0726c	1	11.85	7.06	7.79	24.55	26.8	21.96	8.9	24.4367	2.74569	0.00163157
NP_215244.1	Rv0730	hypothetical protein Rv0730	9	18.16	17.48	18.49	14.63	16.7	14.54	18.0433	15.29	0.847404	0.0439734
NP_215246.1	Rv0732	preprotein translocase subunit SecY	3	12.98	15.02	15.16	18.41	17.81	20.62	14.3867	18.9467	1.31696	0.0157454
NP_215247.1	Rv0733	adenylate kinase	19	20.81	19.29	17.65	14.98	14.01	13.26	19.25	14.0833	0.731602	0.014533
YP_177748.1	Rv0734	methionine aminopeptidase	1	19.15	19.27	18.86	14.41	14.16	14.15	19.0933	14.24	0.74581	1.46467e-05
NP_215265.1	Rv0751c	3-hydroxyisobutyrate dehydrogenase MmsB	5	14.98	16.67	13.12	19.54	17.12	18.57	14.9233	18.41	1.23364	0.0558577
NP_215266.1	Rv0752c	acyl-CoA dehydrogenase FADE9	4	11.04	10.07	11	21.44	24.32	22.14	10.7033	22.6333	2.11461	0.0022615
NP_215267.1	Rv0753c	methylmalonate-semialdehyde dehydrogenase	15	9.48	11.61	10.49	22.05	22.2	24.17	10.5267	22.8067	2.16656	0.000193914
NP_215271.1	Rv0757	two component system response transcriptional positive regulator PHOP	3	16.82	13.33	11.87	17.86	20.64	19.49	14.0067	19.33	1.38006	0.0478425
NP_215274.1	Rv0760c	hypothetical protein Rv0760c	2	17.53	16.06	18.52	14.75	16.83	16.31	17.37	15.9633	0.919017	0.213772
YP_177754.1	Rv0761c	zinc-containing alcohol dehydrogenase NAD dependent ADHB	36	16.93	17.71	19.45	14.22	16.02	15.67	18.03	15.3033	0.848771	0.0467914
NP_215283.1	Rv0769	short chain dehydrogenase	6	14.71	18.18	17.3	17.2	14.24	18.37	16.73	16.6033	0.992429	0.9412
NP_215284.1	Rv0770	dehydrogenase/reductase	1	14.76	17.84	18.74	16.24	16.71	15.7	17.1133	16.2167	0.947604	0.537751
NP_215285.1	Rv0771	4-carboxymuconolactone decarboxylase	2	16.38	18.22	16.08	16.9	14.98	17.44	16.8933	16.44	0.973165	0.674782
NP_215286.1	Rv0772	phosphoribosylamine--glycine ligase	2	16.32	16.66	21.1	15.23	14.65	16.03	18.0267	15.3033	0.848928	0.214044
NP_215290.1	Rv0776c	hypothetical protein Rv0776c	2	10.26	10.54	11.47	21.05	22.66	24.01	10.7567	22.5733	2.09854	0.0017215
NP_215291.1	Rv0777	adenylosuccinate lyase	2	15.7	14.6	18.11	15.93	17.07	18.58	16.1367	17.1933	1.06548	0.462265
NP_215292.1	Rv0778	cytochrome P450 126	5	13.85	14.04	15.33	18	18.39	20.39	14.4067	18.9267	1.31374	0.0105051
NP_215294.1	Rv0780	phosphoribosylaminoimidazole-succinocarboxamide synthase	2	16.13	15.87	18.18	15.79	17.31	16.72	16.7267	16.6067	0.992826	0.896422
NP_215296.2	Rv0781	oligopeptidase B	2	10.03	10.57	9.92	22.89	23.62	22.97	10.1733	23.16	2.27654	2.26693e-06
NP_215299.1	Rv0785	putative FAD-binding dehydrogenase	5	15.79	17.23	17.11	16.32	17	16.55	16.71	16.6233	0.994813	0.875113
NP_215303.1	Rv0788	phosphoribosylformylglycinamidine synthase I	1	14.64	15.18	13.29	19.95	17.92	19.03	14.37	18.9667	1.31988	0.00483995
NP_215305.1	Rv0790c	hypothetical protein Rv0790c	1	9.15	11.76	12.37	22.62	20.14	23.95	11.0933	22.2367	2.00451	0.00181402
NP_215306.1	Rv0791c	hypothetical protein Rv0791c	1	12.07	15.64	16.71	16.98	18.97	19.63	14.8067	18.5267	1.25124	0.0997345
YP_177756.1	Rv0794c	oxidoreductase	1	15.69	13.52	14.26	18.04	20.31	18.18	14.49	18.8433	1.30044	0.0115153
NP_215310.1	Rv0795	transposase IS6110	6	20.53	20.13	19.73	12.56	13.05	14	20.13	13.2033	0.655903	0.000615286
NP_215313.1	Rv0798c	29 kDa antigen CFP29	3	16.92	17.02	16.36	14.63	16.41	18.67	16.7667	16.57	0.98827	0.882839
NP_215314.1	Rv0799c	hypothetical protein Rv0799c	5	15.09	14.64	15.65	18.56	18.91	17.15	15.1267	18.2067	1.20361	0.0141366
NP_215316.1	Rv0801	hypothetical protein Rv0801	8	15.42	14.17	15.75	17.05	18.7	18.9	15.1133	18.2167	1.20534	0.0161224
NP_215318.1	Rv0803	phosphoribosylformylglycinamidine synthase II	8	18.62	16.51	16.49	16.95	16	15.44	17.2067	16.13	0.937427	0.278013
NP_215320.1	Rv0805	hypothetical protein Rv0805	2	7.84	7.58	7.23	24.89	25.28	27.19	7.55	25.7867	3.41545	0.000863036
NP_215321.1	Rv0806c	UDP-glucose-4-epimerase CpsY	6	13.18	12.16	13.06	20.77	19.88	20.94	12.8	20.53	1.60391	7.37479e-05
NP_215323.1	Rv0808	amidophosphoribosyltransferase	2	12.3	12.26	13.07	20.78	19.83	21.75	12.5433	20.7867	1.65719	0.00113362
NP_215324.1	Rv0809	phosphoribosylaminoimidazole synthetase	4	15.37	16.43	17.24	15.51	17.98	17.47	16.3467	16.9867	1.03915	0.531649
NP_215329.1	Rv0814c	hypothetical protein Rv0814c	3	16.66	19.09	14.65	17.89	14.83	16.89	16.8	16.5367	0.984325	0.875683
NP_215330.1	Rv0815c	thiosulfate sulfurtransferase CysA2	43	16.43	17.43	18.5	16.13	15.04	16.46	17.4533	15.8767	0.909664	0.105772
NP_215333.1	Rv0818	transcriptional regulatory protein	3	13.88	13.5	17.32	17.33	19.98	18	14.9	18.4367	1.23736	0.0817647
NP_215335.1	Rv0820	phosphate ABC transporter ATP-binding protein	6	19.83	14.49	17.12	17.09	15.8	15.67	17.1467	16.1867	0.944012	0.602901
NP_215336.1	Rv0821c	phosphate transport regulator	2	16.71	15.31	16.08	16.44	18.61	16.85	16.0333	17.3	1.079	0.194109
NP_215337.1	Rv0822c	hypothetical protein Rv0822c	2	18.1	16.75	20.2	14.55	15.04	15.36	18.35	14.9833	0.81653	0.0715792
YP_177758.1	Rv0824c	acyl-[acyl-carrier protein] desaturase	32	16.41	19.86	18.07	15.67	14.07	15.92	18.1133	15.22	0.840265	0.0812868
NP_215359.1	Rv0844c	nitrate/nitrite response transcriptional regulatory protein NarL	7	14.47	14.54	15.39	17.44	20.12	18.03	14.8	18.53	1.25203	0.0324523
NP_215360.1	Rv0845	two component sensor kinase	3	17.05	15.5	15.51	16.66	17.91	17.37	16.02	17.3133	1.08073	0.117113
NP_215369.1	Rv0854	hypothetical protein Rv0854	4	19.93	17.38	19.05	14.11	15.63	13.91	18.7867	14.55	0.774485	0.0125597
NP_215372.2	Rv0857	hypothetical protein Rv0857	5	12.28	9.49	11.68	21.62	23.92	21.02	11.15	22.1867	1.98984	0.000846455
NP_215373.1	Rv0858c	aminotransferase	1	17.28	22.13	17.7	16.8	11.78	14.32	19.0367	14.3	0.751182	0.0898085
NP_215374.1	Rv0859	acetyl-CoA acetyltransferase	25	18.56	17.12	17.44	15.39	15.7	15.8	17.7067	15.63	0.882718	0.0334941
NP_215375.1	Rv0860	fatty oxidation protein FadB	99	17.11	16.35	17.06	16.35	16.8	16.32	16.84	16.49	0.979216	0.305671
NP_215376.1	Rv0861c	DNA helicase ErcC3	4	11.54	12.62	14.13	19.87	20.21	21.62	12.7633	20.5667	1.61139	0.00164909
NP_215377.1	Rv0862c	hypothetical protein Rv0862c	1	13.86	13.52	15.05	18.57	19.5	19.5	14.1433	19.19	1.35682	0.00152532
NP_215379.1	Rv0864	molybdenum cofactor biosynthesis protein C	1	17.56	16.08	17.23	14.84	18	16.28	16.9567	16.3733	0.965599	0.607753
NP_215384.1	Rv0869c	molybdenum cofactor biosynthesis protein A	2	11.28	9.71	9.74	23.95	22.32	23	10.2433	23.09	2.25415	5.56507e-05
NP_215386.1	Rv0871	cold shock-like protein B CspB	13	20.14	19.95	18.64	14.34	11.73	15.2	19.5767	13.7567	0.702707	0.0175869
NP_215388.1	Rv0873	acyl-CoA dehydrogenase FADE10	35	13.94	14.75	14.27	19.23	18.21	19.59	14.32	19.01	1.32751	0.00174449
NP_215398.1	Rv0883c	hypothetical protein Rv0883c	4	16.79	15.09	15.27	17.88	18.31	16.67	15.7167	17.62	1.1211	0.0599332
NP_215399.1	Rv0884c	phosphoserine aminotransferase	10	20.04	9.02	12.61	20.91	19.99	17.44	13.89	19.4467	1.40005	0.223241
NP_215400.1	Rv0885	hypothetical protein Rv0885	2	9.15	10.1	12.81	18.45	23.92	25.58	10.6867	22.65	2.11946	0.0161874
NP_215401.1	Rv0886	NADPH:adrenodoxin oxidoreductase FprB	1	14.63	17.25	16.91	17.42	15.63	18.15	16.2633	17.0667	1.0494	0.510416
NP_215403.1	Rv0888	hypothetical protein Rv0888	1	21.86	31.23	28.26	4.63	6.45	7.56	27.1167	6.21333	0.229133	0.0113897
NP_215404.1	Rv0889c	citrate synthase 2	4	17.72	18.82	20	13.96	15.19	14.32	18.8467	14.49	0.768836	0.00916839
NP_215407.1	Rv0892	monooxygenase	5	8.15	8.09	8.61	24.5	22.15	28.5	8.28333	25.05	3.02414	0.0115167
NP_215408.1	Rv0893c	hypothetical protein Rv0893c	3	11.85	11.53	13.09	19.78	21.24	22.5	12.1567	21.1733	1.74171	0.00150504
NP_215411.1	Rv0896	type II citrate synthase	27	16.22	18.19	13.41	19.42	14.69	18.07	15.94	17.3933	1.09118	0.502738
NP_215414.1	Rv0899	outer membrane protein A OMPA	6	13.36	14.3	13.36	20.7	18.84	19.44	13.6733	19.66	1.43784	0.00194661
NP_215417.1	Rv0902c	two component sensor histidine kinase PRRB	1	16.54	15.59	16.72	16.32	18.73	16.11	16.2833	17.0533	1.04729	0.466711
NP_215418.1	Rv0903c	two component response transcriptional regulatory protein PRRA	4	17.63	13.41	15.81	18.51	17.3	17.34	15.6167	17.7167	1.13447	0.222007
NP_215420.1	Rv0905	enoyl-CoA hydratase	12	12.63	14.24	15.51	17.74	19.88	20	14.1267	19.2067	1.3596	0.0106131
NP_215423.1	Rv0908	metal cation transporter ATPase P-type CtpE	2	17.15	15.73	16.02	18.49	16.81	15.8	16.3	17.0333	1.04499	0.471095
NP_215424.1	Rv0909	hypothetical protein Rv0909	2	13.89	13.61	13.03	19.67	19.89	19.91	13.51	19.8233	1.46731	0.000711436
NP_215425.1	Rv0910	hypothetical protein Rv0910	3	17.87	14.42	16.35	16.38	18.72	16.26	16.2133	17.12	1.05592	0.51948
NP_215428.1	Rv0913c	dioxygenase	1	15.3	13.74	15.78	18.63	17.96	18.59	14.94	18.3933	1.23115	0.0207832
NP_215429.1	Rv0914c	acetyl-CoA acetyltransferase	1	14.65	13.55	15.95	18	19.47	18.39	14.7167	18.62	1.26523	0.0133892
NP_215435.1	Rv0920c	transposase	2	8.6	8.44	10.38	21.94	24.61	26.03	9.14	24.1933	2.64697	0.00154027
NP_215440.1	Rv0925c	hypothetical protein Rv0925c	1	21.98	20.96	21.04	12.27	11.11	12.65	21.3267	12.01	0.563145	0.000162642
NP_215442.1	Rv0927c	short chain dehydrogenase	2	16.09	17.28	17.61	16.07	16.36	16.59	16.9933	16.34	0.961554	0.290577
YP_177768.1	Rv0928	periplasmic phosphate-binding lipoprotein PSTS3 (PBP-3) (PSTS3) (PHOS1)	5	15.88	14.28	14.32	17.95	19.66	17.91	14.8267	18.5067	1.2482	0.00941735
NP_215446.1	Rv0931c	transmembrane serine/threonine-protein kinase D PKND (protein kinase D) (STPK D)	2	12.48	15.7	16.72	16.45	19.51	19.15	14.9667	18.37	1.22739	0.105905
YP_177769.1	Rv0932c	periplasmic phosphate-binding lipoprotein PSTS2 (PBP-2) (PSTS2)	7	15.2	16.37	16.77	17.31	16.39	17.96	16.1133	17.22	1.06868	0.166568
NP_215448.1	Rv0933	phosphate ABC transporter ATP-binding protein	7	17.46	19.65	21.24	14.25	13.4	14	19.45	13.8833	0.713796	0.0312688
YP_177770.1	Rv0934	periplasmic phosphate-binding lipoprotein PSTS1 (PBP-1) (PSTS1)	11	18.13	17.96	20	13.39	15.97	14.55	18.6967	14.6367	0.782849	0.0154611
NP_215452.1	Rv0937c	hypothetical protein Rv0937c	3	13.8	13.62	14.1	19.41	20.06	19.01	13.84	19.4933	1.40848	0.000673883
NP_215453.1	Rv0938	ATP-dependent DNA ligase	7	8.36	8.36	8.69	22.55	25.6	26.43	8.47	24.86	2.93506	0.0048397
NP_215454.1	Rv0939	bifunctional 2-hydroxyhepta-2,4-diene-1,7-dioate isomerase/cyclase/dehydrase	2	9.88	9.65	10.67	20.87	25.18	23.75	10.0667	23.2667	2.31126	0.00652731
NP_215455.1	Rv0940c	oxidoreductase	4	17.21	18.32	15.58	18.87	13.74	16.28	17.0367	16.2967	0.956564	0.689001
NP_215456.1	Rv0941c	hypothetical protein Rv0941c	1	14.83	14.77	16.29	18.18	17.96	17.97	15.2967	18.0367	1.17912	0.0292204
NP_215460.1	Rv0945	short chain dehydrogenase	5	5.75	6.45	4.64	30.86	22.89	29.41	5.61333	27.72	4.93824	0.00953894
NP_215461.1	Rv0946c	glucose-6-phosphate isomerase	3	11.16	14.94	14.27	17.85	20.39	21.38	13.4567	19.8733	1.47684	0.0152913
NP_215463.1	Rv0948c	hypothetical protein Rv0948c	2	11.92	12.3	10.49	20.92	22.73	21.64	11.57	21.7633	1.88101	0.000182839
YP_177772.1	Rv0949	ATP-dependent DNA helicase II UVRD1	4	13.14	12.46	13.25	19.13	21.71	20.32	12.95	20.3867	1.57426	0.00559926
NP_215466.1	Rv0951	succinyl-CoA synthetase subunit beta	41	18.4	20.11	18	14.89	13.91	14.69	18.8367	14.4967	0.769598	0.0106481
NP_215467.1	Rv0952	succinyl-CoA synthetase subunit alpha	29	21.31	14.97	16.73	16.98	15.17	14.85	17.67	15.6667	0.886625	0.404362
NP_215468.1	Rv0953c	oxidoreductase	3	17.23	19.25	17.23	16.11	14.26	15.93	17.9033	15.4333	0.862037	0.0517922
NP_215470.1	Rv0955	integral membrane protein	1	12.87	12.24	16.43	19.01	17.22	22.22	13.8467	19.4833	1.40708	0.0458882
NP_215472.1	Rv0957	bifunctional phosphoribosylaminoimidazolecarboxamide formyltransferase/IMP cyclohydrolase	7	17.7	21.19	17.02	15.22	13.73	15.14	18.6367	14.6967	0.788589	0.0784056
NP_215474.1	Rv0959	hypothetical protein Rv0959	2	9.38	8.68	9.24	23.81	25.11	23.79	9.1	24.2367	2.66337	9.22448e-05
NP_215482.1	Rv0967	hypothetical protein Rv0967	1	16.36	16.9	17.57	15.78	15.87	17.52	16.9433	16.39	0.967342	0.460823
NP_215483.1	Rv0968	hypothetical protein Rv0968	1	20.84	19.48	21.86	13.31	12.32	12.18	20.7267	12.6033	0.608073	0.0018751
NP_215484.1	Rv0969	metal cation transporter P-type ATPase CtpV	5	16.28	14.9	17.19	15.73	18.43	17.48	16.1233	17.2133	1.0676	0.352728
NP_215487.1	Rv0972c	acyl-CoA dehydrogenase FADE12	6	14.88	16.2	16.94	17.25	17.59	17.14	16.0067	17.3267	1.08247	0.154225
NP_215488.1	Rv0973c	acetyl-/propionyl-coenzyme A carboxylase subunit alpha	1	14.44	16.45	15.07	18.25	17.03	18.76	15.32	18.0133	1.17581	0.0273529
NP_215489.1	Rv0974c	acetyl-/propionyl-CoA carboxylase subunit beta	4	12.66	14.5	15.82	19.4	17.52	20.1	14.3267	19.0067	1.32666	0.0183932
NP_215490.1	Rv0975c	acyl-CoA dehydrogenase FADE13	1	17.48	16.98	17.37	14.96	17.45	15.76	17.2767	16.0567	0.929385	0.235334
YP_177635.1	Rv0979A	50S ribosomal protein L32	1	13.02	12.98	15.81	17.1	20.3	20.8	13.9367	19.4	1.39201	0.0231329
NP_215497.1	Rv0982	two component sensor kinase MprB	1	13	13	12.71	20.08	18.29	22.92	12.9033	20.43	1.58331	0.0300645
NP_215498.1	Rv0983	serine protease PepD	4	14.68	14.64	16.42	15.93	20.16	18.17	15.2467	18.0867	1.18627	0.131035
NP_215499.1	Rv0984	pterin-4-alpha-carbinolamine dehydratase MoaB2	1	5.15	10.41	3.89	20.16	28.41	31.98	6.48333	26.85	4.14139	0.0129937
NP_215501.1	Rv0986	adhesion component transport ATP-binding protein ABC transporter	10	20.98	23.81	22.84	11	10.27	11.11	22.5433	10.7933	0.478782	0.002556
NP_215502.1	Rv0987	adhesion component transport transmembrane protein ABC transporter	2	20.96	22.14	24.07	10.82	10.59	11.41	22.39	10.94	0.488611	0.00393981
NP_215506.1	Rv0991c	putative serine rich protein	4	12.3	18.63	17.65	14.96	15.52	20.94	16.1933	17.14	1.05846	0.747109
NP_215508.1	Rv0993	UTP--glucose-1-phosphate uridylyltransferase GalU	4	18.32	18.07	19.43	14.81	14.59	14.78	18.6067	14.7267	0.791473	0.00988089
NP_215518.1	Rv1002c	hypothetical protein Rv1002c	2	14.04	15.04	13.43	19.27	17.2	21.01	14.17	19.16	1.35215	0.0307096
NP_215519.1	Rv1003	hypothetical protein Rv1003	1	17.99	18.8	17.75	15.37	14.64	15.44	18.18	15.15	0.833333	0.00208355
NP_215522.1	Rv1006	hypothetical protein Rv1006	3	17.39	17.6	18.09	14.43	17.05	15.44	17.6933	15.64	0.883949	0.105983
NP_215526.1	Rv1010	dimethyladenosine transferase	2	18.9	17.2	19.77	14.7	15.23	14.2	18.6233	14.71	0.789869	0.02327
NP_215529.1	Rv1013	acyl-CoA synthetase	8	15.28	14.25	16.85	17.17	18.29	18.17	15.46	17.8767	1.15632	0.0670702
NP_215530.1	Rv1014c	peptidyl-tRNA hydrolase	1	23.83	12.95	15.62	18.21	15.33	14.06	17.4667	15.8667	0.908397	0.683319
NP_215531.1	Rv1015c	50S ribosomal protein L25/general stress protein Ctc	22	19.72	20.47	19.48	12.37	13.56	14.39	19.89	13.44	0.675716	0.00235038
NP_215532.1	Rv1016c	lipoprotein LpqT	2	19.03	17.36	16.91	14.9	15.65	16.15	17.7667	15.5667	0.876173	0.0553865
NP_215533.1	Rv1017c	ribose-phosphate pyrophosphokinase	14	18.1	19.09	19.74	12.83	15.38	14.86	18.9767	14.3567	0.756543	0.0116153
NP_215534.1	Rv1018c	UDP-N-acetylglucosamine pyrophosphorylase glmU	6	13.52	15.46	17.29	17.66	16.33	19.74	15.4233	17.91	1.16123	0.167232
NP_215535.1	Rv1019	TetR family transcriptional regulator	2	16	14.71	15.18	16.42	19.88	17.81	15.2967	18.0367	1.17912	0.0984378
NP_215536.1	Rv1020	transcription-repair coupling factor Mfd (TRCF)	3	18.02	13.61	17.18	17.19	16.81	17.19	16.27	17.0633	1.04876	0.617273
NP_215537.1	Rv1021	nucleoside triphosphate pyrophosphohydrolase	2	16.6	18.45	16.8	15.93	15.96	16.26	17.2833	16.05	0.92864	0.166415
NP_215539.1	Rv1023	phosphopyruvate hydratase	4	17.7	18.42	18.31	15.57	14.81	15.19	18.1433	15.19	0.837222	0.000709161
NP_215541.1	Rv1025	hypothetical protein Rv1025	1	36.14	26.14	0	0	17.43	20.29	20.76	12.5733	0.605652	0.556117
NP_215545.1	Rv1029	potassium-transporting ATPase subunit A	1	13.71	15.73	20.8	15.41	17.47	16.87	16.7467	16.5833	0.990247	0.9466
NP_215546.1	Rv1030	potassium-transporting ATPase subunit B	2	19.49	15.91	14.72	17.33	16.96	15.59	16.7067	16.6267	0.995211	0.962089
NP_215553.1	Rv1037c	putative ESAT-6 like protein ESXI (ESAT-6 like protein 1)	1	12.68	8.48	12.11	20.72	22.54	23.47	11.09	22.2433	2.00571	0.00385805
NP_215559.1	Rv1043c	hypothetical protein Rv1043c	2	13.65	14.74	14.12	18.99	19.7	18.79	14.17	19.16	1.35215	0.000315451
NP_215563.1	Rv1047	transposase	1	8.22	7.79	9.15	24.78	24.75	25.32	8.38667	24.95	2.97496	6.9382e-05
NP_215572.1	Rv1056	hypothetical protein Rv1056	2	12.81	16.35	13.83	20.05	17.95	19	14.33	19	1.32589	0.0277028
NP_215574.1	Rv1058	acyl-CoA synthetase	2	16.27	15.11	17.03	16.57	17.42	17.6	16.1367	17.1967	1.06569	0.192486
NP_215575.1	Rv1059	hypothetical protein Rv1059	5	13.1	12.73	13.78	20.56	18.91	20.93	13.2033	20.1333	1.52487	0.00236669
NP_215576.1	Rv1060	hypothetical protein Rv1060	2	14.52	13.14	15.02	17.92	20.3	19.1	14.2267	19.1067	1.34302	0.00596675
NP_215585.1	Rv1069c	hypothetical protein Rv1069c	4	16.02	14.33	15.07	17	18.41	19.17	15.14	18.1933	1.20167	0.0213416
NP_215586.1	Rv1070c	enoyl-CoA hydratase	6	19.33	17.67	16.73	15.21	16.7	14.36	17.91	15.4233	0.861158	0.0725256
NP_215587.1	Rv1071c	enoyl-CoA hydratase	3	13.55	20.35	16.71	18.71	13.39	17.29	16.87	16.4633	0.975894	0.880303
NP_215588.1	Rv1072	transmembrane protein	14	2.38	2.87	1.64	35.02	25.07	33.01	2.29667	31.0333	13.5123	0.0101965
NP_215590.1	Rv1074c	acetyl-CoA acetyltransferase	15	17.91	19	17.12	16.11	14.73	15.14	18.01	15.3267	0.851009	0.0196244
YP_177782.1	Rv1077	cystathionine beta-synthase CBS (Serine sulfhydrase) (Beta-thionase) (hemoprotein H-450)	20	15.89	17.67	17.59	16.68	15.77	16.41	17.05	16.2867	0.95523	0.323515
NP_215594.1	Rv1078	proline-rich antigen	3	17.7	15.44	18.48	17.7	14.95	15.73	17.2067	16.1267	0.937234	0.428291
NP_215596.1	Rv1080c	transcription elongation factor GreA	12	17.9	20.16	16.94	15.1	14.26	15.63	18.3333	14.9967	0.818	0.0567088
NP_215598.1	Rv1082	Mycothiol conjugate amidase Mca (Mycothiol S-conjugate amidase)	2	12.64	14.84	14.31	18.8	19.23	20.18	13.93	19.4033	1.39292	0.00418776
NP_215602.1	Rv1086	short (C15) chain Z-isoprenyl diphosphate synthase (Z-FPP synthase) (Z-farnesyl diphosphate synthase) (Z-FPP synthetase) (Z-farnesyl diphosphate synthetase) (geranyltranstransferase) (farnesyl pyrophosphate synthetase)	4	14.2	13.77	14.79	19.15	19.05	19.06	14.2533	19.0867	1.3391	0.00340989
YP_177787.1	Rv1093	serine hydroxymethyltransferase	19	14.99	14.72	15.33	16.98	19.84	18.14	15.0133	18.32	1.22025	0.0521649
NP_215610.1	Rv1094	acyl-[acyl-carrier protein] desaturase	2	17.57	16.75	19.6	15.48	15.37	15.24	17.9733	15.3633	0.854785	0.0901865
NP_215611.1	Rv1095	PhoH-like protein PhoH2 (phosphate starvation-inducible protein PsiH)	1	16.62	16.52	17.93	15.6	16.46	16.87	17.0233	16.31	0.958097	0.29445
NP_215612.1	Rv1096	glycosyl hydrolase	3	16.45	18.45	19.02	14.32	16.09	15.66	17.9733	15.3567	0.854414	0.0577158
NP_215613.1	Rv1097c	hypothetical protein Rv1097c	2	16.24	18.33	16.51	16.77	15.78	16.37	17.0267	16.3067	0.957713	0.395286
NP_215614.1	Rv1098c	fumarate hydratase	9	13.82	16.39	19.59	15.33	17.36	17.51	16.6	16.7333	1.00803	0.946438
NP_215615.1	Rv1099c	fructose 1,6-bisphosphatase II	12	17.48	20.27	16.58	15.71	14.24	15.71	18.11	15.22	0.84042	0.105447
NP_215616.1	Rv1100	hypothetical protein Rv1100	3	13.9	14.93	12.79	20.8	18.62	18.95	13.8733	19.4567	1.40245	0.00379276
NP_215622.1	Rv1106c	cholesterol dehydrogenase	2	16.22	17.78	22.69	12.25	16.95	14.11	18.8967	14.4367	0.76398	0.142562
NP_215623.1	Rv1107c	exodeoxyribonuclease VII small subunit	1	15.19	18.14	17.37	13.38	17.2	18.74	16.9	16.44	0.972781	0.816367
NP_215624.1	Rv1108c	exodeoxyribonuclease VII large subunit	1	15.44	14.2	15.6	19.06	17.5	18.2	15.08	18.2533	1.21043	0.00738113
NP_215625.1	Rv1109c	hypothetical protein Rv1109c	8	15.2	11.88	13.75	18.97	21.01	19.19	13.61	19.7233	1.44918	0.00887132
YP_177788.1	Rv1110	4-hydroxy-3-methylbut-2-enyl diphosphate reductase	3	10.78	13.16	11.77	20.14	18.25	25.9	11.9033	21.43	1.80034	0.0440479
NP_215628.1	Rv1112	GTP-dependent nucleic acid-binding protein EngD	6	16.58	17.2	18.95	15.86	16.29	15.12	17.5767	15.7567	0.896454	0.107601
NP_215629.1	Rv1113	hypothetical protein Rv1113	4	13.16	15.84	14.59	18.64	17.23	20.55	14.53	18.8067	1.29433	0.0276482
NP_215633.1	Rv1117	hypothetical protein Rv1117	1	15.88	13.74	14.11	18.14	19.64	18.48	14.5767	18.7533	1.28653	0.00894424
NP_215634.1	Rv1118c	hypothetical protein Rv1118c	3	16.78	15.08	14.92	17.92	17.77	17.54	15.5933	17.7433	1.13788	0.0642964
NP_215638.1	Rv1122	6-phosphogluconate dehydrogenase-like protein	6	13.6	15.19	16.29	16.71	18.54	19.67	15.0267	18.3067	1.21828	0.0483979
NP_215639.1	Rv1123c	peroxidase BpoB	3	10.01	7.44	7.19	27.07	24.2	24.09	8.21333	25.12	3.05844	0.000227608
NP_215642.1	Rv1126c	hypothetical protein Rv1126c	2	12.16	12.61	14.15	19.97	20.96	20.15	12.9733	20.36	1.56937	0.00173847
NP_215644.1	Rv1128c	hypothetical protein Rv1128c	3	3.86	4.44	4.41	25.92	31.05	30.32	4.23667	29.0967	6.86782	0.00372982
NP_215645.1	Rv1129c	transcriptional regulator protein	2	10.05	8.87	10.54	21.25	25.56	23.73	9.82	23.5133	2.39443	0.00355663
NP_215646.1	Rv1130	hypothetical protein Rv1130	2	21.22	21.32	24.36	11.14	9.86	12.1	22.3	11.0333	0.494768	0.00164348
NP_215648.1	Rv1132	hypothetical protein Rv1132	1	12.52	13.13	14.18	19.98	19.46	20.73	13.2767	20.0567	1.51067	0.000534395
NP_215649.1	Rv1133c	5-methyltetrahydropteroyltriglutamate--homocysteine S-methyltransferase	11	17.37	20.17	20.05	14.73	12.44	15.24	19.1967	14.1367	0.736413	0.015849
NP_215657.1	Rv1141c	enoyl-CoA hydratase	2	17.59	17.22	19.28	14.87	15.89	15.15	18.03	15.3033	0.848771	0.0327838
NP_215658.1	Rv1142c	enoyl-CoA hydratase	4	17.17	10.43	12.7	21.08	19.21	19.41	13.4333	19.9	1.48139	0.0718842
NP_215659.1	Rv1143	alpha-methylacyl-CoA racemase	4	20.92	18.81	20.17	12.53	14.31	13.27	19.9667	13.37	0.669616	0.00137724
NP_215660.1	Rv1144	short-chain type dehydrogenase/reductase	6	17.46	17.53	18.56	14.36	16.57	15.52	17.85	15.4833	0.867414	0.0450261
NP_215663.1	Rv1147	hypothetical protein Rv1147	1	18.37	18.57	19.78	14.28	14.96	14.04	18.9067	14.4267	0.763047	0.00210134
NP_215664.1	Rv1148c	hypothetical protein Rv1148c	6	7.14	6.41	6.1	26.29	26.63	27.43	6.55	26.7833	4.08906	1.70873e-06
NP_215668.1	Rv1152	transcriptional regulatory protein	3	16.77	16.92	17.57	15.76	17.07	15.9	17.0867	16.2433	0.950644	0.171794
NP_215670.1	Rv1154c	hypothetical protein Rv1154c	2	15.32	14.78	16.64	16.86	18.53	17.87	15.58	17.7533	1.1395	0.0426284
NP_215672.1	Rv1156	hypothetical protein Rv1156	10	14.15	14.73	13.92	17.59	19.3	20.31	14.2667	19.0667	1.33645	0.0191411
NP_215677.1	Rv1161	respiratory nitrate reductase subunit alpha NarG	3	17.68	19.14	19.67	13.7	14.3	15.51	18.83	14.5033	0.770225	0.00581922
NP_215678.1	Rv1162	respiratory nitrate reductase subunit beta NarH	5	20.52	19.18	20.8	11.54	14.59	13.38	20.1667	13.17	0.653058	0.00535503
NP_215681.1	Rv1165	GTP-binding translation elongation factor TypA	11	16.65	16.03	17.45	17	16.27	16.59	16.71	16.62	0.994614	0.858079
NP_215682.1	Rv1166	lipoprotein LpqW	1	17.46	18.48	19.93	13.98	15.67	14.48	18.6233	14.71	0.789869	0.014178
YP_177792.1	Rv1169c	PE family protein	1	7.04	6.96	5.36	23.81	28.14	28.69	6.45333	26.88	4.16529	0.00259915
NP_215689.1	Rv1173	FO synthase	2	10.44	11.45	13.34	19.05	21.01	24.71	11.7433	21.59	1.83849	0.0134443
NP_215691.1	Rv1175c	NADPH dependent 2,4-dienoyl-CoA reductase	7	11.8	11.95	12.07	20.89	21.38	21.91	11.94	21.3933	1.79174	0.000481736
NP_215697.1	Rv1181	polyketide beta-ketoacyl synthase PKS4	1	16.64	15.64	18.83	16.04	16.8	16.07	17.0367	16.3033	0.956956	0.521702
NP_215698.1	Rv1182	polyketide synthase associated protein PapA3	1	7.36	8.05	6.54	25.41	25.33	27.31	7.31667	26.0167	3.55581	5.15517e-05
NP_215699.1	Rv1183	transmembrane transport protein MmpL10	1	14.19	13.48	16.72	18.36	18.89	18.36	14.7967	18.5367	1.25276	0.0585285
NP_215701.1	Rv1185c	acyl-CoA synthetase	7	14.73	16.49	18.72	15.23	17.25	17.59	16.6467	16.69	1.0026	0.976526
NP_215703.1	Rv1187	pyrroline-5-carboxylate dehydrogenase ROCA	4	16.36	17.38	15.92	17.65	16.07	16.62	16.5533	16.78	1.01369	0.738682
NP_215707.1	Rv1191	hypothetical protein Rv1191	1	14.28	17.64	20.84	15.29	16.11	15.83	17.5867	15.7433	0.895186	0.433403
NP_215708.1	Rv1192	hypothetical protein Rv1192	6	15.83	16.57	18.84	15.47	16.4	16.89	17.08	16.2533	0.9516	0.471445
NP_215709.1	Rv1193	acyl-CoA synthetase	2	19.2	12.88	16.31	18.62	15.61	17.38	16.13	17.2033	1.06654	0.634303
YP_177796.1	Rv1202	succinyl-diaminopimelate desuccinylase	4	14.45	15.26	14.62	18.6	18.38	18.68	14.7767	18.5533	1.25558	0.00174259
NP_215722.1	Rv1206	acyl-CoA synthetase	1	20.15	18.97	18.71	13.98	14.12	14.07	19.2767	14.0567	0.729206	0.00675538
NP_215723.1	Rv1207	dihydropteroate synthase 2 FolP2	2	9.48	9.75	9.41	21.95	23.63	25.79	9.54667	23.79	2.49197	0.00569677
NP_215725.1	Rv1209	hypothetical protein Rv1209	1	10.99	10.59	12	22.9	20.27	23.26	11.1933	22.1433	1.97826	0.00255008
NP_215729.1	Rv1213	glucose-1-phosphate adenylyltransferase	3	14.06	13.87	14.83	18.3	20.25	18.69	14.2533	19.08	1.33863	0.00590439
NP_215731.1	Rv1215c	hypothetical protein Rv1215c	1	13.08	15.23	16.79	16.55	18.53	19.82	15.0333	18.3	1.21729	0.086211
NP_215734.1	Rv1218c	tetronasin-transport ATP-binding protein ABC transporter	4	17.35	15.68	17.66	15.37	17.5	16.44	16.8967	16.4367	0.972776	0.624803
NP_215735.1	Rv1219c	transcriptional regulatory protein	1	16.74	16.95	15.26	16.91	16.51	17.63	16.3167	17.0167	1.0429	0.336753
NP_215739.2	Rv1223	serine protease HtrA	17	15.4	14.07	14.21	18.44	19.63	18.25	14.56	18.7733	1.28938	0.00222181
NP_215745.1	Rv1229c	MRP family ATP-binding protein	1	15.2	18.7	14.12	18.46	16.12	17.4	16.0067	17.3267	1.08247	0.455952
NP_215748.1	Rv1232c	hypothetical protein Rv1232c	4	14.23	13.91	14.29	18.67	20.09	18.81	14.1433	19.19	1.35682	0.0053295
NP_215750.1	Rv1234	hypothetical protein Rv1234	3	14.8	14.62	16.08	17.43	19.18	17.89	15.1667	18.1667	1.1978	0.0130603
NP_215754.1	Rv1238	sugar-transport ATP-binding protein ABC transporter SugC	6	12.61	12.86	12.88	20.4	20.63	20.62	12.7833	20.55	1.60756	3.70304e-07
NP_215755.1	Rv1239c	magnesium/cobalt transporter CorA	4	12.83	11.99	12.68	20.1	20.32	22.08	12.5	20.8333	1.66667	0.0020247
NP_215756.1	Rv1240	malate dehydrogenase	12	16.63	19.25	17.25	15.45	15.63	15.78	17.71	15.62	0.881988	0.116197
NP_215757.1	Rv1241	hypothetical protein Rv1241	2	12.7	12.3	10.42	22.94	20.34	21.3	11.8067	21.5267	1.82326	0.000735377
NP_215761.1	Rv1245c	short-chain type dehydrogenase/reductase	13	15.89	14.72	15.07	17.06	20.12	17.14	15.2267	18.1067	1.18914	0.0908914
NP_215764.2	Rv1248c	alpha-ketoglutarate decarboxylase	48	15.63	14.63	17.98	16.33	17.99	17.43	16.08	17.25	1.07276	0.369937
NP_215765.1	Rv1249c	hypothetical protein Rv1249c	3	11.67	10.73	9.93	23.61	21.14	22.92	10.7767	22.5567	2.0931	0.000390617
NP_215767.1	Rv1251c	hypothetical protein Rv1251c	1	20.44	21.65	24.1	10.33	11.08	12.4	22.0633	11.27	0.510802	0.00260774
NP_215768.1	Rv1252c	lipoprotein LprE	1	21.25	21.23	22.15	12.4	10.99	11.98	21.5433	11.79	0.547269	8.98467e-05
NP_215769.1	Rv1253	cold-shock DEAD-box protein A	4	12.41	12.38	12.54	20.98	20.21	21.49	12.4433	20.8933	1.67908	0.00165754
NP_215772.1	Rv1256c	cytochrome P450 130 CYP130	1	7.67	7.06	6.59	24.43	27.26	26.98	7.10667	26.2233	3.68996	0.000837865
NP_215773.1	Rv1257c	oxidoreductase	3	14.42	13.06	15.73	18.1	20.02	18.67	14.4033	18.93	1.31428	0.0111759
NP_215777.1	Rv1261c	hypothetical protein Rv1261c	5	14.68	17.21	14.46	17.1	18.27	18.28	15.45	17.8833	1.1575	0.0934596
NP_215780.1	Rv1264	adenylyl cyclase	1	11.44	12.39	17.18	18.79	18.73	21.48	13.67	19.6667	1.43867	0.057944
NP_215781.1	Rv1265	hypothetical protein Rv1265	4	10.85	9.65	10.01	20.93	25.5	23.05	10.17	23.16	2.27729	0.00692442
NP_215782.1	Rv1266c	transmembrane serine/threonine-protein kinase H	8	14.17	12.83	13.85	18.91	20.64	19.59	13.6167	19.7133	1.44774	0.000869273
NP_215783.1	Rv1267c	transcriptional regulatory protein EMBR	2	17.47	17.39	19.03	15.33	15.2	15.59	17.9633	15.3733	0.855817	0.0350193
NP_215786.1	Rv1270c	lipoprotein LprA	20	16.41	15.62	16.75	16.18	18.37	16.67	16.26	17.0733	1.05002	0.354881
NP_215790.1	Rv1274	lipoprotein LprB	5	14.34	13.22	14.73	17.8	20.87	19.04	14.0967	19.2367	1.36463	0.0146663
NP_215791.1	Rv1275	lipoprotein LprC	4	12.1	11.58	14.38	18.53	20.99	22.42	12.6867	20.6467	1.62743	0.00620073
NP_215794.1	Rv1278	hypothetical protein Rv1278	9	9.05	13.48	10.82	21.5	19.74	25.41	11.1167	22.2167	1.9985	0.00749412
NP_215795.1	Rv1279	dehydrogenase FAD flavoprotein GMC oxidoreductase	2	18.29	16.87	18.12	14.58	17.31	14.83	17.76	15.5733	0.876877	0.112152
NP_215797.1	Rv1281c	oligopeptide-transport ATP-binding protein ABC transporter OppD	2	17.64	16.21	18.43	15.27	17.27	15.17	17.4267	15.9033	0.912586	0.181829
NP_215798.1	Rv1282c	oligopeptide-transport integral membrane protein ABC transporter OppC	1	17	13	16.65	16.98	18.88	17.48	15.55	17.78	1.14341	0.217087
NP_215800.1	Rv1284	hypothetical protein Rv1284	3	14.75	18.1	19.62	13.41	15.85	18.28	17.49	15.8467	0.906042	0.459818
NP_215802.1	Rv1286	bifunctional sulfate adenylyltransferase subunit 1/adenylylsulfate kinase protein	8	16.03	16.51	16.97	17.76	15.72	17.01	16.5033	16.83	1.01979	0.654373
NP_215805.1	Rv1289	hypothetical protein Rv1289	3	16.35	18.19	18.75	16.07	15.4	15.24	17.7633	15.57	0.876525	0.0809187
NP_215808.1	Rv1292	arginyl-tRNA synthetase	8	14.49	14.86	16.57	16.97	18.82	18.3	15.3067	18.03	1.17792	0.0332204
NP_215809.1	Rv1293	diaminopimelate decarboxylase LysA	3	13.24	15.34	14.19	18.91	17.75	20.57	14.2567	19.0767	1.33809	0.0110669
NP_215810.1	Rv1294	homoserine dehydrogenase	7	15.17	15.47	14.95	18.81	17.06	18.55	15.1967	18.14	1.19368	0.0257421
NP_215811.1	Rv1295	threonine synthase	26	14.15	13.84	13.57	18.58	21	18.86	13.8533	19.48	1.40616	0.0145848
NP_215812.1	Rv1296	homoserine kinase	1	11.2	17.17	14.86	16.96	18.89	20.92	14.41	18.9233	1.31321	0.106551
NP_215813.1	Rv1297	transcription termination factor Rho	32	16.87	18.74	20.32	12.98	15.33	15.75	18.6433	14.6867	0.78777	0.040931
NP_215814.1	Rv1298	50S ribosomal protein L31	1	16.43	16.31	14.29	18.46	17.15	17.35	15.6767	17.6533	1.12609	0.0851112
NP_215815.1	Rv1299	peptide chain release factor 1	8	16.53	17.86	17.02	16.83	15.22	16.54	17.1367	16.1967	0.945147	0.213615
NP_215819.1	Rv1303	hypothetical protein Rv1303	1	17.88	17.84	16.26	17.19	17.06	13.77	17.3267	16.0067	0.923817	0.368368
NP_215822.1	Rv1306	F0F1 ATP synthase subunit B	5	19.48	17.28	17.79	16.36	14.38	14.72	18.1833	15.1533	0.833364	0.0287424
NP_215823.1	Rv1307	F0F1 ATP synthase subunit delta	3	18.15	17	16.85	15.88	16.2	15.91	17.3333	15.9967	0.922885	0.0750864
NP_215824.1	Rv1308	F0F1 ATP synthase subunit alpha	72	16.93	17.52	17.91	14.87	16.39	16.39	17.4533	15.8833	0.910046	0.0699278
NP_215825.1	Rv1309	F0F1 ATP synthase subunit gamma	5	18.22	19.88	18.49	14.98	13.81	14.62	18.8633	14.47	0.767097	0.00339989
NP_215826.1	Rv1310	F0F1 ATP synthase subunit beta	38	17.36	18.49	18.87	14.83	15.27	15.19	18.24	15.0967	0.827668	0.0142159
NP_215827.1	Rv1311	F0F1 ATP synthase subunit epsilon	3	15.42	19.54	18.98	14.45	16	15.6	17.98	15.35	0.853726	0.168625
NP_215830.1	Rv1314c	hypothetical protein Rv1314c	2	13.08	14.78	13.31	18.18	21.25	19.41	13.7233	19.6133	1.4292	0.00861397
NP_215832.1	Rv1316c	methylated-DNA--protein-cysteine methyltransferase	2	12.07	14.9	13.85	18.07	20.9	20.21	13.6067	19.7267	1.44978	0.00672665
YP_177643.1	Rv1322A	hypothetical protein Rv1322A	1	8.98	8.85	8.34	24.36	24.19	25.28	8.72333	24.61	2.82117	1.88925e-05
NP_215839.1	Rv1323	acetyl-CoA acetyltransferase	10	17.04	16.7	15.82	15.75	18.52	16.17	16.52	16.8133	1.01776	0.776556
NP_215840.1	Rv1324	thioredoxin	6	16.55	15.18	17.64	15.87	17.83	16.94	16.4567	16.88	1.02572	0.667025
NP_215842.1	Rv1326c	glycogen branching enzyme	2	14.02	15.63	15.64	17.07	18.24	19.39	15.0967	18.2333	1.20777	0.0235306
NP_215844.1	Rv1328	glycogen phosphorylase GlgP	3	17.94	17.01	16.35	16.71	15.48	16.51	17.1	16.2333	0.949318	0.223444
NP_215846.2	Rv1330c	nicotinate phosphoribosyltransferase	1	12.83	11.91	14.27	19.79	19.71	21.49	13.0033	20.33	1.56345	0.00138649
NP_215847.1	Rv1331	ATP-dependent Clp protease adaptor protein ClpS	14	7.97	7.65	6.74	25.38	27.37	24.89	7.45333	25.88	3.47227	0.000264221
NP_215850.1	Rv1334	hypothetical protein Rv1334	4	13	16.44	12.9	18.79	18.74	20.12	14.1133	19.2167	1.3616	0.0348382
NP_215851.1	Rv1335	9.5 kDa culture filtrate antigen CFP10A	1	13.1	13.53	14.99	17.31	20.61	20.46	13.8733	19.46	1.40269	0.018835
NP_215852.1	Rv1336	cysteine synthase B CysM	3	14.02	13.75	14.72	18.35	19.93	19.24	14.1633	19.1733	1.35373	0.00162347
NP_215855.1	Rv1339	hypothetical protein Rv1339	2	19.2	20.15	20.04	13.57	13.76	13.28	19.7967	13.5367	0.683785	0.000460326
NP_215856.1	Rv1340	ribonuclease PH	2	16.45	16.54	17.84	15.31	16.17	17.69	16.9433	16.39	0.967342	0.546384
NP_215859.1	Rv1343c	lipoprotein LprD	1	9.55	5.47	6.19	27.22	25.33	26.24	7.07	26.2633	3.71476	0.00127738
NP_215866.1	Rv1350	3-ketoacyl-(acyl-carrier-protein) reductase	3	12.72	14.25	10.42	21.86	20.19	20.56	12.4633	20.87	1.67451	0.00789193
NP_215869.1	Rv1353c	transcriptional regulatory protein	1	16.92	11.91	12.28	19.67	19.46	19.76	13.7033	19.63	1.4325	0.0662287
NP_215876.1	Rv1360	oxidoreductase	5	17.23	17.6	18.51	14.79	16.42	15.44	17.78	15.55	0.874578	0.023147
NP_215878.1	Rv1362c	hypothetical protein Rv1362c	2	15.35	14	16.5	17.45	18.64	18.05	15.2833	18.0467	1.18081	0.0439154
NP_215879.1	Rv1363c	hypothetical protein Rv1363c	4	13.98	13.05	15.82	17.63	20.08	19.44	14.2833	19.05	1.33372	0.0124433
NP_215882.1	Rv1366	hypothetical protein Rv1366	4	17.87	15	17.8	15.72	17.46	16.15	16.89	16.4433	0.973554	0.706068
NP_215883.1	Rv1367c	hypothetical protein Rv1367c	3	14.46	13.68	15.6	18.53	18.19	19.55	14.58	18.7567	1.28647	0.00498101
NP_215884.1	Rv1368	lipoprotein LprF	10	18.62	17.13	18.03	15.5	15.57	15.15	17.9267	15.4067	0.859427	0.0210148
NP_215893.1	Rv1377c	putative transferase	4	14.46	14.4	14.16	18.88	19.58	18.52	14.34	18.9933	1.3245	0.00245168
YP_177804.1	Rv1384	carbamoyl phosphate synthase large subunit	11	17.63	18.8	21.85	14.19	14.26	13.26	19.4267	13.9033	0.715683	0.0409621
YP_177806.1	Rv1387	PPE family protein	1	22.12	25.91	22.82	7.27	10.05	11.84	23.6167	9.72	0.411574	0.00151759
NP_215904.1	Rv1388	putative integration host factor MIHF	33	17.32	17.35	14.04	17.19	15.52	18.58	16.2367	17.0967	1.05297	0.576339
NP_215905.1	Rv1389	guanylate kinase	1	13.52	20.29	19.21	15.31	15.34	16.32	17.6733	15.6567	0.885892	0.438848
NP_215906.1	Rv1390	DNA-directed RNA polymerase subunit omega	5	20.81	14.22	15.21	16.03	16.45	17.27	16.7467	16.5833	0.990247	0.944281
NP_215907.1	Rv1391	bifunctional phosphopantothenoylcysteine decarboxylase/phosphopantothenate synthase	2	18.82	21.28	18.85	13.36	14.06	13.63	19.65	13.6833	0.696353	0.0139204
NP_215908.1	Rv1392	S-adenosylmethionine synthetase	31	18.95	21.22	19	13.89	13.96	12.98	19.7233	13.61	0.690046	0.00702193
NP_215909.1	Rv1393c	monoxygenase	2	14.2	15.33	18.03	17.86	17.38	17.19	15.8533	17.4767	1.1024	0.287889
NP_215914.1	Rv1398c	hypothetical protein Rv1398c	1	16.19	15.74	13.81	18.81	17.52	17.92	15.2467	18.0833	1.18605	0.0407776
NP_215921.1	Rv1405c	putative methyltransferase	1	18.32	12.02	22.5	20.02	13.14	14	17.6133	15.72	0.892506	0.641726
NP_215922.1	Rv1406	methionyl-tRNA formyltransferase	1	14.63	17.22	14.81	18.56	17.97	16.81	15.5533	17.78	1.14316	0.0991523
NP_215924.1	Rv1408	ribulose-phosphate 3-epimerase	1	14.13	19.41	14.99	19.31	14.7	17.45	16.1767	17.1533	1.06038	0.668952
NP_215925.1	Rv1409	bifunctional diaminohydroxyphosphoribosylaminopyrimidine deaminase/5-amino-6-(5-phosphoribosylamino) uracil reductase	5	15.36	21.19	14.66	18.6	13.24	16.95	17.07	16.2633	0.952744	0.773442
NP_215926.1	Rv1410c	aminoglycosides/tetracycline-transport integral membrane protein	2	15.21	12.69	13.56	19.72	21.03	17.79	13.82	19.5133	1.41196	0.0101926
NP_215927.1	Rv1411c	lipoprotein LprG	17	16.53	16.3	16.9	16.65	16.75	16.86	16.5767	16.7533	1.01066	0.423295
NP_215931.1	Rv1415	bifunctional 3,4-dihydroxy-2-butanone 4-phosphate synthase/GTP cyclohydrolase II protein	5	15.56	15.42	16	17.09	19.05	16.88	15.66	17.6733	1.12857	0.0924076
NP_215932.1	Rv1416	6,7-dimethyl-8-ribityllumazine synthase	5	12.41	14.84	13.68	19.34	19.14	20.59	13.6433	19.69	1.4432	0.00344632
NP_215936.1	Rv1420	excinuclease ABC subunit C	4	13.13	12.74	14.2	19.79	19	21.13	13.3567	19.9733	1.49538	0.00154322
NP_215937.1	Rv1421	hypothetical protein Rv1421	2	12.44	17.39	15.81	17.88	15.76	20.72	15.2133	18.12	1.19106	0.228895
NP_215938.1	Rv1422	hypothetical protein Rv1422	1	16.81	15.72	14.74	17.44	18.4	16.89	15.7567	17.5767	1.11551	0.0759941
NP_215939.1	Rv1423	transcriptional regulatory protein WHIA	4	16.66	14.39	17.4	16.02	18.91	16.62	16.15	17.1833	1.06398	0.459265
NP_215941.1	Rv1425	hypothetical protein Rv1425	3	15.46	11.84	13.81	20.25	19.76	18.87	13.7033	19.6267	1.43225	0.019109
NP_215943.1	Rv1427c	acyl-CoA synthetase	4	12.83	14.23	16.62	17.75	18.44	20.14	14.56	18.7767	1.28961	0.0409973
NP_215944.1	Rv1428c	hypothetical protein Rv1428c	1	17.14	17.97	18.7	14.53	16.15	15.52	17.9367	15.4	0.858576	0.017769
NP_215947.1	Rv1431	hypothetical protein Rv1431	2	6.83	6.96	6.99	24.27	26.69	28.25	6.92667	26.4033	3.81184	0.00346701
NP_215952.1	Rv1436	glyceraldehyde-3-phosphate dehydrogenase	42	16.35	15.7	16.49	16.3	18.07	17.08	16.18	17.15	1.05995	0.190145
NP_215953.1	Rv1437	phosphoglycerate kinase	15	14.36	17.15	15.12	17.85	16.64	18.9	15.5433	17.7967	1.14497	0.104197
NP_215954.1	Rv1438	triosephosphate isomerase	13	17.69	15.56	16.24	17.84	16.06	16.62	16.4967	16.84	1.02081	0.697214
NP_215962.1	Rv1446c	putative OXPP cycle protein OPCA	6	10.76	10.45	11.89	20.2	23.9	22.79	11.0333	22.2967	2.02085	0.00416691
NP_215963.1	Rv1447c	glucose-6-phosphate 1-dehydrogenase	6	19.74	12.68	13.94	19	17.43	17.21	15.4533	17.88	1.15703	0.38131
NP_215964.1	Rv1448c	transaldolase	16	15.98	16.36	17.91	16.4	16.88	16.47	16.75	16.5833	0.99005	0.80738
NP_215965.1	Rv1449c	transketolase	27	14.92	13.33	16.53	17.35	19.68	18.18	14.9267	18.4033	1.23292	0.0432856
NP_215970.1	Rv1454c	quinone reductase	11	16.7	16.37	16.39	16.6	17.27	16.67	16.4867	16.8467	1.02184	0.229033
NP_215974.1	Rv1458c	unidentified antibiotic-transport ATP-binding protein ABC transporter	1	20.42	21.91	21.57	12.82	10.92	12.36	21.3	12.0333	0.564945	0.000300387
NP_215977.1	Rv1461	hypothetical protein Rv1461	24	14.46	15.09	15.22	18.2	18.36	18.68	14.9233	18.4133	1.23386	0.000662438
NP_215978.1	Rv1462	hypothetical protein Rv1462	2	12.72	14.59	15.63	18.67	19.13	19.26	14.3133	19.02	1.32883	0.026949
NP_215979.1	Rv1463	ABC transporter ATP-binding protein	8	17.74	16.26	18.35	15.72	16.69	15.24	17.45	15.8833	0.91022	0.114841
NP_215981.1	Rv1465	nitrogen fixation related protein	3	15.78	15.99	16.64	16.55	17.63	17.4	16.1367	17.1933	1.06548	0.0682613
NP_215982.1	Rv1466	hypothetical protein Rv1466	2	17.64	18.53	17.98	15.14	16.02	14.69	18.05	15.2833	0.846722	0.00634121
NP_215983.1	Rv1467c	acyl-CoA dehydrogenase FADE15	4	18.59	19.66	19	13.81	14.39	14.54	19.0833	14.2467	0.74655	0.000401354
NP_215986.1	Rv1470	thioredoxin TRXA	5	12.95	13.05	11.9	22.16	19.64	20.3	12.6333	20.7	1.63852	0.00274809
YP_177815.1	Rv1471	thioredoxin TRXB1	8	5.64	7.95	4.66	29.34	21.37	31.05	6.08333	27.2533	4.48	0.0126434
NP_215989.1	Rv1473	macrolide ABC transporter ATP-binding protein	3	18.44	17.13	18.63	14.79	16.07	14.94	18.0667	15.2667	0.845018	0.0113357
NP_215991.1	Rv1475c	aconitate hydratase	52	16.18	16.99	17.35	16.54	15.73	17.21	16.84	16.4933	0.979414	0.564291
NP_215992.1	Rv1476	hypothetical protein Rv1476	1	16.92	14.89	18.78	15.14	17.48	16.78	16.8633	16.4667	0.976478	0.781603
NP_215993.1	Rv1477	invasion protein	5	22.29	23.98	23.06	9.81	10.6	10.27	23.11	10.2267	0.442521	0.000232516
YP_177816.1	Rv1479	transcriptional regulatory protein MOXR1	15	13.46	14.16	14.95	19.18	19.06	19.19	14.19	19.1433	1.34907	0.00704305
NP_215996.1	Rv1480	hypothetical protein Rv1480	3	15.86	15.89	14.23	18.25	17.08	18.69	15.3267	18.0067	1.17486	0.0219286
NP_215997.1	Rv1481	hypothetical protein Rv1481	6	13.68	13.95	14.91	17.18	19.4	20.88	14.18	19.1533	1.35073	0.032593
NP_215999.1	Rv1483	3-oxoacyl-[acyl-carrier protein] reductase FabG1	5	16.24	18.26	13.96	18.94	15.39	17.21	16.1533	17.18	1.06356	0.559606
NP_216000.1	Rv1484	enoyl-(acyl carrier protein) reductase	11	18.07	16.77	16.36	16.12	15.82	16.86	17.0667	16.2667	0.953125	0.268266
NP_216003.1	Rv1487	hypothetical protein Rv1487	4	16.04	13.57	15.66	17.84	19.72	17.18	15.09	18.2467	1.20919	0.0432447
NP_216004.1	Rv1488	hypothetical protein Rv1488	20	15.08	13.66	14.98	18.24	18.02	20.02	14.5733	18.76	1.28728	0.00760292
NP_216009.1	Rv1493	methylmalonyl-CoA mutase	8	12.33	11.06	11.51	21.46	22.27	21.36	11.6333	21.6967	1.86504	4.51554e-05
NP_216011.1	Rv1495	hypothetical protein Rv1495	1	15.1	16.38	16.53	14.7	15.56	21.73	16.0033	17.33	1.0829	0.612552
NP_216012.1	Rv1496	arginine/ornithine transport system ATPase	1	19.6	14.32	19.75	13.11	15.42	17.8	17.89	15.4433	0.863238	0.340369
NP_216013.1	Rv1497	esterase LipL	1	15.28	14.64	17.13	17.42	16.89	18.64	15.6833	17.65	1.1254	0.104793
NP_216016.1	Rv1500	glycosyltransferase	3	9.52	10.11	10.45	21.89	20.46	27.57	10.0267	23.3067	2.32447	0.0242297
NP_216023.1	Rv1507c	hypothetical protein Rv1507c	3	19.43	20.7	19.9	13.44	12.98	13.55	20.01	13.3233	0.665834	0.000672525
NP_216025.1	Rv1509	hypothetical protein Rv1509	2	13.62	15.58	18.79	15.05	17.56	19.41	15.9967	17.34	1.08398	0.533121
NP_216027.1	Rv1511	GDP-D-mannose dehydratase gmdA (GDP-mannose 4,6 dehydratase) (GMD)	3	17.15	16.17	17.24	15.38	17.92	16.14	16.8533	16.48	0.977848	0.68439
NP_216029.1	Rv1513	hypothetical protein Rv1513	1	14.56	15.09	18.18	15.85	20.16	16.16	15.9433	17.39	1.09074	0.465815
NP_216031.1	Rv1515c	hypothetical protein Rv1515c	1	11.41	16.85	12.52	17.45	18.33	23.44	13.5933	19.74	1.45218	0.0705298
NP_216032.2	Rv1516c	sugar transferase	5	16.31	16.63	20.32	15.67	15.51	15.56	17.7533	15.58	0.877582	0.233133
NP_216037.1	Rv1521	acyl-CoA synthetase	19	15.23	16.08	16.54	15.56	18.02	18.57	15.95	17.3833	1.08986	0.258469
NP_216038.1	Rv1522c	transmembrane transport protein MmpL12	4	13.27	12.93	13.7	18.78	20.04	21.29	13.3	20.0367	1.50652	0.00709083
NP_216043.1	Rv1527c	polyketide synthase pks5	7	20.67	19.93	22.58	11.85	12.63	12.34	21.06	12.2733	0.582779	0.0049531
NP_216048.1	Rv1532c	hypothetical protein Rv1532c	1	14.43	18.67	12.9	17.63	20.39	15.98	15.3333	18	1.17391	0.288212
NP_216049.1	Rv1533	hypothetical protein Rv1533	1	17.77	17.08	19.01	14.69	17.18	14.27	17.9533	15.38	0.856665	0.086433
NP_216050.1	Rv1534	transcriptional regulator	2	16.97	17.03	18.3	14.97	17.08	15.65	17.4333	15.9	0.912046	0.121517
NP_216052.1	Rv1536	isoleucyl-tRNA synthetase	6	14.91	17.24	17.05	16.6	16.83	17.37	16.4	16.9333	1.03252	0.555402
NP_216059.1	Rv1543	fatty acyl-CoA reductase	12	13.1	12.35	12.53	20.74	21.43	19.85	12.66	20.6733	1.63296	0.000648207
NP_216060.1	Rv1544	ketoacyl reductase	1	13.26	17.8	11.95	20.17	16.88	19.94	14.3367	18.9967	1.32504	0.102001
NP_216062.1	Rv1546	hypothetical protein Rv1546	9	17.63	18.27	19.54	13.82	16.05	14.69	18.48	14.8533	0.803752	0.0139976
NP_216063.1	Rv1547	DNA polymerase III subunit alpha	16	16.51	17.68	21.28	14.03	14.85	15.65	18.49	14.8433	0.802776	0.115064
NP_216074.1	Rv1558	hypothetical protein Rv1558	13	12.34	15	15.83	19.22	16.61	20.99	14.39	18.94	1.31619	0.0530635
NP_216075.1	Rv1559	threonine dehydratase	2	15.75	17.01	16.57	16.64	16.78	17.26	16.4433	16.8933	1.02737	0.357514
YP_177821.1	Rv1564c	maltooligosyltrehalose synthase TreX	1	15.62	16.74	18.94	15.54	16.78	16.38	17.1	16.2333	0.949318	0.475963
NP_216081.1	Rv1565c	hypothetical protein Rv1565c	3	17.8	16.56	16.36	16.24	16.63	16.4	16.9067	16.4233	0.971412	0.396656
NP_216082.1	Rv1566c	inv protein	4	26.35	27.63	26.31	6.73	6.4	6.58	26.7633	6.57	0.245485	0.00026342
NP_216084.1	Rv1568	adenosylmethionine--8-amino-7-oxononanoate transaminase	1	19.05	20.57	17.88	14.48	13.9	14.12	19.1667	14.1667	0.73913	0.0195424
NP_216102.1	Rv1586c	phiRv1 integrase	12	14.95	14.74	14.89	17.42	18.76	19.25	14.86	18.4767	1.24338	0.0209714
NP_216109.1	Rv1593c	hypothetical protein Rv1593c	4	16.58	15.07	16.76	16.5	18.03	17.07	16.1367	17.2	1.0659	0.204318
NP_216110.1	Rv1594	quinolinate synthetase	13	11.08	12.95	10.94	24.22	18.44	22.37	11.6567	21.6767	1.85959	0.0176334
NP_216112.1	Rv1596	nicotinate-nucleotide pyrophosphorylase	5	17.47	17.67	17.38	17.1	15.13	15.24	17.5067	15.8233	0.903846	0.116492
NP_216114.1	Rv1598c	hypothetical protein Rv1598c	5	15.33	12.5	13.7	19.89	19.81	18.77	13.8433	19.49	1.4079	0.0104502
YP_177823.1	Rv1600	histidinol-phosphate aminotransferase	1	16.27	15.34	13.59	19.07	17.47	18.26	15.0667	18.2667	1.21239	0.0347392
NP_216119.1	Rv1603	phosphoribosyl isomerase A	6	15.58	17.75	17.34	16.01	17.94	15.39	16.89	16.4467	0.973752	0.685575
NP_216121.1	Rv1605	imidazole glycerol phosphate synthase subunit HisF	1	16.91	16.22	17.16	15.34	17.59	16.77	16.7633	16.5667	0.988268	0.802903
NP_216124.1	Rv1608c	peroxidoxin BcpB	22	14.95	14.54	14.46	17.67	19.66	18.73	14.65	18.6867	1.27554	0.0148297
NP_216125.1	Rv1609	anthranilate synthase component I	8	15.78	16.8	15.91	16.92	16.72	17.87	16.1633	17.17	1.06228	0.103711
NP_216127.1	Rv1611	indole-3-glycerol-phosphate synthase	11	15.81	16.32	16.07	15.99	18.29	17.52	16.0667	17.2667	1.07469	0.213988
NP_216128.1	Rv1612	tryptophan synthase subunit beta	8	19.93	20.24	17.69	13.91	14.06	14.17	19.2867	14.0467	0.72831	0.0219138
NP_216133.1	Rv1617	pyruvate kinase	18	17.01	19.46	14.65	17.87	13.71	17.3	17.04	16.2933	0.956182	0.714963
NP_216134.1	Rv1618	acyl-CoA thioesterase II TesB1	5	12.26	11.37	12.81	20.01	21.76	21.78	12.1467	21.1833	1.74396	0.000411222
YP_177824.1	Rv1623c	integral membrane cytochrome D ubiquinol oxidase (subunit I) cydA (cytochrome bd-I oxidase subunit I)	2	18.91	15.43	18.69	14.91	16.47	15.59	17.6767	15.6567	0.885725	0.20697
NP_216141.2	Rv1625c	membrane-anchored adenylyl cyclase Cya (ATP pyrophosphate-lyase) (adenylate cyclase)	1	12.34	12.05	12.71	21.14	20.69	21.07	12.3667	20.9667	1.69542	8.01195e-06
NP_216142.1	Rv1626	two-component system transcriptional regulator	22	19.77	18.11	17.87	15	14.69	14.56	18.5833	14.75	0.793722	0.0195228
NP_216143.1	Rv1627c	lipid-transfer protein	5	16.19	17.21	18.01	16.44	15.71	16.45	17.1367	16.2	0.945341	0.210733
NP_216144.1	Rv1628c	hypothetical protein Rv1628c	5	15.39	15.67	15.59	17.4	18.75	17.21	15.55	17.7867	1.14384	0.0404842
NP_216145.1	Rv1629	DNA polymerase I	8	15.99	16.68	15.77	17.75	17.01	16.8	16.1467	17.1867	1.06441	0.059249
NP_216146.1	Rv1630	30S ribosomal protein S1	79	18.98	19.61	19.6	13.66	14.04	14.1	19.3967	13.9333	0.718336	7.69445e-05
NP_216149.1	Rv1633	excinuclease ABC subunit B	10	10.06	9.65	10.35	22.11	24.04	23.78	10.02	23.31	2.32635	0.00081646
NP_216151.1	Rv1635c	transmembrane protein	2	10.75	9.56	11.81	21.82	23.02	23.06	10.7067	22.6333	2.11395	0.000301375
NP_216152.1	Rv1636	hypothetical protein Rv1636	19	17.63	19.44	20.61	12.77	15.08	14.47	19.2267	14.1067	0.733703	0.0110928
NP_216153.1	Rv1637c	hypothetical protein Rv1637c	5	13.33	15.3	16.29	17.74	18.29	19.05	14.9733	18.36	1.22618	0.0435893
NP_216154.1	Rv1638	excinuclease ABC subunit A	19	14.18	14.92	15.36	18.15	18.1	19.29	14.82	18.5133	1.24921	0.00217861
NP_216156.1	Rv1640c	lysyl-tRNA synthetase	2	16.41	16.37	15.94	16.99	17.52	16.76	16.24	17.09	1.05234	0.0420138
NP_216157.1	Rv1641	translation initiation factor IF-3	11	20.16	21.58	22.26	11.2	12.99	11.81	21.3333	12	0.5625	0.000376424
NP_216159.1	Rv1643	50S ribosomal protein L20	12	14.5	17.67	16.49	17.3	16.47	17.57	16.22	17.1133	1.05508	0.442054
NP_216160.1	Rv1644	23S rRNA methyltransferase TsnR	2	15.96	16.88	18.91	14.87	16.06	17.31	17.25	16.08	0.932174	0.357773
NP_216163.1	Rv1647	hypothetical protein Rv1647	1	18.74	16.54	19.23	13.66	16.76	15.06	18.17	15.16	0.834342	0.0695047
NP_216170.1	Rv1654	acetylglutamate kinase	1	16.11	16.32	18.51	14.92	17.18	16.94	16.98	16.3467	0.962701	0.579074
NP_216172.1	Rv1656	ornithine carbamoyltransferase	1	16.33	16.36	18.64	14.69	17	16.98	17.11	16.2233	0.948178	0.458961
NP_216174.1	Rv1658	argininosuccinate synthase	10	17.44	18.37	19.49	14.52	14.72	15.47	18.4333	14.9033	0.808499	0.0138849
NP_216175.1	Rv1659	argininosuccinate lyase	2	16.52	16.22	19	15.29	16.9	16.06	17.2467	16.0833	0.932547	0.326373
NP_216176.1	Rv1660	chalcone synthase	1	19.52	17.73	20.81	13.19	15.32	13.43	19.3533	13.98	0.722356	0.0103225
NP_216181.1	Rv1665	chalcone synthase	2	17.11	22.36	18.86	15.02	12.27	14.37	19.4433	13.8867	0.714212	0.0489241
NP_216203.1	Rv1687c	ABC transporter ATP-binding protein	2	14.57	14.38	15.81	18.15	18.88	18.21	14.92	18.4133	1.23414	0.00612562
NP_216211.1	Rv1695	inorganic polyphosphate/ATP-NAD kinase	3	16.63	18.11	16.36	16.58	15.83	16.49	17.0333	16.3	0.956947	0.312036
NP_216213.1	Rv1697	hypothetical protein Rv1697	6	16.01	16.89	14.77	18.78	15.75	17.81	15.89	17.4467	1.09797	0.233136
NP_216214.1	Rv1698	hypothetical protein Rv1698	1	23.07	22.11	26.13	9.19	9.29	10.2	23.77	9.56	0.402188	0.00472517
NP_216215.1	Rv1699	CTP synthetase	3	13.5	15.63	13.97	18.2	18.82	19.88	14.3667	18.9667	1.32019	0.0058706
NP_216218.1	Rv1702c	hypothetical protein Rv1702c	2	12.98	15.03	14.34	19.12	17.68	20.85	14.1167	19.2167	1.36128	0.0136175
NP_216219.1	Rv1703c	catechol-o-methyltransferase	4	16.19	15.01	17.02	15.82	19.07	16.89	16.0733	17.26	1.07383	0.360556
NP_216223.1	Rv1707	transmembrane protein	3	17.02	16.42	17.08	17.99	14.31	17.17	16.84	16.49	0.979216	0.785249
NP_216224.1	Rv1708	putative initiation inhibitor protein	5	16.02	17.7	17.52	15.82	17.14	15.81	17.08	16.2567	0.951795	0.30192
NP_216226.1	Rv1710	hypothetical protein Rv1710	1	18.64	17.08	17.51	15.68	15.77	15.32	17.7433	15.59	0.87864	0.0349133
NP_216229.1	Rv1713	GTP-binding protein EngA	1	18.7	16.02	20.22	14.39	16.42	14.25	18.3133	15.02	0.820167	0.0972773
NP_216235.1	Rv1719	transcriptional regulatory protein	1	15.75	18.6	19.2	13.47	15.52	17.46	17.85	15.4833	0.867414	0.206215
NP_216238.1	Rv1722	biotin carboxylase-like protein	1	17.41	17.95	18.05	15.15	16.02	15.42	17.8033	15.53	0.872309	0.00275404
NP_214748.2	Rv1731	succinic semialdehyde dehydrogenase	16	14.31	13.83	16.67	17.36	19.13	18.7	14.9367	18.3967	1.23164	0.0376498
NP_216257.1	Rv1741	hypothetical protein Rv1741	1	1.96	1.51	0.61	32.59	30.78	32.55	1.36	31.9733	23.5098	7.37231e-06
NP_216259.1	Rv1743	transmembrane serine/threonine-protein kinase E	4	15.54	15.14	16.79	15.33	19.6	17.61	15.8233	17.5133	1.1068	0.304502
NP_216261.1	Rv1745c	isopentenyl-diphosphate delta-isomerase	1	16.08	16.78	17.62	16.97	15.18	17.37	16.8267	16.5067	0.980983	0.714935
NP_216263.1	Rv1747	transmembrane ATP-binding protein ABC transporter	5	13.14	13.32	14.58	18.46	20.23	20.27	13.68	19.6533	1.43665	0.00178754
NP_216264.1	Rv1748	hypothetical protein Rv1748	1	11.98	11.77	12.64	20.31	22.46	20.85	12.13	21.2067	1.74828	0.00180445
NP_216266.1	Rv1750c	acyl-CoA synthetase	2	12.25	11.98	12.3	20.96	20.31	22.2	12.1767	21.1567	1.73748	0.00298552
NP_216267.1	Rv1751	hypothetical protein Rv1751	9	14.87	13.94	16.07	16.8	19.82	18.49	14.96	18.37	1.22794	0.0386441
NP_216270.1	Rv1754c	hypothetical protein Rv1754c	1	24.41	27.31	27.98	6.71	7.58	6.02	26.5667	6.77	0.254831	0.000906668
NP_216281.1	Rv1765c	hypothetical protein Rv1765c	1	3.74	3.34	2.61	29.14	31.81	29.36	3.23	30.1033	9.31992	0.000248371
NP_216282.2	Rv1766	hypothetical protein Rv1766	1	11.66	12.25	11.35	16.99	23.22	24.53	11.7533	21.58	1.83607	0.0500656
NP_216285.1	Rv1769	hypothetical protein Rv1769	4	16.53	18.46	17.55	15.31	16.16	16	17.5133	15.8233	0.903502	0.0755796
NP_216290.1	Rv1774	oxidoreductase	2	20.09	22.18	26.21	9.59	10.67	11.26	22.8267	10.5067	0.46028	0.0153587
NP_216294.1	Rv1778c	hypothetical protein Rv1778c	3	17.1	17.44	20.36	14.73	15.84	14.52	18.3	15.03	0.821311	0.0718148
NP_216295.1	Rv1779c	integral membrane protein	5	11.51	10.79	11.26	20.74	23.04	22.66	11.1867	22.1467	1.97974	0.00227304
NP_216296.1	Rv1780	hypothetical protein Rv1780	2	24.54	13.44	17.56	15.38	14.28	14.81	18.5133	14.8233	0.800684	0.37266
NP_216298.1	Rv1782	hypothetical protein Rv1782	2	15.68	10.46	13.77	21.1	18.91	20.08	13.3033	20.03	1.50564	0.0332206
NP_216299.1	Rv1783	hypothetical protein Rv1783	5	10.57	10.5	12	21.97	21.8	23.16	11.0233	22.31	2.02389	7.28275e-05
NP_216300.1	Rv1784	hypothetical protein Rv1784	7	10.02	11.28	11.91	20.92	22.24	23.63	11.07	22.2633	2.01114	0.000540314
YP_177835.1	Rv1789	PPE family protein	1	17.26	15.58	20.79	14.99	16.11	15.26	17.8767	15.4533	0.864442	0.25237
NP_216310.1	Rv1794	hypothetical protein Rv1794	8	12.9	15.63	17.24	18.32	16.74	19.17	15.2567	18.0767	1.18484	0.143245
NP_216312.1	Rv1796	proline rich membrane-anchored mycosin MYCP5 (serine protease) (subtilisin-like protease) (subtilase-like) (mycosin-5)	3	17.96	18.01	18.38	14.74	16	14.91	18.1167	15.2167	0.839926	0.0114293
NP_216313.1	Rv1797	hypothetical protein Rv1797	2	15.17	14.54	15.89	18.14	17.86	18.4	15.2	18.1333	1.19298	0.00919545
NP_216314.1	Rv1798	hypothetical protein Rv1798	3	16.31	14.59	17.61	16.58	18.26	16.65	16.17	17.1633	1.06143	0.399957
YP_177845.1	Rv1809	PPE family protein	1	16.64	15.06	20.02	14.54	18.34	15.41	17.24	16.0967	0.933681	0.573843
NP_216328.1	Rv1812c	dehydrogenase	1	13.54	15.91	18.46	15.93	17.81	18.35	15.97	17.3633	1.08725	0.447698
NP_216329.1	Rv1813c	hypothetical protein Rv1813c	1	15.25	14.78	14.12	18.37	19.21	18.27	14.7167	18.6167	1.26501	0.00095635
NP_216330.1	Rv1814	membrane-bound C-5 sterol desaturase erg3 (sterol-c5-desaturase)	1	8.44	7.51	7.74	25.38	25.6	25.34	7.89667	25.44	3.22161	8.921e-05
NP_216333.1	Rv1817	hypothetical protein Rv1817	3	16.87	18.03	16.8	16.6	15.5	16.21	17.2333	16.1033	0.934429	0.095205
NP_216335.1	Rv1819c	drugs-transport transmembrane ATP-binding protein ABC transporter	6	15.91	15.39	16	17.25	18.13	17.31	15.7667	17.5633	1.11395	0.00903715
NP_216337.1	Rv1821	preprotein translocase subunit SecA	8	12.9	12.87	13.09	20.05	20.83	20.26	12.9533	20.38	1.57334	0.000416698
NP_216341.1	Rv1825	hypothetical protein Rv1825	2	17.75	16.59	17.75	15.89	16.01	16.01	17.3633	15.97	0.919754	0.0676343
NP_216343.1	Rv1827	hypothetical protein Rv1827	7	13.89	17.27	14.06	21.66	13.64	19.48	15.0733	18.26	1.21141	0.318374
NP_216344.1	Rv1828	hypothetical protein Rv1828	1	10.31	9.81	8.5	24.4	23.31	23.66	9.54	23.79	2.49371	0.000106134
NP_216345.1	Rv1829	hypothetical protein Rv1829	3	16.03	14.06	12.76	20.85	18.59	17.71	14.2833	19.05	1.33372	0.0232881
NP_216348.1	Rv1832	glycine dehydrogenase	5	17.42	18.52	19.19	15.39	14.58	14.9	18.3767	14.9567	0.813894	0.0111214
NP_216349.1	Rv1833c	haloalkane dehalogenase	2	16.38	17.55	18.36	14.4	17.39	15.92	17.43	15.9033	0.912412	0.225096
NP_216352.1	Rv1836c	hypothetical protein Rv1836c	3	12.07	18.02	13.38	22.21	13.36	20.96	14.49	18.8433	1.30044	0.268271
NP_216353.1	Rv1837c	malate synthase G	48	17.21	18.49	16.08	17.28	15.26	15.69	17.26	16.0767	0.931441	0.272478
NP_216359.1	Rv1843c	inosine 5-monophosphate dehydrogenase	6	16.38	15.99	15.46	18.21	17.21	16.75	15.9433	17.39	1.09074	0.0572223
NP_216366.1	Rv1850	urease subunit alpha	3	11.03	16.21	18.52	17.15	16.85	20.24	15.2533	18.08	1.18531	0.337139
NP_216368.1	Rv1852	urease accessory protein ureG	2	15.99	14.17	14.95	19.53	17.83	17.54	15.0367	18.3	1.21703	0.0168698
NP_216370.1	Rv1854c	NADH dehydrogenase	16	5.68	6.2	7.44	23.96	27.09	29.63	6.44	26.8933	4.17598	0.00343663
NP_216372.1	Rv1856c	short chain dehydrogenase	3	16.63	19.17	17.91	14.39	16.06	15.84	17.9033	15.43	0.861851	0.0576767
YP_177849.1	Rv1860	hypothetical protein Rv1860	8	19.46	21.88	20.26	12.18	12.56	13.66	20.5333	12.8	0.623377	0.00170595
NP_216380.1	Rv1864c	hypothetical protein Rv1864c	2	11.13	12.64	9.81	24.12	18.99	23.31	11.1933	22.14	1.97796	0.008906
NP_216381.1	Rv1865c	short chain dehydrogenase	10	16.44	16.11	16.53	17.03	17.22	16.66	16.36	16.97	1.03729	0.0460495
NP_216383.1	Rv1867	acetyl-CoA acetyltransferase	2	18.67	15.74	17.73	15.08	16.21	16.57	17.38	15.9533	0.917913	0.238795
NP_216385.1	Rv1869c	reductase	5	13.28	14.66	13.82	18.7	20.12	19.41	13.92	19.41	1.3944	0.000668027
NP_216388.1	Rv1872c	L-lactate dehydrogenase (cytochrome) LldD2	4	18.69	17.89	20.32	13.54	15.36	14.2	18.9667	14.3667	0.757469	0.00827658
NP_216392.1	Rv1876	bacterioferritin	5	16.71	15.85	15.13	17.73	17.97	16.62	15.8967	17.44	1.09709	0.0673987
NP_216398.1	Rv1882c	short chain dehydrogenase	2	17.26	16.65	18.83	16.77	15.42	15.07	17.58	15.7533	0.896094	0.0961256
NP_216401.1	Rv1885c	chorismate mutase	1	17	19.86	18.82	13.49	14.86	15.98	18.56	14.7767	0.796157	0.0274688
NP_216402.1	Rv1886c	secreted antigen 85-B fbpB (85B) (antigen 85 complex B) (Mycolyl transferase 85B) (fibronectin-binding protein B) (extracellular alpha-antigen)	11	16.79	19.8	19.82	12.6	15.6	15.39	18.8033	14.53	0.772735	0.0376831
NP_216409.1	Rv1893	hypothetical protein Rv1893	7	16.61	16.95	16.68	16.82	15.8	17.13	16.7467	16.5833	0.990247	0.72785
NP_216410.1	Rv1894c	hypothetical protein Rv1894c	11	15.96	12.48	14.24	19.14	18.96	19.21	14.2267	19.1033	1.34278	0.0392603
NP_216412.1	Rv1896c	hypothetical protein Rv1896c	6	18.76	15.33	16.84	16.45	16.94	15.68	16.9767	16.3567	0.963479	0.605902
NP_216413.1	Rv1897c	D-tyrosyl-tRNA(Tyr) deacylase	1	16.83	16.1	16.26	16.67	17.33	16.82	16.3967	16.94	1.03314	0.143393
NP_216414.1	Rv1898	hypothetical protein Rv1898	3	11.81	11.66	12.31	19.02	23.44	21.76	11.9267	21.4067	1.79486	0.0162092
NP_216417.1	Rv1901	competence damage-inducible protein A	3	15.61	15.61	17.99	15.7	17.59	17.5	16.4033	16.93	1.03211	0.629267
NP_216424.1	Rv1908c	catalase-peroxidase-peroxynitritase T KATG	62	17.02	17.73	18.09	15.37	16.09	15.7	17.6133	15.72	0.892506	0.0106273
NP_216428.1	Rv1912c	oxidoreductase FADB5	2	14.34	11.58	13.4	19.8	21.1	19.78	13.1067	20.2267	1.54323	0.00412859
NP_216429.1	Rv1913	hypothetical protein Rv1913	1	12.15	11.67	11.97	20.24	21.56	22.41	11.93	21.4033	1.79408	0.00311981
NP_216430.1	Rv1914c	hypothetical protein Rv1914c	1	11.83	12.22	13.01	18.44	22.23	22.28	12.3533	20.9833	1.6986	0.0157073
NP_216431.1	Rv1915	isocitrate lyase	4	2.25	2.26	1.79	32.47	29.29	31.93	2.1	31.23	14.8714	0.000888612
NP_216432.1	Rv1916	isocitrate lyase	2	3.17	2.87	2.77	25.38	30.89	34.92	2.93667	30.3967	10.3507	0.00988124
NP_216435.1	Rv1919c	hypothetical protein Rv1919c	9	12.91	13.86	15.8	18.64	19.29	19.5	14.19	19.1433	1.34907	0.0207862
NP_216438.1	Rv1922	lipoprotein	3	12.74	10.93	12.7	20.3	22.44	20.88	12.1233	21.2067	1.74924	0.000496487
NP_216439.1	Rv1923	lipase LIPD	9	19.14	18.02	17.84	15.06	15.86	14.09	18.3333	15.0033	0.818364	0.00799903
NP_216441.1	Rv1925	acyl-CoA synthetase	9	12.6	17.43	16.52	16.52	18.56	18.37	15.5167	17.8167	1.14823	0.258334
NP_216442.1	Rv1926c	immunogenic protein MPT63 (antigen MPT63/MPB63) (16 kDa immunoprotective extracellular protein)	1	15.05	19.69	13.88	19.58	14.82	16.98	16.2067	17.1267	1.05677	0.704204
NP_216444.1	Rv1928c	short chain dehydrogenase	2	11.14	14.44	16.68	17.41	17.98	22.35	14.0867	19.2467	1.3663	0.0828009
NP_216448.1	Rv1932	thiol peroxidase	12	16.87	16.65	17.01	15.64	17.09	16.75	16.8433	16.4933	0.97922	0.510909
NP_216453.1	Rv1937	oxygenase	2	13.63	15.6	17	16.35	18.35	19.08	15.41	17.9267	1.16331	0.121534
NP_216461.1	Rv1945	hypothetical protein Rv1945	1	4.46	4.61	3.4	30.48	28.6	28.45	4.15667	29.1767	7.01925	3.45367e-05
NP_216471.1	Rv1955	hypothetical protein Rv1955	3	15.08	19.12	17.86	16.33	14.72	16.89	17.3533	15.98	0.920861	0.384713
NP_216472.1	Rv1956	transcriptional regulatory protein	6	10.28	11.26	8	23.6	23.21	23.64	9.84667	23.4833	2.3849	0.00432789
NP_216478.1	Rv1962c	hypothetical protein Rv1962c	1	16.5	13.52	20.35	16.61	15.68	17.34	16.79	16.5433	0.985309	0.913534
NP_216479.1	Rv1963c	transcriptional repressor (probably TETR-family) MCE3R	2	18.54	18.34	18.75	14.67	14.45	15.26	18.5433	14.7933	0.797771	0.000943733
NP_216493.1	Rv1977	hypothetical protein Rv1977	9	14.3	12.63	13.89	19.49	20.02	19.66	13.6067	19.7233	1.44953	0.00373623
NP_216494.1	Rv1978	hypothetical protein Rv1978	4	13.9	12.52	15.05	16.93	20.8	20.8	13.8233	19.51	1.41138	0.0284167
NP_216496.1	Rv1980c	immunogenic protein MPT64 (antigen MPT64/MPB64)	6	15.96	19.34	16.87	16.74	14.27	16.82	17.39	15.9433	0.91681	0.333887
YP_177853.1	Rv1981c	ribonucleotide-diphosphate reductase subunit beta	5	15.41	14.91	15.13	16.86	19.5	18.19	15.15	18.1833	1.20022	0.0532098
NP_216508.1	Rv1992c	metal cation transporter P-type ATPase G CtpG	1	9.71	11.64	9.22	26.61	16.34	26.49	10.19	23.1467	2.27151	0.056748
NP_216509.1	Rv1993c	hypothetical protein Rv1993c	1	18.14	21.9	19.25	13.97	13.21	13.53	19.7633	13.57	0.686625	0.0271492
NP_216512.1	Rv1996	hypothetical protein Rv1996	2	15.58	16.09	14.18	18.8	17.92	17.44	15.2833	18.0533	1.18124	0.0204207
NP_216514.1	Rv1998c	hypothetical protein Rv1998c	2	11.86	11.01	13	20.22	23.14	20.77	11.9567	21.3767	1.78784	0.00180616
NP_216516.1	Rv2000	hypothetical protein Rv2000	4	18.36	21.39	16.22	16.27	12.07	15.69	18.6567	14.6767	0.786671	0.117871
NP_216518.1	Rv2002	20-beta-hydroxysteroid dehydrogenase	7	11.68	13.36	12.81	19.9	21	21.25	12.6167	20.7167	1.64201	0.000276014
NP_216532.1	Rv2016	hypothetical protein Rv2016	4	5.75	4.89	4.59	23.85	30.86	30.05	5.07667	28.2533	5.56533	0.00781264
NP_216533.1	Rv2017	transcriptional regulatory protein	1	10.1	9.91	9.54	27.11	20.55	22.79	9.85	23.4833	2.38409	0.0187595
NP_216544.1	Rv2028c	hypothetical protein Rv2028c	1	15.1	14.28	15.48	19.09	17.4	18.65	14.9533	18.38	1.22916	0.00712237
NP_216547.1	Rv2031c	heat shock protein hspX	28	1.9	1.94	1.66	31.24	31	32.27	1.83333	31.5033	17.1836	8.73697e-05
NP_216557.1	Rv2041c	sugar-binding lipoprotein	1	12.66	14.8	15.44	17.72	19.18	20.21	14.3	19.0367	1.33124	0.0135465
NP_216558.1	Rv2042c	hypothetical protein Rv2042c	1	12.63	10.22	11.86	20.96	23.53	20.79	11.57	21.76	1.88073	0.00105519
NP_216564.1	Rv2048c	polyketide synthase pks12	6	15.26	14.58	15.51	16.77	19.94	17.93	15.1167	18.2133	1.20485	0.0685263
NP_216566.1	Rv2050	hypothetical protein Rv2050	1	11.04	10.67	9.26	21.37	22.66	25	10.3233	23.01	2.22893	0.00184057
NP_216567.1	Rv2051c	polyprenol-monophosphomannose synthase Ppm1	8	14.86	13.63	16.03	17.94	19.24	18.31	14.84	18.4967	1.24641	0.0174335
NP_216570.1	Rv2054	hypothetical protein Rv2054	3	19.47	16.83	16.97	15.9	17.12	13.7	17.7567	15.5733	0.877041	0.174596
NP_216577.1	Rv2061c	hypothetical protein Rv2061c	15	16.02	16.82	15.32	18.23	16.49	17.12	16.0533	17.28	1.07641	0.142083
NP_216583.1	Rv2067c	hypothetical protein Rv2067c	4	20.82	20.22	21.76	12.29	12.58	12.33	20.9333	12.4	0.592357	0.00197733
NP_216584.1	Rv2068c	class A BETA-lactamase BLAC	8	16.58	16.06	16.21	17.3	16.41	17.44	16.2833	17.05	1.04708	0.125441
NP_216590.1	Rv2074	hypothetical protein Rv2074	1	12.9	20.96	14.24	18.45	13.63	19.81	16.0333	17.2967	1.07879	0.707747
NP_216595.1	Rv2079	hypothetical protein Rv2079	2	3.13	2.7	2.98	31.55	28.94	30.7	2.93667	30.3967	10.3507	0.000588736
NP_216598.1	Rv2082	hypothetical protein Rv2082	1	16.62	13.16	16.84	17.95	17.85	17.58	15.54	17.7933	1.145	0.198283
NP_216599.1	Rv2083	hypothetical protein Rv2083	1	11.08	16	16.32	16.67	20.79	19.15	14.4667	18.87	1.30438	0.108937
NP_216605.1	Rv2089c	dipeptidase PepE	2	12.5	12.09	11.4	20.54	21.06	22.4	11.9967	21.3333	1.77827	0.000486132
NP_216607.1	Rv2091c	hypothetical protein Rv2091c	23	12	12.68	14.98	18.5	20.28	21.56	13.22	20.1133	1.52143	0.00551293
NP_216608.1	Rv2092c	ATP-dependent DNA helicase HelY	2	16.36	15.75	18	16.11	17.14	16.64	16.7033	16.63	0.99561	0.927305
NP_216610.1	Rv2094c	twin arginine translocase protein A	6	14.61	11.32	11.72	19.85	22.02	20.49	12.55	20.7867	1.65631	0.00467156
NP_216613.1	Rv2097c	hypothetical protein Rv2097c	11	15.49	16.03	15.9	18.5	15.88	18.2	15.8067	17.5267	1.10881	0.169141
NP_216617.1	Rv2101	helicase HelZ	8	15.52	16.78	19.69	15.55	15.37	17.08	17.33	16	0.923254	0.402848
YP_177858.1	Rv2107	PE family protein	2	3.58	3.63	2.79	26.7	29.85	33.46	3.33333	30.0033	9.001	0.00466125
YP_177859.1	Rv2108	PPE family protein	3	11.67	10.62	10.32	22.11	23.09	22.19	10.87	22.4633	2.06654	3.88567e-05
NP_216625.1	Rv2109c	proteasome (alpha subunit) PrcA	6	16.41	17	14.61	18.22	16.85	16.91	16.0067	17.3267	1.08247	0.207467
NP_216626.1	Rv2110c	proteasome (beta subunit) PrcB	2	12.73	12.59	14.26	16.9	21.61	21.92	13.1933	20.1433	1.52678	0.0396482
NP_216628.1	Rv2112c	hypothetical protein Rv2112c	2	15.73	15.73	17.19	16.81	17.46	17.08	16.2167	17.1167	1.0555	0.197488
NP_216630.1	Rv2114	hypothetical protein Rv2114	7	19.84	19.91	20.81	13.01	13.71	12.71	20.1867	13.1433	0.65109	8.32638e-05
NP_216631.1	Rv2115c	ATPase	24	14.43	14.1	13.73	19.54	19.2	19	14.0867	19.2467	1.3663	5.56657e-05
NP_216637.1	Rv2121c	ATP phosphoribosyltransferase	3	17.34	17.29	21.46	12.82	16.25	14.85	18.6967	14.64	0.783027	0.0823098
NP_216640.1	Rv2124c	5-methyltetrahydrofolate--homocystein methyltransferase	35	10.75	10.86	11.23	22.12	21.74	23.3	10.9467	22.3867	2.04507	0.000730766
NP_216645.1	Rv2129c	short chain dehydrogenase	4	20.15	17.42	19.47	14.12	16.08	12.77	19.0133	14.3233	0.753331	0.021527
NP_216646.1	Rv2130c	cysteinyl-tRNA synthetase	1	15.54	17.5	17.79	16.74	15.4	17.02	16.9433	16.3867	0.967145	0.558801
NP_216649.1	Rv2133c	hypothetical protein Rv2133c	1	13.75	17.11	11.67	20.24	15.83	21.39	14.1767	19.1533	1.35105	0.0988399
NP_216654.1	Rv2138	lipoprotein LppL	3	13.39	15.9	14.96	17.53	17.01	21.22	14.75	18.5867	1.26011	0.0819817
NP_216658.1	Rv2142c	hypothetical protein Rv2142c	1	15.1	15.5	14.73	18.26	17.44	18.97	15.11	18.2233	1.20604	0.00851487
NP_216661.1	Rv2145c	hypothetical protein Rv2145c	6	20.45	22.85	17.27	11.98	12.72	14.73	20.19	13.1433	0.650982	0.0307482
NP_216663.1	Rv2147c	hypothetical protein Rv2147c	7	19.95	19.99	20.74	12.85	13	13.47	20.2267	13.1067	0.647989	4.80081e-05
NP_216666.1	Rv2150c	cell division protein FtsZ	22	16.52	17.28	15.69	17.01	16.43	17.07	16.4967	16.8367	1.02061	0.550944
NP_216667.1	Rv2151c	cell division protein FtsQ	2	20.86	13.09	17.94	16.14	15.89	16.08	17.2967	16.0367	0.927154	0.634145
NP_216668.1	Rv2152c	UDP-N-acetylmuramate--L-alanine ligase	1	19.25	17.28	21.08	14.16	14.81	13.42	19.2033	14.13	0.73581	0.0317749
NP_216673.1	Rv2157c	UDP-N-acetylmuramoylalanyl-D-glutamyl-2,6-diaminopimelate- D-alanyl-D-alanyl ligase MurF	1	16.09	17.17	18.15	15.41	17.59	15.6	17.1367	16.2	0.945341	0.365877
NP_216679.1	Rv2163c	penicillin-binding membrane protein pbpB	1	13.38	15.44	15.86	15.94	19.13	20.25	14.8933	18.44	1.23814	0.092425
NP_216682.1	Rv2166c	cell division protein MraZ	4	13.54	13.52	13	18.51	21.04	20.4	13.3533	19.9833	1.49651	0.00985047
NP_216687.1	Rv2171	lipoprotein lppM	1	15.16	14.85	15.82	17.06	18.9	18.21	15.2767	18.0567	1.18198	0.0189281
NP_216688.1	Rv2172c	hypothetical protein Rv2172c	2	17.56	18.15	17.32	15.24	16.21	15.51	17.6767	15.6533	0.885536	0.00640901
NP_216694.1	Rv2178c	3-deoxy-D-arabino-heptulosonate 7-phosphate synthase AroG	13	18.17	18.63	18.11	15.37	14.21	15.51	18.3033	15.03	0.821162	0.0080318
NP_216698.1	Rv2182c	1-acylglycerol-3-phosphate O-acyltransferase	3	7.29	9.3	7.88	29.11	19.18	27.26	8.15667	25.1833	3.08745	0.0268966
NP_216701.1	Rv2185c	hypothetical protein Rv2185c	39	16.84	16.88	17.76	15.93	15.97	16.61	17.16	16.17	0.942308	0.0617898
NP_216702.1	Rv2186c	hypothetical protein Rv2186c	5	14.27	14.49	14.2	18.74	20.18	18.12	14.32	19.0133	1.32775	0.0150021
NP_216703.1	Rv2187	long-chain-fatty-acid-CoA ligase fadD15 (fatty-acid-CoA synthetase) (fatty-acid-CoA synthase)	26	17.23	16.79	18.63	15.53	15.75	16.07	17.55	15.7833	0.899335	0.0764946
NP_216706.1	Rv2190c	hypothetical protein Rv2190c	3	15.98	16.22	16.97	17.08	17.97	15.77	16.39	16.94	1.03356	0.495318
NP_216710.1	Rv2194	ubiquinol-cytochrome C reductase QcrC(cytochrome C subunit)	12	16.43	15.97	17.86	15.43	17.9	16.4	16.7533	16.5767	0.989455	0.857008
NP_216711.1	Rv2195	Rieske iron-sulfur protein QcrA	23	17.71	16.22	18.3	15.74	15.76	16.27	17.41	15.9233	0.914608	0.129613
NP_216716.1	Rv2200c	transmembrane cytochrome C oxidase subunit II CtaC	22	17.36	17.49	16.75	16.56	15.68	16.16	17.2	16.1333	0.937984	0.0360344
NP_216717.1	Rv2201	asparagine synthetase AsnB	2	17.45	16.78	20.92	13.91	14.81	16.14	18.3833	14.9533	0.813418	0.0982917
NP_216718.1	Rv2202c	carbohydrate kinase CbhK	2	15.76	19.38	13.25	19.41	14.81	17.38	16.13	17.2	1.06634	0.657171
NP_216719.1	Rv2203	hypothetical protein Rv2203	5	15.22	15.35	16.79	17.17	17.73	17.75	15.7867	17.55	1.1117	0.0582565
NP_216720.1	Rv2204c	hypothetical protein Rv2204c	11	12.1	12.12	11.05	21.14	21.46	22.12	11.7567	21.5733	1.83499	3.75578e-05
NP_216722.2	Rv2206	transmembrane protein	6	9.6	9.94	11.4	22.11	22.93	24.02	10.3133	23.02	2.23206	8.37662e-05
NP_216723.1	Rv2207	nicotinate-nucleotide--dimethylbenzimidazole phosphoribosyltransferase	1	16.45	16	16.15	16.73	17.52	17.14	16.2	17.13	1.05741	0.0347851
NP_216726.1	Rv2210c	branched-chain amino acid aminotransferase	3	12.86	19.66	15.65	18.89	16.96	15.98	16.0567	17.2767	1.07598	0.613871
NP_216727.1	Rv2211c	glycine cleavage system aminomethyltransferase T	7	17.84	17.6	17.66	16.19	15.39	15.33	17.7	15.6367	0.883427	0.0131517
NP_216728.1	Rv2212	hypothetical protein Rv2212	1	17.55	17	19.71	14.53	15.97	15.23	18.0867	15.2433	0.842794	0.0557052
NP_216729.1	Rv2213	leucyl aminopeptidase	5	13.62	15.11	14.17	19.43	18.52	19.14	14.3	19.03	1.33077	0.00173059
NP_216731.1	Rv2215	dihydrolipoamide acetyltransferase	80	16.97	15.33	14.09	19.27	15.94	18.39	15.4633	17.8667	1.15542	0.140245
NP_216734.1	Rv2218	lipoyl synthase	2	7.41	7.71	6.54	26.33	24.7	27.31	7.22	26.1133	3.61681	0.000290069
NP_216735.1	Rv2219	transmembrane protein	4	12.18	12.53	13.16	19.61	21.03	21.49	12.6233	20.71	1.64061	0.00110574
YP_177661.1	Rv2219A	hypothetical protein Rv2219A	1	17.16	14.5	18.37	14.95	18.55	16.48	16.6767	16.66	0.999001	0.991926
NP_216736.1	Rv2220	glutamine synthetase GLNA1 (glutamine synthase) (GS-I)	51	19.93	21.06	20.58	12.37	13.66	12.4	20.5233	12.81	0.624168	0.000202143
NP_216737.1	Rv2221c	glutamate-ammonia-ligase adenylyltransferase GLNE (glutamine-synthetase adenylyltransferase)	2	12.04	9.7	12.7	22.42	20.61	22.52	11.48	21.85	1.90331	0.00126763
NP_216738.1	Rv2222c	glutamine synthetase	7	17.26	18.54	18.91	14.89	14.6	15.79	18.2367	15.0933	0.827637	0.0089846
NP_216740.1	Rv2224c	exported protease	22	13.64	14.45	14.21	19.38	18.46	19.88	14.1	19.24	1.36454	0.00129932
NP_216742.1	Rv2226	hypothetical protein Rv2226	8	18.01	17.42	18.74	14.8	16.08	14.95	18.0567	15.2767	0.84604	0.00754542
NP_216744.1	Rv2228c	bifunctional RNase H/acid phosphatase	2	17.08	17.9	15.37	16.88	16.1	16.66	16.7833	16.5467	0.985899	0.786202
NP_216745.1	Rv2229c	hypothetical protein Rv2229c	2	13.8	18.62	11.72	21.55	14.95	19.36	14.7133	18.62	1.26552	0.238138
NP_216751.1	Rv2235	transmembrane protein	3	7.71	25.59	20.19	10.78	18.07	17.66	17.83	15.5033	0.869508	0.717196
NP_216753.1	Rv2237	hypothetical protein Rv2237	1	16.63	19.12	20.44	13.65	14.83	15.32	18.73	14.6	0.779498	0.0488613
NP_216754.1	Rv2238c	peroxiredoxin AhpE	1	17.81	18.37	18.66	14.91	15.91	14.35	18.28	15.0567	0.823669	0.00769441
NP_216756.1	Rv2240c	hypothetical protein Rv2240c	2	22.18	23.56	23.98	9.54	10.83	9.91	23.24	10.0933	0.434309	8.48575e-05
NP_216757.1	Rv2241	pyruvate dehydrogenase subunit E1	31	14.55	15.53	16.51	16.76	17.88	18.77	15.53	17.8033	1.14638	0.0487567
NP_216759.1	Rv2243	acyl-carrier-protein S-malonyltransferase	10	22.41	21.96	25	9.6	10.6	10.43	23.1233	10.21	0.441545	0.0027029
NP_216760.1	Rv2244	acyl carrier protein	30	16.14	15.92	18.84	15.36	17.1	16.64	16.9667	16.3667	0.964637	0.613789
NP_216761.1	Rv2245	3-oxoacyl-(acyl carrier protein) synthase II	7	17.64	18.96	19.75	13.74	14.41	15.5	18.7833	14.55	0.774623	0.00672481
NP_216762.1	Rv2246	3-oxoacyl-(acyl carrier protein) synthase II	9	19.19	19.2	20.34	12.69	14.99	13.6	19.5767	13.76	0.702878	0.00392721
NP_216763.1	Rv2247	acetyl/propionyl-CoA carboxylase beta subunit AccD6	15	11.68	11.66	11.78	21.53	21.72	21.62	11.7067	21.6233	1.8471	8.21912e-08
YP_177662.1	Rv2250A	flavoprotein	5	10.16	8.92	10.09	22.91	24.04	23.88	9.72333	23.61	2.42818	1.5135e-05
NP_216767.1	Rv2251	flavoprotein	2	9.6	8.87	9.65	21.42	25.28	25.18	9.37333	23.96	2.55619	0.00591035
NP_216768.1	Rv2252	diacylglycerol kinase	5	10.02	9.94	9.89	23.64	22.8	23.71	9.95	23.3833	2.35008	0.000389484
NP_216774.1	Rv2258c	transcriptional regulator	3	18.22	20.28	18.53	13.56	15.16	14.25	19.01	14.3233	0.753463	0.00544695
NP_216775.1	Rv2259	zinc-dependent alcohol dehydrogenase AdhE2	15	11.73	12.54	13.55	19.83	21.87	20.48	12.6067	20.7267	1.6441	0.000577965
NP_216779.1	Rv2263	short chain dehydrogenase	6	15.26	15.02	15.79	17.85	17.98	18.1	15.3567	17.9767	1.17061	0.00416489
NP_216792.1	Rv2276	cytochrome P450 121 CYP121	4	9.84	12.17	10.92	22.2	20.56	24.31	10.9767	22.3567	2.03674	0.00192956
NP_216796.1	Rv2280	dehydrogenase	22	13.17	12.69	12.06	22.19	19.14	20.74	12.64	20.69	1.63687	0.00624421
NP_216805.1	Rv2289	CDP-diacylglycerol pyrophosphatase	5	16.51	18.54	18.92	14.67	15.95	15.42	17.99	15.3467	0.853067	0.0523628
NP_216806.1	Rv2290	lipoprotein lppO	1	16.31	16.58	15.91	18.68	15.22	17.3	16.2667	17.0667	1.04918	0.511567
NP_216810.1	Rv2294	aminotransferase	6	17.42	17.73	19.54	14.38	15.37	15.56	18.23	15.1033	0.828488	0.0237356
NP_216812.1	Rv2296	haloalkane dehalogenase	6	16.96	15.64	16.03	17.49	17.26	16.62	16.21	17.1233	1.05634	0.134575
NP_216813.1	Rv2297	hypothetical protein Rv2297	2	13.53	13.76	17.85	15.87	18.91	20.08	15.0467	18.2867	1.21533	0.161203
NP_216814.1	Rv2298	hypothetical protein Rv2298	4	14.46	14.51	14.39	18.77	19.57	18.31	14.4533	18.8833	1.3065	0.00645694
NP_216815.1	Rv2299c	heat shock protein 90	79	17.56	17.3	18.62	15.55	15.22	15.75	17.8267	15.5067	0.869858	0.0185403
NP_216817.2	Rv2301	cutinase CUT2	1	18.54	19.64	19.32	14.27	13.84	14.39	19.1667	14.1667	0.73913	0.000887119
NP_216818.1	Rv2302	hypothetical protein Rv2302	2	13.39	16.03	13.33	20.93	17.25	19.09	14.25	19.09	1.33965	0.0263296
NP_216830.1	Rv2314c	hypothetical protein Rv2314c	3	17.71	17.89	17.29	15.96	15.19	15.96	17.63	15.7033	0.890717	0.00509682
NP_216840.1	Rv2324	AsnC family transcriptional regulator	2	7.43	6.36	6.51	24.57	27.02	28.11	6.76667	26.5667	3.92611	0.0012688
NP_216842.1	Rv2326c	transmembrane ATP-binding protein ABC transorter	3	10.09	10.71	10.61	21.9	22.24	24.45	10.47	22.8633	2.1837	0.00273772
YP_177867.1	Rv2328	PE family protein	1	18.95	17.32	18.63	15.65	14.81	14.63	18.3	15.03	0.821311	0.0084086
NP_216846.1	Rv2330c	lipoprotein LppP	1	11.28	11.29	11.8	22.53	20.45	22.66	11.4567	21.88	1.90981	0.00315293
NP_216848.2	Rv2332	malate dehydrogenase	1	16.14	14.48	19.42	15.33	17.84	16.79	16.68	16.6533	0.998401	0.987945
YP_177868.1	Rv2334	cysteine synthase A CysK1	7	18.94	17.03	17.89	15.19	15.95	14.99	17.9533	15.3767	0.85648	0.0252143
NP_216854.1	Rv2338c	hypothetical protein Rv2338c	3	17.48	17.15	23.09	12.08	15.66	14.54	19.24	14.0933	0.732502	0.0981927
NP_216855.1	Rv2339	transmembrane transport protein MmpL9	1	13.38	13.38	14.41	19.98	18.22	20.63	13.7233	19.61	1.42895	0.00600435
NP_216858.1	Rv2342	hypothetical protein Rv2342	2	13.44	11.85	12.54	20.91	21.26	19.99	12.61	20.72	1.64314	0.000211178
NP_216859.1	Rv2343c	DNA primase	5	14.4	14.04	18.21	16.63	19.66	17.06	15.55	17.7833	1.14362	0.251091
NP_216860.1	Rv2344c	deoxyguanosinetriphosphate triphosphohydrolase-like protein	1	16.51	16.06	16.06	17.62	16.59	17.15	16.21	17.12	1.05614	0.0731966
NP_216866.1	Rv2350c	membrane-associated phospholipase C	2	24.74	29.15	35.2	3.26	3.22	4.43	29.6967	3.63667	0.12246	0.0121716
NP_216873.1	Rv2357c	glycyl-tRNA synthetase	17	18.41	18.43	19.28	13.96	14.96	14.96	18.7067	14.6267	0.781896	0.0008325
NP_216876.1	Rv2360c	hypothetical protein Rv2360c	4	15.82	17.97	17.23	16.67	15.63	16.69	17.0067	16.33	0.960212	0.41483
NP_216879.1	Rv2363	amidase	3	19.4	17.45	19.39	13.71	15.13	14.93	18.7467	14.59	0.778272	0.00858061
YP_177873.1	Rv2364c	GTP-binding protein Era	2	16.57	16.51	15.64	17.74	15.71	17.83	16.24	17.0933	1.05255	0.347647
YP_177874.1	Rv2368c	phosphate starvation-inducible protein PsiH	3	14.93	14.64	14.49	19.07	19.13	17.75	14.6867	18.65	1.26986	0.00850357
NP_216889.1	Rv2373c	chaperone protein DnaJ2	12	11.7	12.89	13.27	20.38	21.31	20.44	12.62	20.71	1.64105	0.000366766
NP_216892.1	Rv2376c	low molecular weight antigen CFP2 (low molecular weight protein antigen 2) (CFP-2)	1	15.43	16.52	15.32	16.24	18.27	18.23	15.7567	17.58	1.11572	0.0942482
NP_216896.1	Rv2380c	peptide synthetase MBTE (peptide synthase)	2	11.51	11.2	13.69	20	21.05	22.55	12.1333	21.2	1.74725	0.00110818
YP_177877.1	Rv2386c	salicylate synthase MbtI	1	10.33	10.36	10.24	21.97	22.8	24.3	10.31	23.0233	2.23311	0.00279971
NP_216903.1	Rv2387	hypothetical protein Rv2387	1	19.65	20.52	20.49	13.3	13.63	12.4	20.22	13.11	0.648368	0.000157889
NP_216907.1	Rv2391	ferredoxin-dependent nitrite reductase NIRA	22	21.35	21.21	21.05	11.96	11.94	12.49	21.2033	12.13	0.57208	3.34817e-05
NP_216908.1	Rv2392	phosphoadenosine phosphosulfate reductase	4	18.31	12.42	16.74	17.44	17.3	17.79	15.8233	17.51	1.10659	0.439383
NP_216910.1	Rv2394	gamma-glutamyltranspeptidase precursor GgtB	3	23.24	14.36	17.51	17.48	12.63	14.78	18.37	14.9633	0.814553	0.3305
YP_177879.1	Rv2397c	sulfate-transport ATP-binding protein ABC transporter CysA1	1	12.22	16.45	14.76	18.72	17.88	19.97	14.4767	18.8567	1.30256	0.0514035
NP_216916.1	Rv2400c	sulfate-binding lipoprotein	8	17.22	16.48	17.14	16.1	16.79	16.27	16.9467	16.3867	0.966955	0.14929
NP_216918.1	Rv2402	hypothetical protein Rv2402	8	12.57	13.81	15.65	18.38	19.52	20.07	14.01	19.3233	1.37925	0.0125025
NP_216920.1	Rv2404c	GTP-binding protein LepA	11	14.6	15.09	15.64	17.72	18.04	18.9	15.11	18.22	1.20582	0.00279291
NP_216922.1	Rv2406c	hypothetical protein Rv2406c	4	16.33	15.23	14.65	17.43	18.73	17.64	15.4033	17.9333	1.16425	0.0177521
NP_216925.1	Rv2409c	hypothetical protein Rv2409c	2	15.97	14.77	15.83	19.86	15.14	18.43	15.5233	17.81	1.14731	0.239205
NP_216927.1	Rv2411c	hypothetical protein Rv2411c	3	13.21	13.67	14.01	18.43	19.5	21.19	13.63	19.7067	1.44583	0.0119307
NP_216928.1	Rv2412	30S ribosomal protein S20	1	13.41	15.08	13.15	18.77	20.4	19.18	13.88	19.45	1.4013	0.00236353
NP_216929.1	Rv2413c	hypothetical protein Rv2413c	2	15.46	15.26	15.29	18.35	18.28	17.36	15.3367	17.9967	1.17344	0.0117098
NP_216932.2	Rv2416c	hypothetical protein Rv2416c	1	13.17	14.11	16.11	18.1	18.61	19.89	14.4633	18.8667	1.30445	0.0184283
NP_216933.1	Rv2417c	hypothetical protein Rv2417c	1	18.1	14.44	13.74	20.37	16.03	17.33	15.4267	17.91	1.16098	0.25416
NP_216934.1	Rv2418c	hypothetical protein Rv2418c	1	17.06	14.57	17.69	15.27	19.31	16.1	16.44	16.8933	1.02758	0.786294
NP_216935.1	Rv2419c	phosphoglycerate mutase (phosphoglyceromutase)	1	13.24	13.94	14.54	19.1	18.65	20.52	13.9067	19.4233	1.39669	0.00218196
NP_216937.1	Rv2421c	nicotinic acid mononucleotide adenylyltransferase	1	10.66	11.99	11.52	20.74	22.6	22.48	11.39	21.94	1.92625	0.000320754
NP_216941.1	Rv2425c	hypothetical protein Rv2425c	2	11.41	12.5	11.34	22.19	20.23	22.32	11.75	21.58	1.8366	0.000853216
NP_216942.1	Rv2426c	hypothetical protein Rv2426c	1	19.32	10.28	14	18.31	19.23	18.86	14.5333	18.8	1.29358	0.244544
NP_216943.1	Rv2427c	gamma-glutamyl phosphate reductase	7	17.91	18.81	15.55	16.18	15.43	16.13	17.4233	15.9133	0.913335	0.25737
NP_216944.1	Rv2428	alkyl hydroperoxide reductase subunit C	14	18.99	20.3	17.54	15.69	12.74	14.73	18.9433	14.3867	0.759458	0.0183228
NP_216945.1	Rv2429	alkyl hydroperoxide reductase subunit D	4	22.83	22.9	24.28	9.8	10.3	9.89	23.3367	9.99667	0.428367	0.0004682
YP_177882.1	Rv2431c	PE family protein	2	6.33	7.32	6.87	25.39	28.21	25.88	6.84	26.4933	3.87329	0.000790844
NP_216954.2	Rv2438c	NAD synthetase	3	16.93	17.44	18.17	16.31	15.51	15.65	17.5133	15.8233	0.903502	0.0225334
NP_216956.1	Rv2440c	GTPase ObgE	3	15.46	15.82	16.05	16.5	18.82	17.35	15.7767	17.5567	1.11282	0.111739
NP_216957.1	Rv2441c	50S ribosomal protein L27	20	17.38	18.94	17.46	16.86	13.53	15.83	17.9267	15.4067	0.859427	0.107583
NP_216958.1	Rv2442c	50S ribosomal protein L21	33	16.49	16.73	16.15	16.11	17.51	17.01	16.4567	16.8767	1.02552	0.420964
NP_216960.1	Rv2444c	ribonuclease E	20	18.23	17.81	18.26	15.67	15.35	14.68	18.1	15.2333	0.841621	0.00336992
NP_216963.1	Rv2447c	folylpolyglutamate synthase protein FolC	3	14.22	16.63	11.73	22.43	14.96	20.03	14.1933	19.14	1.34852	0.143959
NP_216964.1	Rv2448c	valyl-tRNA synthetase	19	16.8	16.13	17.74	15.53	17.02	16.77	16.89	16.44	0.973357	0.530397
NP_216965.1	Rv2449c	hypothetical protein Rv2449c	3	11.59	13.02	13.23	19.09	19.86	23.2	12.6133	20.7167	1.64244	0.0133871
NP_216970.1	Rv2454c	2-oxoglutarate ferredoxin oxidoreductase subunit beta	13	18.65	15.7	15.98	17.23	16.1	16.34	16.7767	16.5567	0.986887	0.842577
NP_216971.1	Rv2455c	oxidoreductase alpha subunit	10	12.65	13	15.66	17.74	20.23	20.73	13.77	19.5667	1.42096	0.0119732
NP_216973.1	Rv2457c	ATP-dependent protease ATP-binding subunit ClpX	36	13.86	14.57	14.57	18.84	18.46	19.69	14.3333	18.9967	1.32535	0.000915381
NP_216976.1	Rv2460c	ATP-dependent ClpP2 protease proteolytic subunit	9	26.54	33.69	32.24	2.18	2.59	2.76	30.8233	2.51	0.0814318	0.00564876
YP_177883.1	Rv2461c	ATP-dependent ClpP1 protease proteolytic subunit	2	27.58	33.25	33.66	1.35	1.92	2.24	31.4967	1.83667	0.058313	0.00382867
NP_216978.1	Rv2462c	trigger factor	26	20.71	19.41	18.91	13.94	14.02	13.01	19.6767	13.6567	0.694054	0.00162049
NP_216982.1	Rv2466c	hypothetical protein Rv2466c	9	10.34	8.95	9.73	23.5	24.47	23.01	9.67333	23.66	2.4459	1.91825e-05
YP_177885.1	Rv2467	aminopeptidase N	15	12.86	13.32	14.41	21.02	18.51	19.88	13.53	19.8033	1.46366	0.00349135
NP_216986.1	Rv2470	globin GlbO	1	17.8	15.5	16.42	15.89	17.7	16.69	16.5733	16.76	1.01126	0.83734
NP_216989.1	Rv2473	alanine and proline rich membrane protein	1	20.34	12.34	16.05	16.56	17.58	17.12	16.2433	17.0867	1.05192	0.751104
NP_216991.1	Rv2475c	hypothetical protein Rv2475c	1	16.92	15.94	18.11	15.46	17.15	16.43	16.99	16.3467	0.962135	0.466712
NP_216992.1	Rv2476c	NAD-dependent glutamate dehydrogenase	21	17.72	15.71	16.97	17.07	16.7	15.83	16.8	16.5333	0.984127	0.723119
NP_216993.1	Rv2477c	putative ABC transporter ATP-binding protein	41	15.65	14.99	15.97	17.84	17.61	17.94	15.5367	17.7967	1.14546	0.00974979
NP_216998.1	Rv2482c	glycerol-3-phosphate acyltransferase	4	12.73	12.48	14.93	19.51	19.58	20.76	13.38	19.95	1.49103	0.00487471
NP_216999.1	Rv2483c	bifunctionnal putative L-3-phosphoserine phosphatase/1-acyl-SN-glycerol-3-phosphate acyltransferase	9	10.44	10.86	12.09	22.23	20.89	23.49	11.13	22.2033	1.99491	0.000556342
NP_217002.1	Rv2486	enoyl-CoA hydratase	5	16.72	15.32	16.47	16.97	17.95	16.58	16.17	17.1667	1.06164	0.168461
NP_217012.1	Rv2496c	pyruvate dehydrogenase E1 component beta subunit PdhB	5	7.68	8.66	8.05	25.7	24.8	25.12	8.13	25.2067	3.10045	1.72103e-06
NP_217014.1	Rv2498c	citrate (Pro-3S)-lyase beta subunit	3	12.57	16.13	16.53	16.79	18.46	19.51	15.0767	18.2533	1.2107	0.112358
NP_217016.1	Rv2500c	acyl-CoA dehydrogenase	3	12.29	15.83	17.04	16.72	17.76	20.35	15.0533	18.2767	1.21413	0.15096
NP_217018.1	Rv2502c	acetyl-/propionyl-CoA carboxylase subunit beta	4	16.32	16.06	18.98	15.68	16.74	16.22	17.12	16.2133	0.94704	0.43822
NP_217019.1	Rv2503c	succinyl-CoA:3-ketoacid-coenzyme A transferase subunit beta ScoB	7	18.56	19.09	17.67	15.98	14.5	14.21	18.44	14.8967	0.807845	0.00813561
NP_217025.1	Rv2509	short-chain type dehydrogenase/reductase	8	15.73	16.29	17.91	16.29	16.67	17.11	16.6433	16.69	1.0028	0.95145
NP_217026.1	Rv2510c	hypothetical protein Rv2510c	3	15.63	17.34	17.96	15.49	16.67	16.91	16.9767	16.3567	0.963479	0.500598
NP_217032.2	Rv2516c	hypothetical protein Rv2516c	1	13.8	14.17	15.96	17.43	19.29	19.36	14.6433	18.6933	1.27658	0.0116954
NP_217034.1	Rv2518c	lipoprotein LppS	5	18.09	16.84	20.48	13.6	16.3	14.68	18.47	14.86	0.804548	0.0578951
NP_217036.1	Rv2520c	hypothetical protein Rv2520c	3	18.08	18.43	17.72	16.62	14.26	14.89	18.0767	15.2567	0.843998	0.0479429
NP_217037.1	Rv2521	bacterioferritin comigratory protein BCP	12	16.23	15.97	17.75	15.75	17.67	16.63	16.65	16.6833	1.002	0.96816
NP_217040.1	Rv2524c	fatty acid synthase	36	18.65	16.48	20.02	14.42	15.3	15.14	18.3833	14.9533	0.813418	0.0711927
NP_217041.1	Rv2525c	hypothetical protein Rv2525c	4	29.73	20.59	23.67	9.6	7.99	8.42	24.6633	8.67	0.351534	0.0240734
NP_217043.1	Rv2527	hypothetical protein Rv2527	2	13.31	12.1	11.71	20.3	21.73	20.85	12.3733	20.96	1.69397	0.00019851
NP_217044.1	Rv2528c	restriction system protein mrr	8	14.67	16.05	17.87	15.56	19.94	15.91	16.1967	17.1367	1.05804	0.610665
NP_217045.1	Rv2529	hypothetical protein Rv2529	4	17.89	17.55	19.62	14.89	15.54	14.51	18.3533	14.98	0.816201	0.0198567
YP_177889.1	Rv2531c	amino acid decarboxylase	2	13.25	14.7	17.86	16.34	18.32	19.54	15.27	18.0667	1.18315	0.174525
NP_217049.1	Rv2533c	transcription antitermination protein NusB	1	16.58	16.94	18.3	16.33	15.71	16.14	17.2733	16.06	0.929757	0.135126
NP_217050.1	Rv2534c	elongation factor P	8	19.48	16.8	18.01	15.5	15.95	14.26	18.0967	15.2367	0.84196	0.0446866
NP_217051.1	Rv2535c	cytoplasmic peptidase PepQ	7	16.05	17.45	15.42	18.32	15.61	17.15	16.3067	17.0267	1.04415	0.509038
NP_217054.1	Rv2538c	3-dehydroquinate synthase	6	16.8	15.24	17.19	16.16	18.24	16.37	16.41	16.9233	1.03128	0.59528
NP_217055.1	Rv2539c	shikimate kinase	5	11.79	11.3	11.92	19.66	22.94	22.4	11.67	21.6667	1.85661	0.00840815
NP_217056.1	Rv2540c	chorismate synthase	2	13.68	13.94	14.52	18.82	19.86	19.19	14.0467	19.29	1.37328	0.000231175
NP_217060.1	Rv2544	lipoprotein LppB	2	18.81	20.19	19.19	13.77	13.97	14.07	19.3967	13.9367	0.718508	0.00416486
NP_217069.1	Rv2553c	hypothetical protein Rv2553c	5	17.18	18.61	14.99	17.54	14.74	16.94	16.9267	16.4067	0.969279	0.72124
NP_217071.1	Rv2555c	alanyl-tRNA synthetase	15	15.41	14.55	15.03	17.67	18.56	18.79	14.9967	18.34	1.22294	0.00198913
NP_217075.1	Rv2559c	recombination factor protein RarA	2	9.7	11.49	11.21	20.96	21.69	24.95	10.8	22.5333	2.08642	0.00419901
NP_217076.1	Rv2560	hypothetical protein Rv2560	2	19.31	20.37	22.32	12.42	12.37	13.2	20.6667	12.6633	0.612742	0.0075462
NP_217080.1	Rv2564	glutamine-transport ATP-binding protein ABC transporter GlnQ	3	17.77	17.87	18.82	14.99	15.61	14.94	18.1533	15.18	0.83621	0.00313147
NP_217081.1	Rv2565	hypothetical protein Rv2565	1	16.15	18.05	20.01	14.4	15.9	15.5	18.07	15.2667	0.844863	0.114004
NP_217082.1	Rv2566	hypothetical protein Rv2566	5	17.42	19.12	19.11	14.36	14.64	15.34	18.55	14.78	0.796765	0.00963894
NP_217083.1	Rv2567	hypothetical protein Rv2567	1	17.87	18.36	20.29	14.97	13.5	15	18.84	14.49	0.769108	0.0113385
NP_217084.1	Rv2568c	hypothetical protein Rv2568c	4	18.13	20.37	18.58	13.98	14.76	14.16	19.0267	14.3	0.751577	0.0129328
NP_217086.1	Rv2570	hypothetical protein Rv2570	2	11.96	13.34	11.48	21.01	20.45	21.76	12.26	21.0733	1.71887	0.000411369
NP_217088.1	Rv2572c	aspartyl-tRNA synthetase	5	14.79	15.98	19.13	14.95	16.61	18.55	16.6333	16.7033	1.00421	0.968491
NP_217091.1	Rv2575	hypothetical protein Rv2575	1	16.34	16.33	17.62	15.98	16.51	17.21	16.7633	16.5667	0.988268	0.742452
YP_177890.1	Rv2579	haloalkane dehalogenase	8	19.86	20.15	19.91	12.74	14.61	12.74	19.9733	13.3633	0.669059	0.00778383
NP_217096.1	Rv2580c	histidyl-tRNA synthetase	2	17.02	17.25	16.81	16.7	15.42	16.8	17.0267	16.3067	0.957713	0.242253
NP_217097.1	Rv2581c	glyoxalase II	4	19.36	16.55	19.18	14.53	15.33	15.06	18.3633	14.9733	0.815393	0.0568917
NP_217098.1	Rv2582	peptidyl-prolyl cis-trans isomerase B	14	15.17	15.38	17.4	18.02	16.71	17.32	15.9833	17.35	1.08551	0.186802
NP_217099.1	Rv2583c	GTP pyrophosphokinase	7	11.79	12.09	12.93	18.4	22.93	21.86	12.27	21.0633	1.71665	0.0184366
NP_217101.1	Rv2585c	lipoprotein	1	13.31	16.6	16	17.07	16.37	20.65	15.3033	18.03	1.17817	0.182262
NP_217102.1	Rv2586c	preprotein translocase subunit SecF	2	13.82	13.55	15.79	17.1	19.85	19.88	14.3867	18.9433	1.31673	0.0194733
NP_217103.1	Rv2587c	preprotein translocase subunit SecD	6	14.78	14.86	16.64	17.51	19.51	16.71	15.4267	17.91	1.16098	0.0795667
NP_217105.1	Rv2589	4-aminobutyrate aminotransferase	5	14.46	15.9	15.19	17.68	18.48	18.29	15.1833	18.15	1.19539	0.00700157
NP_217106.1	Rv2590	fatty-acid-CoA ligase	8	21.73	20.9	25.98	9.51	11.12	10.76	22.87	10.4633	0.457513	0.0103104
NP_217108.1	Rv2592c	Holliday junction DNA helicase RuvB	2	19.61	24.94	21.27	9.67	12.47	12.04	21.94	11.3933	0.519295	0.00888253
NP_217109.1	Rv2593c	Holliday junction DNA helicase RuvA	1	22.62	24.52	18.56	11.64	9.55	13.11	21.9	11.4333	0.52207	0.0118772
NP_217110.1	Rv2594c	Holliday junction resolvase	3	13.79	11	12.73	19.96	22.19	20.33	12.5067	20.8267	1.66525	0.00162015
NP_217115.1	Rv2599	hypothetical protein Rv2599	1	19.17	18.55	18.09	14.21	16.21	13.77	18.6033	14.73	0.791794	0.0227057
YP_177673.1	Rv2601A	hypothetical protein Rv2601A	1	7.74	7.08	5.19	23.02	28.72	28.26	6.67	26.6667	3.998	0.00331545
NP_217119.1	Rv2603c	hypothetical protein Rv2603c	11	16.62	16.73	18.26	15.32	17.11	15.97	17.2033	16.1333	0.937803	0.223878
NP_217121.1	Rv2605c	acyl-CoA thioesterase II	1	19.01	17.69	17.63	15.53	14.81	15.34	18.11	15.2267	0.840788	0.0116459
NP_217122.1	Rv2606c	pyridoxal biosynthesis lyase PdxS	27	14.5	15.44	15.11	17.36	18.5	19.09	15.0167	18.3167	1.21976	0.00987549
NP_217123.1	Rv2607	pyridoxamine 5'-phosphate oxidase	7	19.68	15.47	17.07	16.34	16.37	15.07	17.4067	15.9267	0.914975	0.352737
NP_217126.1	Rv2610c	alpha-mannosyltransferase PIMA	4	11.16	10.62	12	22.02	20.99	23.21	11.26	22.0733	1.96033	0.000399497
NP_217129.1	Rv2613c	hypothetical protein Rv2613c	2	15.56	16.54	16.3	16.11	18.15	17.34	16.1333	17.2	1.06612	0.207755
NP_217130.1	Rv2614c	threonyl-tRNA synthetase	15	15.75	16.39	14.99	18.14	16.95	17.77	15.71	17.62	1.12158	0.0242923
NP_217135.1	Rv2619c	hypothetical protein Rv2619c	2	12.98	15.36	16.65	16.58	18.42	20.01	14.9967	18.3367	1.22272	0.0848048
NP_217139.1	Rv2623	hypothetical protein Rv2623	2	12.76	16.47	13.8	18.34	19.46	19.17	14.3433	18.99	1.32396	0.0424415
NP_217140.1	Rv2624c	hypothetical protein Rv2624c	2	15.8	16.87	13.41	18.74	18.38	16.8	15.36	17.9733	1.17014	0.108281
NP_217143.1	Rv2627c	hypothetical protein Rv2627c	1	9.87	10.56	13.27	20.88	21.4	24.01	11.2333	22.0967	1.96706	0.00159603
NP_217145.1	Rv2629	hypothetical protein Rv2629	2	6.92	7.15	8.51	23.52	24.62	29.28	7.52667	25.8067	3.4287	0.00597039
NP_217148.1	Rv2632c	hypothetical protein Rv2632c	1	16.23	18.89	16.52	15.17	15.93	17.24	17.2133	16.1133	0.936096	0.354236
NP_217149.1	Rv2633c	hypothetical protein Rv2633c	2	8.91	9.43	8.69	24.18	25.42	23.37	9.01	24.3233	2.69959	0.000465075
NP_217157.1	Rv2641	cadmium inducible protein CADI	1	11.57	11.47	13.53	19.76	20.47	23.19	12.19	21.14	1.73421	0.00354925
NP_217166.1	Rv2650c	phiRv2 prophage protein	2	11.51	11.45	11.17	22.86	21.55	21.45	11.3767	21.9533	1.92968	0.00115448
NP_217168.1	Rv2652c	phiRv2 prophage protein	1	4.2	3.65	3.88	28.33	28.07	31.86	3.91	29.42	7.5243	0.00198017
NP_217174.1	Rv2658c	prophage protein	2	15.07	17.74	15.77	18.06	15.56	17.81	16.1933	17.1433	1.05867	0.44683
NP_217175.1	Rv2659c	phiRv2 prophage integrase	2	13.78	12.3	13.63	19.35	21.59	19.34	13.2367	20.0933	1.51801	0.00292474
NP_217188.1	Rv2672	secreted protease	1	13.04	13.02	13.17	19.98	20.83	19.96	13.0767	20.2567	1.54907	0.00124329
NP_217190.1	Rv2674	hypothetical protein Rv2674	1	12.87	14.74	14.78	18.75	18.91	19.96	14.13	19.2067	1.35928	0.00463577
NP_217191.1	Rv2675c	hypothetical protein Rv2675c	1	15.86	13.74	15.72	15.99	21.79	16.89	15.1067	18.2233	1.20631	0.219409
YP_177675.1	Rv2677c	protoporphyrinogen oxidase	1	13.88	13.68	13.92	18.3	20.17	20.06	13.8267	19.51	1.41104	0.0103074
YP_177898.1	Rv2682c	1-deoxy-D-xylulose-5-phosphate synthase	6	11.5	11.5	12.1	20.91	22.02	21.97	11.7	21.6333	1.849	0.000121318
NP_217199.1	Rv2683	hypothetical protein Rv2683	4	10.56	12.75	10.2	22.59	20.33	23.57	11.17	22.1633	1.98418	0.00106103
NP_217204.1	Rv2688c	antibiotic ABC transporter ATP-binding protein	3	6.85	5.59	5.55	25.52	28.46	28.02	5.99667	27.3333	4.55809	0.00033525
NP_217205.1	Rv2689c	hypothetical protein Rv2689c	2	15.65	17.15	18.99	15.43	15.92	16.86	17.2633	16.07	0.930875	0.346788
NP_217206.1	Rv2690c	hypothetical protein Rv2690c	3	13.43	12.41	12.07	19.88	21.73	20.48	12.6367	20.6967	1.63783	0.000443156
YP_177900.1	Rv2691	TRK system potassium uptake protein CEOB	2	18.14	17.39	17.44	15.4	17.06	14.58	17.6567	15.68	0.88805	0.10162
YP_177901.1	Rv2692	TRK system potassium uptake protein CEOC	1	16.06	15.41	16.51	17.61	17.24	17.17	15.9933	17.34	1.0842	0.0364079
NP_217210.1	Rv2694c	hypothetical protein Rv2694c	2	11.84	11.08	10.62	21.61	21.16	23.68	11.18	22.15	1.98122	0.00141071
NP_217212.1	Rv2696c	hypothetical protein Rv2696c	3	16.22	18.13	16.2	17.72	14.88	16.86	16.85	16.4867	0.978437	0.749443
NP_217218.1	Rv2702	polyphosphate glucokinase PPGK (polyphosphate-glucose phosphotransferase)	2	10.04	9.59	10.78	24	23.12	22.46	10.1367	23.1933	2.28806	3.34591e-05
NP_217219.1	Rv2703	RNA polymerase sigma factor	31	17.77	18.13	17.28	16.43	15.06	15.33	17.7267	15.6067	0.880406	0.0190403
NP_217224.1	Rv2708c	hypothetical protein Rv2708c	4	13.4	11.43	11.04	20.79	23.04	20.3	11.9567	21.3767	1.78784	0.0011784
NP_217226.1	Rv2710	RNA polymerase sigma factor SigB	12	3.17	3.05	2.22	33.75	27.88	29.93	2.81333	30.52	10.8483	0.00306465
NP_217227.1	Rv2711	IRON-dependent repressor and activator IDER	13	16.61	15.24	16.47	16.43	17.06	18.19	16.1067	17.2267	1.06954	0.173956
NP_217229.1	Rv2713	soluble pyridine nucleotide transhydrogenase	4	17.26	17.01	19.49	14.74	15.88	15.62	17.92	15.4133	0.860119	0.0690738
NP_217230.1	Rv2714	hypothetical protein Rv2714	3	10.44	11.59	11.07	22.32	21.3	23.28	11.0333	22.3	2.02115	0.000292392
NP_217233.1	Rv2717c	hypothetical protein Rv2717c	3	17.19	14.35	15.83	17.42	17.95	17.25	15.79	17.54	1.11083	0.159694
NP_217234.1	Rv2718c	transcriptional regulator NrdR	3	13.05	13.38	13	20.12	19.52	20.93	13.1433	20.19	1.53614	0.00177815
NP_217236.1	Rv2720	LexA repressor	4	16.84	14.46	14.31	17.68	19	17.72	15.2033	18.1333	1.19272	0.0499822
NP_217237.1	Rv2721c	hypothetical protein Rv2721c	31	21.84	23.99	23.85	10.05	10.15	10.12	23.2267	10.1067	0.435132	0.0027493
NP_217240.1	Rv2724c	acyl-CoA dehydrogenase FADE20	8	16.44	15.89	15.72	16.87	18.33	16.74	16.0167	17.3133	1.08096	0.110757
NP_217241.1	Rv2725c	GTP-binding protein HflX	3	10.81	11.62	10.67	22.45	21.07	23.38	11.0333	22.3	2.02115	0.00095328
NP_217243.1	Rv2727c	tRNA delta(2)-isopentenylpyrophosphate transferase	1	15.6	14.89	16.01	17.59	18.3	17.6	15.5	17.83	1.15032	0.00595336
NP_217247.1	Rv2731	hypothetical protein Rv2731	15	19.49	19.66	20.14	13.06	14.02	13.64	19.7633	13.5733	0.686794	0.000118897
NP_217249.1	Rv2733c	hypothetical protein Rv2733c	5	8.76	8.47	8.77	23.89	23.82	26.28	8.66667	24.6633	2.84577	0.00225151
NP_217251.1	Rv2735c	hypothetical protein Rv2735c	1	18.32	17.52	22.37	14.01	13.34	14.43	19.4033	13.9267	0.717746	0.061927
NP_217253.1	Rv2737c	DNA recombination protein RecA	18	19.23	21.42	20.86	12.53	12.73	13.23	20.5033	12.83	0.625752	0.00403416
NP_217256.1	Rv2740	hypothetical protein Rv2740	2	16.97	15.41	17.94	18.24	14.68	16.77	16.7733	16.5633	0.98748	0.877375
YP_177903.1	Rv2744c	hypothetical protein Rv2744c	22	13.85	15.95	12.91	16.2	19.86	21.24	14.2367	19.1	1.34161	0.062838
NP_217263.1	Rv2747	N-acetylglutamate synthase	1	20.69	20.32	23.04	11.52	11.31	13.12	21.35	11.9833	0.56128	0.00146273
NP_217264.1	Rv2748c	cell division transmembrane protein FtsK	12	13.58	13.2	14.55	19.37	19.41	19.89	13.7767	19.5567	1.41955	0.00162816
NP_217265.1	Rv2749	hypothetical protein Rv2749	4	15.32	16.89	17.72	15.62	17.09	17.35	16.6433	16.6867	1.0026	0.963495
NP_217266.1	Rv2750	3-ketoacyl-(acyl-carrier-protein) reductase	1	18.6	17.19	17.25	15.28	16.37	15.31	17.68	15.6533	0.88537	0.0279981
NP_217267.1	Rv2751	hypothetical protein Rv2751	2	16.1	14.53	17.13	15.83	18.65	17.75	15.92	17.41	1.09359	0.256143
NP_217268.1	Rv2752c	hypothetical protein Rv2752c	6	14.21	16.4	17.22	15.68	17.65	18.83	15.9433	17.3867	1.09053	0.324246
NP_217269.1	Rv2753c	dihydrodipicolinate synthase	1	16.93	15.85	16.47	16.4	18.85	15.51	16.4167	16.92	1.03066	0.671054
NP_217270.1	Rv2754c	FAD-dependent thymidylate synthase	1	17.33	17.54	18.23	15.67	16.2	15.04	17.7	15.6367	0.883427	0.0097274
NP_217272.1	Rv2756c	type I restriction/modification system DNA methylase HsdM	12	13.93	12.74	13.68	19.25	20.77	19.62	13.45	19.88	1.47807	0.000506595
NP_217276.1	Rv2760c	hypothetical protein Rv2760c	3	15.46	16.62	13.71	17.59	16.5	20.12	15.2633	18.07	1.18388	0.112829
NP_217280.1	Rv2764c	thymidylate synthase	1	13.14	13.66	13.06	20.46	19.13	20.54	13.2867	20.0433	1.50853	0.00154516
NP_217289.1	Rv2773c	dihydrodipicolinate reductase	5	14.84	15.21	16.55	17.52	16.61	19.28	15.5333	17.8033	1.14614	0.0829392
NP_217291.1	Rv2775	hypothetical protein Rv2775	7	15.65	16.65	15.73	17.04	17.21	17.72	16.01	17.3233	1.08203	0.0337216
NP_217293.1	Rv2777c	hypothetical protein Rv2777c	3	7.88	7.43	9.67	22.05	26.6	26.36	8.32667	25.0033	3.0028	0.00258693
NP_217296.1	Rv2780	secreted L-alanine dehydrogenase ALD (40 kDa antigen) (TB43)	6	21.16	24.67	26.71	8.22	9.48	9.77	24.18	9.15667	0.378688	0.00742125
NP_217297.1	Rv2781c	alanine rich oxidoreductase	3	9.7	12.73	12.8	18.8	22.37	23.6	11.7433	21.59	1.83849	0.00683863
NP_217298.1	Rv2782c	zinc protease PEPR	3	17.68	18.02	22.81	12.97	14.42	14.1	19.5033	13.83	0.70911	0.0671256
NP_217299.1	Rv2783c	polynucleotide phosphorylase/polyadenylase	36	18.58	20.88	18.94	14.75	12.56	14.29	19.4667	13.8667	0.712329	0.00465558
NP_217300.1	Rv2784c	lipoprotein LppU	3	17.28	17.5	18.67	14.64	15.95	15.97	17.8167	15.52	0.871094	0.0203625
NP_217301.1	Rv2785c	30S ribosomal protein S15	5	22.66	20.29	15.93	15.28	12.6	13.24	19.6267	13.7067	0.69837	0.0793183
NP_217302.1	Rv2786c	bifunctional riboflavin kinase/FMN adenylyltransferase	1	14.27	16.05	15.47	17.75	17.77	18.69	15.2633	18.07	1.18388	0.0161227
NP_217304.1	Rv2788	transcriptional repressor SIRR	4	14.7	14.9	16.54	16.5	19.29	18.08	15.38	17.9567	1.16753	0.0669138
NP_217305.1	Rv2789c	acyl-CoA dehydrogenase FADE21	9	14.11	14.72	15.85	18.34	17.65	19.32	14.8933	18.4367	1.23791	0.00733908
NP_217306.1	Rv2790c	lipid-transfer protein	7	15.35	14.67	16.44	17.4	18.55	17.6	15.4867	17.85	1.1526	0.024206
NP_217307.1	Rv2791c	transposase	7	2.99	3.33	2.57	29.45	28.36	33.3	2.96333	30.37	10.2486	0.00250816
NP_217309.1	Rv2793c	tRNA pseudouridine synthase B	1	13.24	14.2	15.28	17.33	20.64	19.31	14.24	19.0933	1.34082	0.018795
NP_217310.1	Rv2794c	hypothetical protein Rv2794c	2	13.09	14.01	13.06	19.11	20.21	20.52	13.3867	19.9467	1.49004	0.000405096
NP_217311.1	Rv2795c	hypothetical protein Rv2795c	3	14.64	14.54	15.79	16.17	20.35	18.5	14.99	18.34	1.22348	0.0974066
NP_217317.1	Rv2801c	hypothetical protein Rv2801c	2	14.11	12.91	13.12	19.92	20.48	19.45	13.38	19.95	1.49103	0.000208523
NP_217324.1	Rv2808	hypothetical protein Rv2808	1	12	11.36	9.94	24.25	19.19	23.27	11.1	22.2367	2.0033	0.0104823
NP_217332.1	Rv2816c	hypothetical protein Rv2816c	1	8.28	10.61	9.14	22.27	23.95	25.74	9.34333	23.9867	2.56725	0.000542342
NP_217334.1	Rv2818c	hypothetical protein Rv2818c	7	17.27	20.02	19.76	14.79	11.62	16.53	19.0167	14.3133	0.752673	0.0610118
NP_217335.1	Rv2819c	hypothetical protein Rv2819c	5	14.04	12.6	14.29	18.78	20.72	19.57	13.6433	19.69	1.4432	0.00145501
NP_217336.1	Rv2820c	hypothetical protein Rv2820c	1	19.27	18.27	22.38	14.08	11.83	14.18	19.9733	13.3633	0.669059	0.0158271
NP_217337.1	Rv2821c	hypothetical protein Rv2821c	8	13.16	16.38	10.86	20.82	18.13	20.65	13.4667	19.8667	1.47525	0.0374028
NP_217339.1	Rv2823c	hypothetical protein Rv2823c	2	11.13	8.79	10.92	21.4	24.93	22.83	10.28	23.0533	2.24254	0.000849534
NP_217340.1	Rv2824c	hypothetical protein Rv2824c	2	15.4	16.34	19.27	15.31	16.86	16.82	17.0033	16.33	0.9604	0.636462
NP_217342.1	Rv2826c	hypothetical protein Rv2826c	1	14.45	14.81	20.66	15.04	16.31	18.73	16.64	16.6933	1.00321	0.982816
NP_217346.1	Rv2830c	hypothetical protein Rv2830c	3	10.18	8.69	9.47	22.18	25.93	23.54	9.44667	23.8833	2.52823	0.00225819
NP_217347.1	Rv2831	enoyl-CoA hydratase	7	17.99	17.1	17.76	15.85	16.26	15.04	17.6167	15.7167	0.892148	0.015536
NP_217349.1	Rv2833c	sn-glycerol-3-phosphate-binding lipoprotein UGPB	1	19.19	17.03	18.56	15.01	15.35	14.87	18.26	15.0767	0.825666	0.0331288
NP_217354.1	Rv2838c	ribosome-binding factor A	3	13.65	16.03	15.13	17.81	18.43	18.96	14.9367	18.4	1.23187	0.0224509
NP_217355.1	Rv2839c	translation initiation factor IF-2	40	15.78	15.49	16.41	16.79	18.01	17.52	15.8933	17.44	1.09732	0.0285673
NP_217357.1	Rv2841c	transcription elongation factor NusA	8	14.43	17.45	14.03	18.94	16.43	18.72	15.3033	18.03	1.17817	0.118405
NP_217361.1	Rv2845c	prolyl-tRNA synthetase	13	18.36	18.44	18.13	15.34	15.1	14.63	18.31	15.0233	0.820499	0.00110901
NP_217366.1	Rv2850c	magnesium chelatase	1	4.69	3.34	4.42	28.09	29.29	30.17	4.15	29.1833	7.03213	1.37323e-05
NP_217367.1	Rv2851c	hypothetical protein Rv2851c	3	14.74	15.63	15.5	18.44	17.63	18.06	15.29	18.0433	1.18007	0.00181316
NP_217368.1	Rv2852c	malate:quinone oxidoreductase	3	13.81	13.04	13.03	19.6	19.69	20.83	13.2933	20.04	1.50752	0.000348444
NP_217370.1	Rv2854	hypothetical protein Rv2854	1	18.48	16.49	19.01	15.47	16.13	14.42	17.9933	15.34	0.852538	0.0530509
YP_177910.1	Rv2855	mycothione reductase	5	17.35	18.26	20.59	13.87	14.74	15.2	18.7333	14.6033	0.779537	0.0361335
NP_217374.1	Rv2858c	aldehyde dehydrogenase	12	16.3	17.36	16.42	16.26	16.55	17.11	16.6933	16.64	0.996805	0.905061
NP_217375.1	Rv2859c	amidotransferase	1	16.33	18.17	17.99	14.81	14.78	17.92	17.4967	15.8367	0.905125	0.25491
NP_217376.1	Rv2860c	glutamine synthetase	2	13.48	17.12	18.36	15.84	17.82	17.39	16.32	17.0167	1.04269	0.693196
YP_177911.1	Rv2861c	methionine aminopeptidase	9	16.41	16.39	15.59	16.71	17.7	17.21	16.13	17.2067	1.06675	0.0521852
NP_217380.1	Rv2864c	penicillin-binding lipoprotein	1	20.53	23.28	19.69	13.3	10.71	12.49	21.1667	12.1667	0.574803	0.00359307
NP_217381.1	Rv2865	hypothetical protein Rv2865	1	8.13	11.81	13.76	19.39	19.53	27.39	11.2333	22.1033	1.96766	0.0334078
NP_217384.1	Rv2868c	4-hydroxy-3-methylbut-2-en-1-yl diphosphate synthase	6	15.4	15.67	15.45	17.91	17.23	18.33	15.5067	17.8233	1.1494	0.0140626
NP_217385.1	Rv2869c	transmembrane protein	9	17.69	16.6	17.75	15.74	16.14	16.07	17.3467	15.9833	0.921407	0.0558315
NP_217389.1	Rv2873	cell surface lipoprotein mpt83 (lipoprotein P23)	2	18.66	19.19	17.61	15.58	14.25	14.71	18.4867	14.8467	0.803101	0.00425421
NP_217398.1	Rv2882c	ribosome recycling factor	19	18.98	20.86	16.1	15.55	14.11	14.4	18.6467	14.6867	0.78763	0.0922042
NP_217399.1	Rv2883c	uridylate kinase	1	14.6	15.71	13.59	19.86	15.63	20.62	14.6333	18.7033	1.27813	0.105427
NP_217403.1	Rv2887	transcriptional regulatory protein	1	16.26	15.91	12.69	17.87	19.13	18.15	14.9533	18.3833	1.22938	0.0820264
NP_217405.1	Rv2889c	elongation factor Ts	56	19.43	20.07	20.37	13.33	13.54	13.25	19.9567	13.3733	0.670119	0.000765067
NP_217406.1	Rv2890c	30S ribosomal protein S2	29	20.18	19.01	20.36	12.66	14.86	12.93	19.85	13.4833	0.679261	0.00300941
NP_217411.1	Rv2895c	mycobactin utilization protein ViuB	4	18.63	18.73	17.48	15.06	15.29	14.81	18.28	15.0533	0.823487	0.00898229
NP_217416.1	Rv2900c	formate dehydrogenase H	2	9.6	7.03	8.37	25.8	22.43	26.77	8.33333	25	3	0.00126037
NP_217417.1	Rv2901c	hypothetical protein Rv2901c	5	15.27	15.19	17.11	16.48	18.43	17.52	15.8567	17.4767	1.10217	0.127821
NP_217419.1	Rv2903c	signal peptidase I LepB	5	19.56	17.35	17.31	15.9	15.1	14.78	18.0733	15.26	0.844338	0.0461046
NP_217420.1	Rv2904c	50S ribosomal protein L19	14	15.95	15.88	15.48	17.27	17.63	17.8	15.77	17.5667	1.11393	0.00112408
NP_217423.1	Rv2907c	16S rRNA-processing protein RimM	1	16.25	17.73	20.42	14.29	16.11	15.2	18.1333	15.2	0.838235	0.123659
NP_217425.1	Rv2909c	30S ribosomal protein S16	8	17.89	18.82	18.34	13.45	17.03	14.47	18.35	14.9833	0.81653	0.0792143
NP_217429.1	Rv2913c	D-amino acid aminohydrolase	2	12.58	15.82	11.42	23.05	17.1	20.04	13.2733	20.0633	1.51155	0.0382124
NP_217430.1	Rv2914c	transmembrane serine/threonine-protein kinase I	1	17.28	16.38	19.68	14.75	16.13	15.78	17.78	15.5533	0.874766	0.139057
NP_217432.1	Rv2916c	signal recognition particle protein	31	11.47	11.67	12.04	21.13	21.67	22.02	11.7267	21.6067	1.84252	2.31896e-05
NP_217433.1	Rv2917	hypothetical protein Rv2917	1	3.36	3.45	3.36	29.29	29.98	30.56	3.39	29.9433	8.83284	0.000174594
NP_217435.1	Rv2919c	nitrogen regulatory protein P-II GLNB	10	20.34	14.28	15.94	17.68	16.25	15.51	16.8533	16.48	0.977848	0.860361
NP_217437.1	Rv2921c	cell division protein FtsY	4	15.57	13.62	15.62	17.9	18.82	18.47	14.9367	18.3967	1.23164	0.0220542
YP_177679.1	Rv2922A	acylphosphatase	6	14.69	15.95	16.33	17.18	17.58	18.27	15.6567	17.6767	1.12902	0.0341001
NP_217438.2	Rv2922c	chromosome partition protein Smc	9	12.32	11.19	12.96	19.79	22.76	20.98	12.1567	21.1767	1.74198	0.00205891
NP_217441.1	Rv2925c	ribonuclease III	3	13.58	13.41	13.6	18.86	19.98	20.56	13.53	19.8	1.46341	0.00570474
NP_217442.1	Rv2926c	hypothetical protein Rv2926c	7	11.98	12.26	11.98	21.08	21.18	21.52	12.0733	21.26	1.76091	2.04074e-06
NP_217443.1	Rv2927c	hypothetical protein Rv2927c	7	17.07	16.61	17.11	16.01	17.02	16.18	16.93	16.4033	0.968892	0.230863
NP_217444.1	Rv2928	thioesterase TESA	8	19.52	19.04	19.77	13.23	14.39	14.05	19.4433	13.89	0.714384	0.000469232
NP_217446.2	Rv2930	acyl-CoA synthetase	12	16.7	17.89	19.89	13.5	16.55	15.48	18.16	15.1767	0.83572	0.0819244
NP_217447.1	Rv2931	phenolpthiocerol synthesis type-I polyketide synthase PPSA	4	16.31	16.52	18.25	15.41	17.02	16.5	17.0267	16.31	0.957909	0.411344
NP_217448.1	Rv2932	phenolpthiocerol synthesis type-I polyketide synthase PPSB	5	15.26	16.41	16.71	16.7	16.61	18.31	16.1267	17.2067	1.06697	0.204843
NP_217449.1	Rv2933	phenolpthiocerol synthesis type-I polyketide synthase PPSC	3	9.04	9.12	11.3	19.24	24.81	26.49	9.82	23.5133	2.39443	0.0166021
NP_217451.1	Rv2935	phenolpthiocerol synthesis type-I polyketide synthase PPSE	2	20.89	18.53	22.92	11.8	13.33	12.53	20.78	12.5533	0.604107	0.0148972
NP_217452.1	Rv2936	daunorubicin-DIM-transport ATP-binding protein ABC transporter DrrA	5	14.03	17.58	15.83	16.87	16.76	18.93	15.8133	17.52	1.10793	0.250507
NP_217455.1	Rv2939	acyltransferase PapA5	1	16.41	18.94	20.69	13.57	14.93	15.46	18.68	14.6533	0.78444	0.0656112
NP_217456.1	Rv2940c	multifunctional mycocerosic acid synthase membrane-associated MAS	13	17.67	17.98	19.55	14.81	14.59	15.39	18.4	14.93	0.811413	0.0160688
NP_217457.1	Rv2941	acyl-CoA synthetase	18	14.26	14.2	13.79	17.44	19.47	20.84	14.0833	19.25	1.36686	0.0322588
NP_217458.1	Rv2942	transmembrane transport protein MmpL7	1	14.29	13.47	11.78	22.77	17	20.69	13.18	20.1533	1.52908	0.037767
NP_217461.1	Rv2945c	lipoprotein LppX	6	21.57	22.06	19.27	12.35	12.5	12.24	20.9667	12.3633	0.589666	0.00942834
NP_217464.1	Rv2948c	acyl-CoA synthetase	6	14.51	17.19	18.28	16.04	15.64	18.33	16.66	16.67	1.0006	0.994664
NP_217465.1	Rv2949c	hypothetical protein Rv2949c	3	15.03	14.71	15.12	16.78	19.27	19.1	14.9533	18.3833	1.22938	0.0477254
NP_217466.2	Rv2950c	acyl-CoA synthetase	12	13.67	14.73	17.75	16.28	18.82	18.74	15.3833	17.9467	1.16663	0.16767
NP_217467.1	Rv2951c	oxidoreductase	6	17.65	17.22	18.39	15.48	16.31	14.95	17.7533	15.58	0.877582	0.0148159
NP_217469.1	Rv2953	hypothetical protein Rv2953	3	17.82	20.83	17.47	16.19	13.32	14.38	18.7067	14.63	0.782074	0.0425844
NP_217470.1	Rv2954c	hypothetical protein Rv2954c	1	10.87	14.52	16.99	15.28	21.51	20.84	14.1267	19.21	1.35984	0.129031
NP_217472.1	Rv2956	hypothetical protein Rv2956	4	19.93	16.64	21.45	12.98	14.98	14.02	19.34	13.9933	0.723544	0.0483899
NP_217475.1	Rv2959c	methyltransferase (methylase)	16	19.52	18.78	20.07	13.98	13.94	13.7	19.4567	13.8733	0.713038	0.00303394
NP_217481.1	Rv2965c	phosphopantetheine adenylyltransferase	6	17.08	20.3	18.66	14.24	14.65	15.07	18.68	14.6533	0.78444	0.0420581
NP_217483.1	Rv2967c	pyruvate carboxylase	7	16.66	15.67	20.56	14	17.48	15.62	17.63	15.7	0.890528	0.351745
NP_217485.1	Rv2969c	hypothetical protein Rv2969c	17	15.85	15.66	15.35	17.98	17.69	17.47	15.62	17.7133	1.13402	0.000543386
NP_217486.1	Rv2970c	lipase/esterase LipN	1	18.01	15.99	17.73	15.44	17.01	15.82	17.2433	16.09	0.933114	0.223155
NP_217495.1	Rv2979c	resolvase	1	2.21	1.39	1.85	31.31	30.59	32.64	1.81667	31.5133	17.3468	7.18746e-05
NP_217497.1	Rv2981c	D-alanyl-alanine synthetase A	2	16.55	17.7	19.38	14.5	15.92	15.96	17.8767	15.46	0.864814	0.0789586
NP_217498.1	Rv2982c	NAD(P)H-dependent glycerol-3-phosphate dehydrogenase	1	14.93	13.47	16.84	16.3	19.5	18.96	15.08	18.2533	1.21043	0.0844172
NP_217500.1	Rv2984	polyphosphate kinase	2	13.24	13.13	14.35	17.7	20.89	20.68	13.5733	19.7567	1.45555	0.0168413
NP_217501.1	Rv2985	hydrolase MutT1	2	15.08	13.38	16.39	18.7	18.73	17.72	14.95	18.3833	1.22965	0.0448656
NP_217502.1	Rv2986c	DNA-binding protein HU	21	14.63	19.56	15.21	16.2	17.39	17	16.4667	16.8633	1.02409	0.824857
NP_217503.1	Rv2987c	isopropylmalate isomerase small subunit	3	15.65	17.66	17.09	16.4	17.15	16.05	16.8	16.5333	0.984127	0.720646
NP_217504.1	Rv2988c	isopropylmalate isomerase large subunit	5	20.44	21.88	21.76	11.69	11.88	12.35	21.36	11.9733	0.560549	0.000616233
NP_217505.1	Rv2989	transcriptional regulatory protein	3	16.31	15.59	16.18	16.42	18.19	17.31	16.0267	17.3067	1.07987	0.113958
YP_177915.1	Rv2992c	glutamyl-tRNA synthetase	6	16.18	15.79	18.93	14.85	16.94	17.31	16.9667	16.3667	0.964637	0.6578
NP_217509.1	Rv2993c	2-hydroxyhepta-2,4-diene-1,7-dioate isomerase	5	16.53	18.68	17.43	17.21	14.12	16.03	17.5467	15.7867	0.899696	0.191973
NP_217511.1	Rv2995c	3-isopropylmalate dehydrogenase	7	17.09	17.73	16.99	15.95	16.13	16.11	17.27	16.0633	0.930129	0.0291077
YP_177916.1	Rv2996c	D-3-phosphoglycerate dehydrogenase	5	15.64	16.95	16.99	17.3	15.96	17.16	16.5267	16.8067	1.01694	0.672282
NP_217515.1	Rv2999	lipoprotein LppY	6	16.72	15.72	15.98	16.14	18.01	17.42	16.14	17.19	1.06506	0.190625
NP_217517.1	Rv3001c	ketol-acid reductoisomerase	47	17.79	18.73	19.33	14.54	14.18	15.42	18.6167	14.7133	0.790331	0.00289704
NP_217518.1	Rv3002c	acetolactate synthase 3 regulatory subunit	3	17.13	16.34	16.62	15.8	17.54	16.57	16.6967	16.6367	0.996406	0.921021
YP_177917.1	Rv3003c	acetolactate synthase 1 catalytic subunit	18	15.45	12.36	15.5	18.31	19.8	18.59	14.4367	18.9	1.30917	0.0342905
NP_217522.1	Rv3006	lipoprotein LppZ	8	11.51	13.38	13.06	19.1	20.66	22.3	12.65	20.6867	1.63531	0.00347938
NP_217525.1	Rv3009c	aspartyl/glutamyl-tRNA amidotransferase subunit B	8	15.43	16.66	15.79	18.64	16.11	17.37	15.96	17.3733	1.08855	0.183737
NP_217526.1	Rv3010c	6-phosphofructokinase	4	14.72	14.53	14.91	17.92	18.81	19.11	14.72	18.6133	1.26449	0.00490785
NP_217527.1	Rv3011c	aspartyl/glutamyl-tRNA amidotransferase subunit A	7	16.23	18.59	19.07	15.15	14.94	16.01	17.9633	15.3667	0.855446	0.0835664
NP_217530.1	Rv3014c	NAD-dependent DNA ligase LigA	12	15.88	16.05	17.3	16.49	17.68	16.6	16.41	16.9233	1.03128	0.432443
NP_217540.1	Rv3024c	tRNA-specific 2-thiouridylase MnmA	1	14.22	13.02	14.69	19.15	19.05	19.87	13.9767	19.3567	1.38493	0.00237668
NP_217544.1	Rv3028c	electron transfer flavoprotein subunit alpha	17	20.61	18.14	17.89	14.38	15.81	13.16	18.88	14.45	0.76536	0.019204
NP_217545.1	Rv3029c	electron transfer flavoprotein subunit beta	63	17.27	17.81	18.66	13.81	16.86	15.59	17.9133	15.42	0.860811	0.088855
NP_217547.1	Rv3031	hypothetical protein Rv3031	3	20.44	21.31	19.11	11.43	14.05	13.66	20.2867	13.0467	0.643115	0.00271357
NP_217549.1	Rv3033	hypothetical protein Rv3033	11	18.06	15.57	18.14	15.07	17.34	15.83	17.2567	16.08	0.931814	0.338422
NP_217550.1	Rv3034c	transferase	1	17.3	15.82	19.12	14.23	17.32	16.2	17.4133	15.9167	0.914051	0.31844
NP_217554.1	Rv3038c	hypothetical protein Rv3038c	4	15.54	15.77	15.98	18.04	16.26	18.41	15.7633	17.57	1.11461	0.107749
NP_217558.1	Rv3042c	phosphoserine phosphatase	1	17.05	17.89	18.84	15.41	15.3	15.5	17.9267	15.4033	0.859241	0.0380605
NP_217559.1	Rv3043c	cytochrome C oxidase polypeptide I	5	14.2	14.93	14.95	17.29	18.52	20.11	14.6933	18.64	1.2686	0.0314755
NP_217560.1	Rv3044	FEIII-dicitrate-binding periplasmic lipoprotein	2	14.14	14.75	14.9	18.34	18.66	19.22	14.5967	18.74	1.28385	0.000297242
NP_217561.1	Rv3045	NADP-dependent alcohol dehydrogenase ADHC	20	15.46	16.73	15.44	17.77	16.67	17.94	15.8767	17.46	1.09973	0.0536289
YP_177921.1	Rv3048c	ribonucleotide-diphosphate reductase subunit beta	9	21.93	21.88	26.04	9.63	10.61	9.91	23.2833	10.05	0.431639	0.00841065
NP_217565.1	Rv3049c	monooxygenase	4	14.76	15.08	16.83	18.04	16.98	18.31	15.5567	17.7767	1.1427	0.0533228
NP_217566.1	Rv3050c	AsnC family transcriptional regulator	1	12.54	18.43	16.21	13.29	20.85	18.68	15.7267	17.6067	1.11954	0.544973
NP_217567.1	Rv3051c	ribonucleotide-diphosphate reductase subunit alpha	53	9.56	8.04	9.52	23.17	25.34	24.37	9.04	24.2933	2.68732	6.45555e-05
NP_217568.1	Rv3052c	ribonucleotide reductase stimulatory protein	2	8.38	8.78	7.79	23.16	26.31	25.57	8.31667	25.0133	3.00762	0.0016327
NP_217569.1	Rv3053c	glutaredoxin electron transport protein NrdH	4	5.42	4.3	2.91	32.2	25.19	29.99	4.21	29.1267	6.91845	0.00332556
NP_217570.1	Rv3054c	hypothetical protein Rv3054c	5	7.71	8.14	7.25	25.28	23.88	27.75	7.7	25.6367	3.32944	0.00272064
NP_217573.1	Rv3057c	short chain dehydrogenase	2	15.94	14.11	15.63	17.27	17.85	19.2	15.2267	18.1067	1.18914	0.023141
NP_217577.1	Rv3061c	acyl-CoA dehydrogenase FADE22	4	14.21	14.61	16.11	17.73	17.1	20.23	14.9767	18.3533	1.22546	0.0502672
NP_217584.1	Rv3068c	phosphoglucomutase	4	17.78	20.61	17.22	16.72	13.21	14.47	18.5367	14.8	0.798418	0.0636307
NP_217587.1	Rv3071	hypothetical protein Rv3071	3	14.79	13.36	14.34	18.91	19.97	18.64	14.1633	19.1733	1.35373	0.00103202
NP_217591.1	Rv3075c	hypothetical protein Rv3075c	6	14.95	16.42	16.45	16.81	17.76	17.62	15.94	17.3967	1.09138	0.0789152
NP_217592.1	Rv3076	hypothetical protein Rv3076	1	18.37	18.66	17.39	15.34	14.55	15.68	18.14	15.19	0.837376	0.00468527
NP_217595.1	Rv3079c	hypothetical protein Rv3079c	1	16.69	18.85	16.86	17.3	14.5	15.79	17.4667	15.8633	0.908206	0.208491
NP_217599.1	Rv3083	monooxygenase	3	17.72	16.38	19.43	15.28	15.03	16.16	17.8433	15.49	0.868111	0.102241
NP_217600.1	Rv3084	acetyl-hydrolase/esterase LipR	1	22	19.89	19.33	12.25	13.47	13.06	20.4067	12.9267	0.633453	0.00484735
NP_217601.1	Rv3085	short-chain type dehydrogenase/reductase	2	14.73	14.09	17.43	14.49	19.39	19.87	15.4167	17.9167	1.16216	0.293628
NP_217602.1	Rv3086	zinc-type alcohol dehydrogenase AdhD	5	19.29	19.03	18.59	15.4	13.29	14.4	18.97	14.3633	0.75716	0.0106943
NP_217603.1	Rv3087	hypothetical protein Rv3087	1	17.9	14.23	18.38	17.12	17.02	15.35	16.8367	16.4967	0.979806	0.828821
NP_217604.1	Rv3088	hypothetical protein Rv3088	1	21.5	19.64	24.24	10.73	11.96	11.92	21.7933	11.5367	0.529367	0.0111787
NP_217605.1	Rv3089	chain-fatty-acid-CoA ligase	2	18.24	16.8	19.01	13.8	16.23	15.92	18.0167	15.3167	0.850139	0.0558309
NP_217606.1	Rv3090	hypothetical protein Rv3090	8	16.43	16.61	17.64	16.46	16.09	16.78	16.8933	16.4433	0.973362	0.367879
NP_217608.1	Rv3092c	integral membrane protein	2	15.09	14.76	15.66	17.62	17.67	19.19	15.17	18.16	1.1971	0.0143345
NP_217610.1	Rv3094c	hypothetical protein Rv3094c	1	18.09	19.25	21.6	13.12	14.37	13.57	19.6467	13.6867	0.696641	0.0193652
NP_217615.1	Rv3099c	hypothetical protein Rv3099c	1	14.85	15.53	18.82	15.49	16.43	18.89	16.4	16.9367	1.03272	0.753351
NP_217616.1	Rv3100c	SsrA-binding protein	1	16.13	17.74	16.96	17.55	14.94	16.68	16.9433	16.39	0.967342	0.577397
NP_217617.1	Rv3101c	putative cell division protein FTSX (septation component-transport integral membrane protein ABC transporter)	10	15.42	15.78	17.38	16.66	17.47	17.28	16.1933	17.1367	1.05825	0.254279
NP_217618.1	Rv3102c	putative cell division ATP-binding protein FTSE (septation component-transport ATP-binding protein ABC transporter)	19	17.78	16.16	17.65	15.5	16.59	16.33	17.1967	16.14	0.938554	0.173848
NP_217620.1	Rv3104c	transmembrane protein	2	14.12	13.04	12.99	19.96	20.39	19.5	13.3833	19.95	1.49066	0.000257914
NP_217621.1	Rv3105c	peptide chain release factor 2	5	14.1	13.16	15.78	18.22	19.43	19.31	14.3467	18.9867	1.32342	0.0129421
NP_217622.1	Rv3106	NADPH:adrenodoxin oxidoreductase FPRA (NADPH-ferredoxin reductase)	2	17.62	18.36	17.18	16.88	14.47	15.49	17.72	15.6133	0.881114	0.0757043
YP_177929.1	Rv3116	molybdenum cofactor biosynthesis protein MoeB	5	9.53	9.31	12.24	20.14	24.47	24.31	10.36	22.9733	2.2175	0.00300706
YP_177931.1	Rv3119	molybdenum cofactor biosynthesis protein E	2	11.41	15.88	10.94	24.77	15.3	21.7	12.7433	20.59	1.61575	0.0874705
NP_217646.1	Rv3130c	triacylglycerol synthase	3	9.56	9.12	11.07	20.74	24.7	24.81	9.91667	23.4167	2.36134	0.00379191
NP_217649.1	Rv3133c	two component transcriptional regulatory protein DevR	10	15.26	15.49	14.78	18.23	18.38	17.87	15.1767	18.16	1.19657	0.000530537
NP_217650.1	Rv3134c	hypothetical protein Rv3134c	1	19.36	17.77	17.93	14.39	16.2	14.36	18.3533	14.9833	0.816382	0.0140015
NP_217655.1	Rv3139	acyl-CoA dehydrogenase FADE24	28	19.45	19.58	21.88	12.35	13.64	13.1	20.3033	13.03	0.641767	0.00435532
NP_217656.1	Rv3140	acyl-CoA dehydrogenase FADE23	33	19.28	21.57	19.04	13.92	13.12	13.06	19.9633	13.3667	0.669561	0.00867234
NP_217657.1	Rv3141	NADPH quinone oxidoreductase	2	12.17	12.27	14.52	18.73	22.28	20.02	12.9867	20.3433	1.56648	0.00598234
NP_217658.1	Rv3142c	hypothetical protein Rv3142c	3	13.28	13.2	13.41	19.09	20.79	20.22	13.2967	20.0333	1.50664	0.00492654
NP_217662.1	Rv3146	NADH dehydrogenase subunit B	1	17.21	14.93	17.25	16.09	17.89	16.63	16.4633	16.87	1.0247	0.688287
NP_217663.1	Rv3147	NADH dehydrogenase subunit C	5	13.55	14.37	16.61	16.53	19.7	19.24	14.8433	18.49	1.24568	0.0540386
NP_217664.1	Rv3148	NADH dehydrogenase subunit D	10	17.23	16.07	18.2	15.52	16.64	16.34	17.1667	16.1667	0.941748	0.246429
NP_217666.1	Rv3150	NADH dehydrogenase I chain F	26	17.62	16.31	17.51	16.2	16.27	16.09	17.1467	16.1867	0.944012	0.147342
NP_217667.1	Rv3151	NADH dehydrogenase subunit G	13	16.8	16.61	18.04	15.96	15.72	16.88	17.15	16.1867	0.943829	0.17072
NP_217669.1	Rv3153	NADH dehydrogenase subunit I	3	16.49	15.35	16.65	15.95	18.11	17.45	16.1633	17.17	1.06228	0.266645
NP_217677.1	Rv3161c	dioxygenase	2	13.28	11.11	12.71	19.22	23	20.68	12.3667	20.9667	1.69542	0.00521848
NP_217683.1	Rv3167c	TetR family transcriptional regulator	1	14.93	13.69	15.31	19.24	19.41	17.42	14.6433	18.69	1.27635	0.00862403
NP_217689.1	Rv3173c	TetR/ACRR family transcriptional regulator	1	16.25	7.98	6.29	21.32	26.99	21.16	10.1733	23.1567	2.27621	0.0311196
NP_217704.1	Rv3188	hypothetical protein Rv3188	1	12.22	12.48	13.91	19.1	22.32	19.96	12.87	20.46	1.58974	0.00558901
NP_217706.1	Rv3190c	hypothetical protein Rv3190c	7	8.04	7.74	7.73	23.79	25.27	27.44	7.83667	25.5	3.25393	0.00333849
NP_217709.1	Rv3193c	hypothetical protein Rv3193c	21	13.78	13.29	14.87	19.14	19.85	19.07	13.98	19.3533	1.38436	0.00188631
NP_217710.1	Rv3194c	hypothetical protein Rv3194c	15	16.29	16.55	16.54	16.45	17.56	16.6	16.46	16.87	1.02491	0.359694
YP_177939.1	Rv3196A	hypothetical protein Rv3196A	1	18.88	17.34	17.19	14.2	15.96	16.43	17.8033	15.53	0.872309	0.0617504
NP_217713.1	Rv3197	ABC transporter ATP-binding protein	20	12.54	13.02	12.41	20.52	20.74	20.76	12.6567	20.6733	1.63339	8.81887e-05
YP_177941.1	Rv3198A	glutaredoxin protein	2	14.58	15.82	16.1	16.23	18.43	18.85	15.5	17.8367	1.15075	0.0831432
NP_217714.1	Rv3198c	ATP-dependent DNA helicase II UVRD2	1	12.36	12.08	12.82	19.19	22.07	21.48	12.42	20.9133	1.68384	0.00764774
NP_217719.1	Rv3203	lipase LipV	1	13.01	12.46	14.89	18.25	21.35	20.05	13.4533	19.8833	1.47795	0.00581897
YP_177942.1	Rv3206c	molybdopterin biosynthesis-like protein MoeZ	15	12.48	12.43	12.86	20.89	19.58	21.77	12.59	20.7467	1.64787	0.0044957
NP_217723.1	Rv3207c	hypothetical protein Rv3207c	2	20.28	16.13	19.12	14.5	16.22	13.75	18.51	14.8233	0.800828	0.0764288
NP_217724.1	Rv3208	TetR family transcriptional regulator	1	12.3	18.68	16.24	15.74	17.16	19.88	15.74	17.5933	1.11775	0.457829
NP_217727.1	Rv3211	ATP-dependent RNA helicase RhlE	8	14.71	18.17	13.02	20.75	14.08	19.27	15.3	18.0333	1.17865	0.344722
NP_217729.1	Rv3213c	SOJ/PARA-like protein	3	14.21	13.41	13.68	18.76	20.59	19.35	13.7667	19.5667	1.42131	0.0032516
NP_217731.1	Rv3215	isochorismate synthase	4	18.19	17.05	20.09	14.12	15.74	14.8	18.4433	14.8867	0.807157	0.0374251
NP_217735.1	Rv3219	transcriptional regulatory protein WHIB-like WHIB1	1	11.35	10.02	9.32	20.22	26.09	23	10.23	23.1033	2.25839	0.01017
NP_217736.1	Rv3220c	two component sensor kinase	6	17.17	15.89	17.84	15.99	15.59	17.53	16.9667	16.37	0.964833	0.508526
NP_217740.1	Rv3224	short chain dehydrogenase	25	19.42	17.64	17.77	14.61	15.74	14.82	18.2767	15.0567	0.823819	0.0137929
NP_217743.1	Rv3226c	hypothetical protein Rv3226c	4	12.38	12.4	12.92	20.41	20.65	21.23	12.5667	20.7633	1.65225	2.37091e-05
NP_217744.1	Rv3227	3-phosphoshikimate 1-carboxyvinyltransferase	1	14.55	14.79	17.71	16.43	18.77	17.74	15.6833	17.6467	1.12519	0.19342
NP_217745.1	Rv3228	hypothetical protein Rv3228	3	14.68	13.38	15.01	17.94	19.94	19.05	14.3567	18.9767	1.3218	0.0040326
NP_217749.1	Rv3232c	transcriptional regulatory protein PvdS	4	18.72	17.35	18.51	14.58	15.72	15.12	18.1933	15.14	0.832173	0.00573103
YP_177950.1	Rv3240c	preprotein translocase subunit SecA	60	13.51	12.52	13.46	19.63	20.34	20.55	13.1633	20.1733	1.53254	9.17515e-05
NP_217758.1	Rv3241c	hypothetical protein Rv3241c	5	10.25	9.44	9.19	22.48	25.43	23.21	9.62667	23.7067	2.4626	0.00161569
NP_217761.1	Rv3244c	lipoprotein LpqB	7	17.47	16.38	15.56	16.12	17.69	16.78	16.47	16.8633	1.02388	0.613192
NP_217763.1	Rv3246c	two component sensory transduction transcriptional regulatory protein MTRA	10	19.47	19.69	23.78	11.37	13.09	12.61	20.98	12.3567	0.588974	0.0162773
NP_217765.1	Rv3248c	S-adenosyl-L-homocysteine hydrolase	83	17.49	15.87	18.23	15.59	16.54	16.28	17.1967	16.1367	0.93836	0.264968
NP_217767.1	Rv3250c	rubredoxin RubB	3	14.71	24.98	21.66	11.59	11.15	15.92	20.45	12.8867	0.630155	0.113153
NP_217769.1	Rv3252c	transmembrane alkane 1-monooxygenase AlkB	1	22.37	17.96	21.99	11.75	13.76	12.17	20.7733	12.56	0.604621	0.0163024
NP_217779.1	Rv3262	F420-0--gamma-glutamyl ligase	2	18.47	18.94	19.6	14.43	13.68	14.87	19.0033	14.3267	0.753903	0.000619786
YP_177951.1	Rv3264c	D-alpha-D-mannose-1-phosphate guanylyltransferase MANB (D-alpha-D-heptose-1-phosphate guanylyltransferase)	3	17.1	18.82	17.86	15.33	15.31	15.59	17.9267	15.41	0.859613	0.0334288
NP_217784.1	Rv3267	hypothetical protein Rv3267	6	20.11	20.12	22.78	11.67	14.02	11.3	21.0033	12.33	0.58705	0.00215136
NP_217786.1	Rv3269	hypothetical protein Rv3269	24	20	19.65	20.8	13.35	13.5	12.69	20.15	13.18	0.654094	0.000141928
NP_217787.1	Rv3270	metal cation-transporting P-type ATPase C CtpC	6	17.08	20.21	19.08	14.44	14	15.19	18.79	14.5433	0.773993	0.0309151
NP_217789.1	Rv3272	hypothetical protein Rv3272	5	12.38	13.09	13.39	19.39	20.97	20.77	12.9533	20.3767	1.57308	0.000647775
NP_217790.1	Rv3273	transmembrane carbonic anhydrase	7	19.96	19.41	18.46	14.02	13.29	14.85	19.2767	14.0533	0.729033	0.00114894
NP_217791.1	Rv3274c	acyl-CoA dehydrogenase FADE25	44	17.95	19.28	18.9	14.39	14.93	14.56	18.71	14.6267	0.781757	0.00406181
NP_217792.1	Rv3275c	phosphoribosylaminoimidazole carboxylase catalytic subunit	2	19.01	16.88	19.05	14.16	17.17	13.72	18.3133	15.0167	0.819985	0.0736946
NP_217796.1	Rv3279c	biotin--protein ligase	3	16.38	14.85	16.91	16.14	18.86	16.86	16.0467	17.2867	1.07727	0.296001
NP_217797.1	Rv3280	propionyl-CoA carboxylase beta chain	32	16.64	15.23	16.99	16.31	17.95	16.89	16.2867	17.05	1.04687	0.350151
NP_217800.1	Rv3283	thiosulfate sulfurtransferase SseA	10	14.95	16.91	16.18	17.46	16.5	18	16.0133	17.32	1.0816	0.148854
NP_217802.1	Rv3285	bifunctional acetyl-/propionyl-coenzyme A carboxylase subunit alpha	25	15.94	16.06	17.52	15.6	17.17	17.71	16.5067	16.8267	1.01939	0.714321
YP_177953.1	Rv3293	piperideine-6-carboxilic acid dehydrogenase	1	13.89	17.25	18.79	15.51	15.37	19.19	16.6433	16.69	1.0028	0.981723
NP_217812.1	Rv3295	TetR family transcriptional regulator	1	15.8	15.6	17.51	16.65	17.58	16.86	16.3033	17.03	1.04457	0.360866
NP_217816.1	Rv3299c	arylsulfatase AtsB	8	13.22	12.46	12.19	20.76	21.2	20.18	12.6233	20.7133	1.64088	4.63441e-05
NP_217818.1	Rv3301c	phosphate transporter PhoU	1	13.84	17.08	16.3	17.56	14.33	20.9	15.74	17.5967	1.11796	0.448338
NP_217819.1	Rv3302c	glycerol-3-phosphate dehydrogenase	6	13.41	13.67	16.31	18.89	18.69	19.03	14.4633	18.87	1.30468	0.0401148
NP_217821.1	Rv3304	hypothetical protein Rv3304	4	16.21	18.58	17.74	15.19	16.67	15.61	17.51	15.8233	0.903674	0.121966
NP_217827.1	Rv3310	acid phosphatase	2	21.99	23.55	24.63	8.7	11.07	10.06	23.39	9.94333	0.42511	0.000212541
NP_217835.1	Rv3318	succinate dehydrogenase flavoprotein subunit	10	15.46	17.1	15.43	17.29	16.58	18.14	15.9967	17.3367	1.08377	0.136026
NP_217836.1	Rv3319	succinate dehydrogenase iron-sulfur subunit	13	16.28	17.63	16.26	17.61	15.49	16.74	16.7233	16.6133	0.993422	0.893093
YP_177959.1	Rv3323c	MOAD-MOAE fusion protein MOAX	1	16.06	17.25	17.27	16.68	16.71	16.03	16.86	16.4733	0.977066	0.457781
NP_217845.1	Rv3328c	RNA polymerase sigma factor SigJ	3	16.74	16.3	18.98	15.36	16.4	16.22	17.34	15.9933	0.922338	0.241278
NP_217846.1	Rv3329	hypothetical protein Rv3329	5	18.88	18.75	20.26	12.99	14.29	14.83	19.2967	14.0367	0.727414	0.00207067
NP_217847.1	Rv3330	penicillin-binding protein DacB1	3	21.46	24.14	26.86	8.82	9.14	9.57	24.1533	9.17667	0.379934	0.00959096
NP_217851.1	Rv3334	MerR family transcriptional regulator	2	2.62	3.82	2.15	31.86	22.77	36.79	2.86333	30.4733	10.6426	0.0201538
NP_217853.1	Rv3336c	tryptophanyl-tRNA synthetase	5	18.51	17.98	17.43	14.89	16.08	15.11	17.9733	15.36	0.854599	0.00595129
NP_217856.1	Rv3339c	isocitrate dehydrogenase	7	12.56	16.73	15.49	18.43	16.88	19.92	14.9267	18.41	1.23336	0.0903693
NP_217857.1	Rv3340	O-acetylhomoserine aminocarboxypropyltransferase	1	16.98	19.93	17.65	15.9	13.99	15.55	18.1867	15.1467	0.832845	0.0553392
YP_177962.1	Rv3345c	PE-PGRS family protein	2	14.72	16.11	18.12	18.6	14.51	17.95	16.3167	17.02	1.04311	0.685616
NP_217873.1	Rv3356c	bifunctional methylenetetrahydrofolate dehydrogenase/methenyltetrahydrofolate cyclohydrolase	3	17.4	15.84	16.29	16.55	17.06	16.86	16.51	16.8233	1.01898	0.575758
NP_217874.1	Rv3357	hypothetical protein Rv3357	2	14.87	16.06	13.13	19.61	16.03	20.29	14.6867	18.6433	1.26941	0.0761717
NP_217881.1	Rv3364c	hypothetical protein Rv3364c	1	20.25	17.35	17.64	16.58	15.03	13.15	18.4133	14.92	0.810282	0.0616661
NP_217882.1	Rv3365c	hypothetical protein Rv3365c	1	16.37	16.49	18.97	14.81	16.68	16.68	17.2767	16.0567	0.929385	0.315921
NP_217886.1	Rv3369	hypothetical protein Rv3369	4	14.57	15.47	15.11	17.84	17.55	19.46	15.05	18.2833	1.21484	0.0191298
NP_217889.1	Rv3372	trehalose 6-phosphate phosphatase	1	17.68	17.1	17.63	15.31	16.03	16.25	17.47	15.8633	0.908033	0.0129608
NP_217892.1	Rv3375	amidase AmiD	2	15.22	15.36	16.76	17.63	17.44	17.59	15.78	17.5533	1.11238	0.0670989
NP_217894.1	Rv3377c	cyclase	4	15.29	16.32	19.39	15.05	17.58	16.36	17	16.33	0.960588	0.669417
NP_217895.1	Rv3378c	hypothetical protein Rv3378c	1	9.84	8.88	11.2	20.92	24.61	24.55	9.97333	23.36	2.34225	0.00204755
NP_217906.1	Rv3389c	dehydrogenase	3	17.5	19.14	18.55	14.57	14.7	15.55	18.3967	14.94	0.812104	0.00617148
NP_217909.1	Rv3392c	cyclopropane-fatty-acyl-phospholipid synthase 1 CMAA1 (cyclopropane fatty acid synthase) (CFA synthase) (cyclopropane mycolic acid synthase 1)	12	14.97	16.64	17.09	16.37	17.3	17.62	16.2333	17.0967	1.05318	0.325855
NP_217913.1	Rv3396c	GMP synthase	8	17.75	17.6	17.41	16.04	14.87	16.32	17.5867	15.7433	0.895186	0.0476312
NP_217914.1	Rv3397c	phytoene synthase	1	13.04	12.85	13.08	20.22	20.08	20.74	12.99	20.3467	1.56633	0.000209337
NP_217917.1	Rv3400	hydrolase	10	15.38	19.34	15.69	17.89	14.79	16.9	16.8033	16.5267	0.983535	0.869175
NP_217920.1	Rv3403c	hypothetical protein Rv3403c	3	11.52	11.58	12.88	21.03	21.05	21.93	11.9933	21.3367	1.77904	0.000158737
NP_217921.1	Rv3404c	hypothetical protein Rv3404c	5	15.36	16.49	17.6	16.09	16.6	17.86	16.4833	16.85	1.02224	0.683642
NP_217922.1	Rv3405c	transcriptional regulatory protein	1	14.06	12.13	14.46	19.46	20.52	19.36	13.55	19.78	1.45978	0.00458843
NP_217923.1	Rv3406	dioxygenase	2	8.04	8.16	6.99	25.91	25.85	25.06	7.73	25.6067	3.31263	6.14109e-06
NP_217924.1	Rv3407	hypothetical protein Rv3407	3	12.05	13.43	12.44	18.5	21.31	22.28	12.64	20.6967	1.63739	0.0115982
NP_217925.1	Rv3408	hypothetical protein Rv3408	1	3.19	4.47	2.51	30.09	22.86	36.87	3.39	29.94	8.83186	0.0206883
NP_217926.1	Rv3409c	cholesterol oxidase precursor	9	17.26	15.76	17.67	15.72	16.89	16.7	16.8967	16.4367	0.972776	0.544936
NP_217927.1	Rv3410c	inosine 5-monophosphate dehydrogenase	1	17.35	21.48	13.03	19.67	12.34	16.12	17.2867	16.0433	0.928076	0.720214
NP_217928.1	Rv3411c	inosine 5'-monophosphate dehydrogenase	16	14.15	13.02	13.47	19.11	21.15	19.11	13.5467	19.79	1.46088	0.00427961
NP_217934.1	Rv3417c	chaperonin GroEL	156	16.48	17.28	16.25	17.15	16.16	16.68	16.67	16.6633	0.9996	0.988194
NP_217935.1	Rv3418c	co-chaperonin GroES	110	17.81	14.41	16.76	15.81	18.48	16.72	16.3267	17.0033	1.04145	0.625163
NP_217936.1	Rv3419c	putative DNA-binding/iron metalloprotein/AP endonuclease	3	16.23	15.3	16.74	17.61	17.07	17.05	16.09	17.2433	1.07168	0.095321
NP_217944.1	Rv3427c	transposase	1	13.7	13.27	12.38	17.65	21.67	21.33	13.1167	20.2167	1.5413	0.0235603
NP_217949.1	Rv3432c	glutamate decarboxylase GadB	3	17.69	18.68	18.93	14.63	14.46	15.62	18.4333	14.9033	0.808499	0.00254182
NP_217952.1	Rv3435c	transmembrane protein	1	17.51	15.16	17.19	15.77	18.22	16.15	16.62	16.7133	1.00562	0.933997
NP_217953.1	Rv3436c	glucosamine--fructose-6-phosphate aminotransferase	5	15.69	14.15	16.94	17.07	18.29	17.87	15.5933	17.7433	1.13788	0.100365
NP_217955.1	Rv3438	hypothetical protein Rv3438	6	16.09	14.96	17.16	17.29	16.43	18.08	16.07	17.2667	1.07447	0.211673
NP_217958.1	Rv3441c	phospho-sugar mutase / MRSA protein	1	16	16.62	22.74	12.7	16.82	15.13	18.4533	14.8833	0.806539	0.239167
NP_217959.1	Rv3442c	30S ribosomal protein S9	21	20.54	20.35	17.32	14.59	12.98	14.21	19.4033	13.9267	0.717746	0.0200922
NP_217960.1	Rv3443c	50S ribosomal protein L13	24	17.94	20.06	18.21	14.77	14.33	14.69	18.7367	14.5967	0.779043	0.0213725
NP_217968.2	Rv3451	cutinase precursor CUT3	1	12.64	13.7	12.49	22.07	16.64	22.46	12.9433	20.39	1.57533	0.0530535
NP_217973.1	Rv3456c	50S ribosomal protein L17	39	16.57	19.63	16.66	15.1	15.13	16.92	17.62	15.7167	0.891979	0.195216
NP_217974.1	Rv3457c	DNA-directed RNA polymerase subunit alpha	34	17.98	18.25	19.85	14.02	15.6	14.3	18.6933	14.64	0.783167	0.00650237
NP_217975.1	Rv3458c	30S ribosomal protein S4	36	17.51	18.07	18.57	14.82	14.9	16.12	18.05	15.28	0.846537	0.00769083
NP_217976.1	Rv3459c	30S ribosomal protein S11	18	14.03	17.44	13.5	19.13	17.32	18.58	14.99	18.3433	1.2237	0.0967872
NP_217977.1	Rv3460c	30S ribosomal protein S13	2	14.78	16.34	17.24	16.5	16.87	18.27	16.12	17.2133	1.06782	0.295281
NP_217978.1	Rv3461c	50S ribosomal protein L36	1	16.38	16.47	16.53	15.38	19.21	16.03	16.46	16.8733	1.02511	0.760284
NP_217981.1	Rv3464	dTDP-glucose 4,6-dehydratase RMLB	4	14.73	16.68	16.72	17.13	16.87	17.87	16.0433	17.29	1.07771	0.189194
NP_217997.1	Rv3480c	hypothetical protein Rv3480c	1	17.18	15.78	17.05	16.34	14.93	18.71	16.67	16.66	0.9994	0.993888
NP_218001.1	Rv3484	hypothetical protein Rv3484	4	17.17	17.9	18.55	15.7	15.03	15.64	17.8733	15.4567	0.864789	0.0121455
NP_218002.1	Rv3485c	short chain dehydrogenase	3	13.94	17.54	19.65	13.31	17.99	17.57	17.0433	16.29	0.955799	0.753632
NP_218007.1	Rv3490	alpha,alpha-trehalose-phosphate synthase	2	17.49	16.74	16.79	17.04	16.27	15.67	17.0067	16.3267	0.960016	0.231247
NP_218009.1	Rv3492c	Mce associated protein	5	17.35	15.95	19.03	15.57	15.98	16.12	17.4433	15.89	0.91095	0.220321
NP_218012.1	Rv3495c	MCE-family lipoprotein LprN	4	16.68	16.52	18.79	14.49	17.7	15.83	17.33	16.0067	0.923639	0.329478
NP_218013.1	Rv3496c	MCE-family protein MCE4D	3	17.54	15.34	17.97	15.75	17.66	15.73	16.95	16.38	0.966372	0.612973
NP_218014.1	Rv3497c	MCE-family protein MCE4C	1	20.75	15.95	18.76	13.92	16.46	14.16	18.4867	14.8467	0.803101	0.103028
NP_218015.1	Rv3498c	MCE-family protein MCE4B	1	12.74	14.96	15.23	18.32	18.17	20.57	14.31	19.02	1.32914	0.013104
YP_177977.1	Rv3499c	MCE-family protein MCE4A	6	15.73	16.16	16.74	16.37	17.51	17.5	16.21	17.1267	1.05655	0.132275
NP_218019.1	Rv3502c	3-ketoacyl-(acyl-carrier-protein) reductase	1	12.09	11.01	14.28	18.06	22.93	21.63	12.46	20.8733	1.67523	0.0120987
NP_218021.1	Rv3504	acyl-CoA dehydrogenase FADE26	2	17.07	17.36	21.43	12.45	17.42	14.27	18.62	14.7133	0.79019	0.125586
NP_218022.1	Rv3505	acyl-CoA dehydrogenase FADE27	1	17.37	17.43	15.01	17.07	15.94	17.18	16.6033	16.73	1.00763	0.896034
NP_218026.1	Rv3509c	hypothetical protein Rv3509c	4	15.77	18.19	23.13	12.39	14.95	15.57	19.03	14.3033	0.75162	0.147938
NP_218027.1	Rv3510c	hypothetical protein Rv3510c	1	19.92	21.25	21.06	12.35	13.07	12.36	20.7433	12.5933	0.607103	0.00030784
YP_177983.1	Rv3515c	acyl-CoA synthetase	8	14.87	14.45	15.77	18.35	17.68	18.88	15.03	18.3033	1.21779	0.00343862
NP_218033.1	Rv3516	enoyl-CoA hydratase	7	15.19	16.55	15.06	18.12	16.57	18.52	15.6	17.7367	1.13697	0.0512579
NP_218034.1	Rv3517	hypothetical protein Rv3517	1	11.14	14.08	15.23	18.93	20.34	20.29	13.4833	19.8533	1.47244	0.0233556
NP_218036.1	Rv3519	hypothetical protein Rv3519	3	13.06	13.32	12.18	19.17	21.99	20.27	12.8533	20.4767	1.5931	0.00504354
NP_218037.1	Rv3520c	coenzyme F420-dependent oxidoreductase	2	14.43	15.45	18.12	16.41	17.73	17.86	16	17.3333	1.08333	0.35382
NP_218043.1	Rv3526	oxidoreductase	5	14.29	8.17	10.1	26.2	19.81	21.44	10.8533	22.4833	2.07156	0.011644
NP_218045.1	Rv3528c	hypothetical protein Rv3528c	13	16.41	15.91	17.24	15.43	17.16	17.85	16.52	16.8133	1.01776	0.743023
NP_218047.1	Rv3530c	short chain dehydrogenase	1	11.57	14.2	14.16	18.97	18.47	22.62	13.31	20.02	1.50413	0.0173774
NP_218051.1	Rv3534c	4-hydroxy-2-ketovalerate aldolase	5	15.45	16.17	16.07	17.97	17.02	17.32	15.8967	17.4367	1.09688	0.0141401
NP_218052.1	Rv3535c	acetaldehyde dehydrogenase	2	16.36	15.56	15.85	17.84	17.03	17.37	15.9233	17.4133	1.09357	0.0108549
NP_218053.1	Rv3536c	hydratase	1	18.91	19.05	18.54	14.3	14.63	14.57	18.8333	14.5	0.769912	5.61753e-05
NP_218054.1	Rv3537	3-ketosteroid-delta-1-dehydrogenase	1	16.39	16.51	16.68	17.21	17	16.21	16.5267	16.8067	1.01694	0.458041
YP_177986.1	Rv3538	dehydrogenase	1	17.02	17.23	16.13	16.22	16.38	17.02	16.7933	16.54	0.984915	0.578788
NP_218060.1	Rv3543c	acyl-CoA dehydrogenase FADE29	1	14.58	21.83	14.48	16.83	12.8	19.48	16.9633	16.37	0.965023	0.858575
NP_218062.1	Rv3545c	cytochrome P450 125	6	18.7	19.7	23.2	12.24	13.78	12.38	20.5333	12.8	0.623377	0.0199704
NP_218064.1	Rv3547	hypothetical protein Rv3547	12	15.46	14.56	14.58	17.77	19	18.63	14.8667	18.4667	1.24215	0.00183221
NP_218065.1	Rv3548c	short chain dehydrogenase	3	16.18	11.52	16.43	17.8	18.45	19.63	14.71	18.6267	1.26626	0.122322
NP_218071.1	Rv3554	electron transfer protein FdxB	3	14.37	14.5	15.94	18.01	18.48	18.7	14.9367	18.3967	1.23164	0.0113824
NP_218073.1	Rv3556c	acetyl-CoA acetyltransferase	3	16.12	23.91	19.55	11.54	13.29	15.59	19.86	13.4733	0.678416	0.086424
NP_218078.1	Rv3561	acyl-CoA synthetase	1	17.54	17.06	17.17	15.61	16.92	15.71	17.2567	16.08	0.931814	0.0950794
NP_218079.1	Rv3562	acyl-CoA dehydrogenase FADE31	3	16.08	15.63	16.9	16.58	17.79	17.01	16.2033	17.1267	1.05698	0.146693
NP_218080.1	Rv3563	acyl-CoA dehydrogenase FADE32	1	15.92	16.25	16.74	16.18	17.92	16.99	16.3033	17.03	1.04457	0.286722
NP_218086.1	Rv3569c	2-hydroxy-6-oxo-6-phenylhexa-2,4-dienoate hydrolase BphD	3	15.89	14.95	16.73	16.52	16.46	19.45	15.8567	17.4767	1.10217	0.241116
NP_218087.1	Rv3570c	oxidoreductase	14	16.46	18.72	18.07	16.57	15.32	14.86	17.75	15.5833	0.877934	0.0665017
NP_218088.1	Rv3571	hemoglobine-like protein	4	17.42	18.37	17.22	15.61	15.69	15.69	17.67	15.6633	0.886437	0.0292665
NP_218089.1	Rv3572	hypothetical protein Rv3572	1	16.39	21.83	15.41	17.64	12.82	15.91	17.8767	15.4567	0.864628	0.383984
NP_218091.1	Rv3574	transcriptional regulatory protein TetR-family	3	14.08	13.23	16.02	18.14	19.77	18.76	14.4433	18.89	1.30787	0.0161351
NP_218092.1	Rv3575c	transcriptional regulatory protein LacI-family	2	17.45	19.78	19.54	14.37	14.52	14.34	18.9233	14.41	0.761494	0.0252885
YP_177991.1	Rv3576	lipoprotein LppH	1	19.39	16.98	15.01	14.87	18.89	14.86	17.1267	16.2067	0.946283	0.644292
YP_177992.1	Rv3580c	cysteinyl-tRNA synthetase	6	15.77	16.87	17.17	16.12	16.71	17.36	16.6033	16.73	1.00763	0.831325
NP_218100.1	Rv3583c	transcription factor, CarD	18	11.33	11.06	10.02	22.21	23.59	21.79	10.8033	22.53	2.08547	0.000116444
NP_218101.1	Rv3584	lipoprotein LpqE	7	20.57	18.18	19.57	13.71	15.14	12.83	19.44	13.8933	0.714678	0.00457194
NP_218104.1	Rv3587c	hypothetical protein Rv3587c	11	22.69	21.57	22.95	10.55	11.71	10.53	22.4033	10.93	0.487874	3.93514e-05
NP_218109.1	Rv3592	hypothetical protein Rv3592	7	16.32	15.6	16.79	16.85	17.52	16.92	16.2367	17.0967	1.05297	0.115677
NP_218110.1	Rv3593	lipoprotein LpqF	1	18.22	18.09	18.84	14.35	14.35	16.15	18.3833	14.95	0.813237	0.0186308
NP_218111.1	Rv3594	hypothetical protein Rv3594	2	14.79	14.65	17.2	17.33	18.55	17.48	15.5467	17.7867	1.14408	0.0966071
YP_177995.1	Rv3596c	ATP-dependent protease ATP-binding subunit ClpC1	76	12.16	11.4	11.25	22.36	21.56	21.27	11.6033	21.73	1.87274	2.30486e-05
NP_218115.1	Rv3598c	lysyl-tRNA synthetase	7	16.81	20.09	18.58	15.7	13.2	15.62	18.4933	14.84	0.802451	0.0445773
NP_218117.1	Rv3600c	pantothenate kinase	1	15.21	16.73	16.16	15.91	17.09	18.9	16.0333	17.3	1.079	0.285839
NP_218118.1	Rv3601c	aspartate alpha-decarboxylase	1	12.07	6.39	6.97	27.36	24.79	22.43	8.47667	24.86	2.93276	0.00249498
NP_218119.1	Rv3602c	pantoate--beta-alanine ligase	1	14	18.7	19.18	16.08	16.25	15.8	17.2933	16.0433	0.927718	0.52865
NP_218126.1	Rv3609c	GTP cyclohydrolase I	4	14.51	13.45	14.34	18.84	20.04	18.83	14.1	19.2367	1.3643	0.000706827
NP_218127.1	Rv3610c	membrane-bound protease FTSH (cell division protein)	10	13.41	11.83	14.53	17.91	22.35	19.97	13.2567	20.0767	1.51446	0.0161762
NP_218133.1	Rv3616c	hypothetical protein Rv3616c	1	19.07	20.85	19.59	10.22	15.85	14.42	19.8367	13.4967	0.68039	0.0534836
NP_218135.1	Rv3618	monooxygenase	1	20.05	21.6	25.16	10.84	11.1	11.25	22.27	11.0633	0.496782	0.0172417
NP_218140.1	Rv3623	lipoprotein LpqG	4	20.4	19.2	21.62	12.56	13.83	12.39	20.4067	12.9267	0.633453	0.00167471
NP_218143.1	Rv3626c	hypothetical protein Rv3626c	1	13.07	15.17	17.07	17.65	17.72	19.33	15.1033	18.2333	1.20724	0.0961028
NP_218144.1	Rv3627c	hypothetical protein Rv3627c	3	10.42	10.59	11.62	21.99	21.55	23.82	10.8767	22.4533	2.06436	0.000604618
NP_218145.1	Rv3628	inorganic pyrophosphatase	17	16.7	18.13	17.44	14.5	16.56	16.67	17.4233	15.91	0.913143	0.154812
NP_218148.1	Rv3631	transferase	5	16.14	15.45	19.99	14.5	17.2	16.73	17.1933	16.1433	0.93893	0.564355
NP_218161.1	Rv3644c	DNA polymerase III subunit delta'	3	11.9	13.89	16.11	15.9	20.77	21.43	13.9667	19.3667	1.38663	0.0713354
NP_218163.1	Rv3646c	DNA topoisomerase I	19	18.84	17.4	17.72	15.17	15.83	15.04	17.9867	15.3467	0.853225	0.0117959
NP_218165.1	Rv3648c	cold shock protein A	28	23.48	21.22	21.58	11.25	11.8	10.67	22.0933	11.24	0.508751	0.00106188
NP_218168.1	Rv3651	hypothetical protein Rv3651	4	13.01	14.1	14.91	20.19	17.4	20.39	14.0067	19.3267	1.37982	0.015182
NP_218178.1	Rv3661	hypothetical protein Rv3661	7	16.28	17.32	16.34	16.12	17.04	16.9	16.6467	16.6867	1.0024	0.932384
NP_218184.1	Rv3667	acetyl-CoA synthetase	3	17.73	17.82	17.94	14.92	15.54	16.04	17.83	15.5	0.869321	0.0161479
NP_218186.1	Rv3669	transmembrane protein	6	13.41	17.24	14.36	18.04	16.85	20.1	15.0033	18.33	1.22173	0.0921448
NP_218188.1	Rv3671c	membrane-associated serine protease	6	17.1	15.87	18.26	15.37	16.96	16.43	17.0767	16.2533	0.951786	0.386223
NP_218191.2	Rv3674c	endonuclease III	6	12.96	13.64	13.04	19.86	19.38	21.12	13.2133	20.12	1.5227	0.00201367
NP_218193.1	Rv3676	CRP/FNR family transcriptional regulator	14	19.15	20.51	18	14.4	14.2	13.74	19.22	14.1133	0.734305	0.0145899
NP_218195.1	Rv3678c	hypothetical protein Rv3678c	4	16.2	19.35	15.13	17.9	14.73	16.69	16.8933	16.44	0.973165	0.78807
NP_218196.1	Rv3679	anion transporter ATPase	10	17.33	17.5	17.13	16.32	16.03	15.68	17.32	16.01	0.924365	0.00720349
NP_218197.1	Rv3680	anion transporter ATPase	4	13.96	13.52	14.12	19.59	19.56	19.24	13.8667	19.4633	1.40361	5.18175e-05
YP_178005.1	Rv3682	bifunctional membrane-associated penicillin-binding protein 1A/1B	20	13.35	16.02	15.3	17.7	17.75	19.86	14.89	18.4367	1.23819	0.0300091
NP_218200.1	Rv3683	hypothetical protein Rv3683	3	10.68	10.49	12.24	19.6	22.66	24.34	11.1367	22.2	1.99342	0.00794107
NP_218204.1	Rv3687c	anti-anti-sigma factor RSFB (anti-sigma factor antagonist) (regulator of sigma F B)	2	14.84	15.92	14.55	20.69	15.45	18.55	15.1033	18.23	1.20702	0.16909
NP_218205.1	Rv3688c	hypothetical protein Rv3688c	15	14.31	14.98	16.19	17.46	17.9	19.15	15.16	18.17	1.19855	0.0159979
NP_218207.1	Rv3690	hypothetical protein Rv3690	1	17.79	16.24	18.05	14.71	17.09	16.13	17.36	15.9767	0.920315	0.198992
NP_218209.1	Rv3692	methanol dehydrogenase transcriptional regulatory protein MOXR2	3	23.41	12.7	16.35	18.57	14.92	14.05	17.4867	15.8467	0.906214	0.668422
NP_218213.1	Rv3696c	glycerol kinase	2	16.34	20.66	15.89	16.72	13.2	17.2	17.63	15.7067	0.890906	0.387116
NP_218216.1	Rv3699	hypothetical protein Rv3699	7	14.36	14.67	15.72	18.25	18.98	18.02	14.9167	18.4167	1.23464	0.00331862
NP_218219.1	Rv3702c	hypothetical protein Rv3702c	1	20.04	19.31	20.95	13.26	13.68	12.77	20.1	13.2367	0.658541	0.000870698
NP_218225.1	Rv3708c	aspartate-semialdehyde dehydrogenase	8	16.32	16.66	18.22	14.68	17.68	16.45	17.0667	16.27	0.95332	0.49547
NP_218226.1	Rv3709c	aspartate kinase	17	14.1	15.6	15.23	18.38	17.13	19.56	14.9767	18.3567	1.22568	0.0211446
NP_218227.2	Rv3710	2-isopropylmalate synthase	9	17.77	17.26	17.06	14.9	17.83	15.18	17.3633	15.97	0.919754	0.271694
NP_218229.1	Rv3712	ligase	2	17.63	20.1	19.45	15.26	13.59	13.98	19.06	14.2767	0.749038	0.00834192
NP_218232.1	Rv3715c	recombination protein RecR	1	13.55	12.95	15.13	17.43	21.5	19.44	13.8767	19.4567	1.40211	0.0234687
NP_218233.1	Rv3716c	hypothetical protein Rv3716c	7	18.41	21.19	19.22	12	15.59	13.58	19.6067	13.7233	0.699932	0.0127328
NP_218235.1	Rv3718c	hypothetical protein Rv3718c	8	17.25	16.08	17.74	14.13	18.63	16.18	17.0233	16.3133	0.958293	0.650387
NP_218236.1	Rv3719	hypothetical protein Rv3719	2	15.03	14.05	16.18	17.35	18.46	18.93	15.0867	18.2467	1.20946	0.0172614
NP_218237.1	Rv3720	fatty acid synthase	5	17.01	16.69	17.93	16.43	15.84	16.1	17.21	16.1233	0.936858	0.082094
NP_218239.2	Rv3722c	hypothetical protein Rv3722c	16	17.51	18.24	16.26	16.67	15.51	15.82	17.3367	16	0.922899	0.133956
NP_218243.1	Rv3726	dehydrogenase	6	17.91	17.43	17.62	17.71	13.2	16.13	17.6533	15.68	0.888218	0.273182
NP_218245.1	Rv3728	hypothetical protein Rv3728	1	12.53	11.15	15.36	16.84	22.11	22	13.0133	20.3167	1.56122	0.0313562
NP_218246.1	Rv3729	transferase	1	15.2	14.88	15.99	17.45	18.33	18.15	15.3567	17.9767	1.17061	0.00402082
NP_218248.1	Rv3731	ATP-dependent DNA ligase	2	16.76	16.82	18.45	17.29	15.09	15.59	17.3433	15.99	0.921968	0.195454
NP_218251.1	Rv3734c	hypothetical protein Rv3734c	4	19.44	18.84	22.33	12.4	14.26	12.74	20.2033	13.1333	0.650058	0.00981237
NP_218264.1	Rv3747	hypothetical protein Rv3747	7	15.52	19.39	17.54	16.4	15.17	15.98	17.4833	15.85	0.906578	0.278664
NP_218265.1	Rv3748	hypothetical protein Rv3748	1	17.01	16.72	20.21	14.59	16.37	15.1	17.98	15.3533	0.853912	0.128431
NP_218271.1	Rv3754	prephenate dehydrogenase	2	16.56	19.51	19.77	14.8	13.97	15.39	18.6133	14.72	0.790831	0.0482483
NP_218272.1	Rv3755c	hypothetical protein Rv3755c	2	16.09	16.51	12.56	17.43	19.19	18.23	15.0533	18.2833	1.21457	0.108486
NP_218273.1	Rv3756c	osmoprotectant (glycine betaine/carnitine/choline/L-proline) transport integral membrane protein ABC transporter PROZ	1	13.89	14.08	14.79	18.67	19.2	19.38	14.2533	19.0833	1.33887	0.000221733
NP_218275.1	Rv3758c	osmoprotectant (glycine betaine/carnitine/choline/L-proline) transport ATP-binding protein ABC transporter PROV	5	13.55	13.12	13.22	19.84	19.69	20.59	13.2967	20.04	1.50714	0.000299868
NP_218276.1	Rv3759c	osmoprotectant (glycine betaine/carnitine/choline/L-proline) binding lipoprotein PROX	5	14.14	13.73	13.45	18.8	20.5	19.38	13.7733	19.56	1.42014	0.0030245
NP_218278.1	Rv3761c	acyl-CoA dehydrogenase	2	15.97	17.45	17.75	15.86	15.77	17.21	17.0567	16.28	0.954466	0.343456
NP_218279.1	Rv3762c	hydrolase	2	12.82	12.25	14.74	19.29	20.65	20.25	13.27	20.0633	1.51193	0.0038593
NP_218280.1	Rv3763	19 kDa lipoprotein antigen precursor LPQH	14	19.19	20.54	19.57	14.07	13.55	13.09	19.7667	13.57	0.686509	0.000420807
NP_218282.1	Rv3765c	two component transcriptional regulatory protein	3	10.63	10.05	11.65	21.76	22.95	22.96	10.7767	22.5567	2.0931	5.25082e-05
NP_218285.1	Rv3768	hypothetical protein Rv3768	3	9.69	10.5	10.25	22.52	22.28	24.76	10.1467	23.1867	2.28515	0.0018789
NP_218286.1	Rv3769	hypothetical protein Rv3769	2	8.93	4.21	3.17	24.31	28.88	30.49	5.43667	27.8933	5.13059	0.0009428
NP_218290.1	Rv3773c	hypothetical protein Rv3773c	1	16.17	17.06	14.67	18.64	15.93	17.54	15.9667	17.37	1.08789	0.253845
NP_218291.1	Rv3774	enoyl-CoA hydratase	16	15.72	19.41	17.53	16.19	14.26	16.88	17.5533	15.7767	0.898785	0.256143
NP_218292.1	Rv3775	lipase LipE	1	19.17	16.8	19.86	14.34	15.15	14.69	18.61	14.7267	0.791331	0.045248
NP_218294.1	Rv3777	oxidoreductase	3	14.38	16.32	15.81	18.6	15.62	19.27	15.5033	17.83	1.15008	0.162728
NP_218298.1	Rv3781	o-antigen/lipopolysaccharide transport ATP-binding protein ABC transporter RfbE	1	15.37	16.03	16.42	17.35	18.32	16.5	15.94	17.39	1.09097	0.0915095
YP_178015.1	Rv3784	dTDP-glucose 4,6-dehydratase	1	18.02	14.44	16.21	17.39	16.78	17.17	16.2233	17.1133	1.05486	0.481095
NP_218307.1	Rv3790	oxidoreductase	5	17.95	17.66	19	14.41	15.58	15.41	18.2033	15.1333	0.83135	0.00511826
NP_218308.1	Rv3791	short chain dehydrogenase	4	18.42	17.2	18.14	15.42	15.47	15.36	17.92	15.4167	0.860305	0.0203962
NP_218310.1	Rv3793	integral membrane indolylacetylinositol arabinosyltransferase EmbC (arabinosylindolylacetylinositol synthase)	2	18.1	16.74	18.96	13.93	17.68	14.59	17.9333	15.4	0.858736	0.147576
NP_218311.1	Rv3794	integral membrane indolylacetylinositol arabinosyltransferase EMBA (arabinosylindolylacetylinositol synthase)	5	18.56	20.15	17.46	16.23	12.88	14.72	18.7233	14.61	0.78031	0.0317816
NP_218312.1	Rv3795	integral membrane indolylacetylinositol arabinosyltransferase EMBB (arabinosylindolylacetylinositol synthase)	5	18.15	15.45	19.64	15.09	16.02	15.64	17.7467	15.5833	0.878099	0.215894
YP_178016.1	Rv3796	hypothetical protein Rv3796	6	15.55	17.71	19.84	13.95	16.6	16.35	17.7	15.6333	0.883239	0.248918
NP_218314.1	Rv3797	acyl-CoA dehydrogenase FADE35	5	17.54	19.46	20.76	14.12	12.82	15.3	19.2533	14.08	0.731302	0.0136114
NP_218316.2	Rv3799c	propionyl-CoA carboxylase beta chain	21	14.52	16.2	16.9	17.87	15.93	18.58	15.8733	17.46	1.09996	0.210062
NP_218317.1	Rv3800c	polyketide synthase PKS13	25	17.31	16.7	19.79	14.83	15.61	15.76	17.9333	15.4	0.858736	0.105039
NP_218318.1	Rv3801c	acyl-CoA synthetase	38	17.93	17.42	19.17	14.53	15.29	15.67	18.1733	15.1633	0.834373	0.012151
YP_178017.1	Rv3803c	secreted MPT51/MPB51 antigen protein FBPD (MPT51/MPB51 antigen 85 complex C) (AG58C) (Mycolyl transferase 85C) (fibronectin-binding protein C) (85C)	2	22.97	20.34	18.36	14.03	13.66	10.64	20.5567	12.7767	0.621534	0.0116424
NP_218321.1	Rv3804c	secreted antigen 85-A FBPA (Mycolyl transferase 85A) (fibronectin-binding protein A) (antigen 85 complex A)	47	19.48	19.6	20.49	13.57	13.96	12.89	19.8567	13.4733	0.678529	0.000139182
NP_218322.1	Rv3805c	transmembrane protein	2	15.54	15.05	19.57	15.52	18.08	16.24	16.72	16.6133	0.99362	0.951649
NP_218323.1	Rv3806c	phosphoribose diphosphate:decaprenyl-phosphate phosphoribosyltransferase	2	19.41	16.74	19.37	14.9	14.72	14.86	18.5067	14.8267	0.801153	0.0525753
NP_218325.1	Rv3808c	bifunctional UDP-galactofuranosyl transferase GLFT	13	18.5	18.53	21.71	12.37	14.67	14.23	19.58	13.7567	0.702588	0.0143373
NP_218326.1	Rv3809c	UDP-galactopyranose mutase Glf	5	21.36	20.73	20.29	12.79	12.56	12.27	20.7933	12.54	0.603078	0.000205791
NP_218330.1	Rv3813c	hypothetical protein Rv3813c	1	15.13	16.89	15.29	17.46	17.04	18.2	15.77	17.5667	1.11393	0.0646163
NP_218331.1	Rv3814c	acyltransferase	3	8.65	8.4	9.02	22.29	26.3	25.34	8.69	24.6433	2.83583	0.00491054
NP_218332.1	Rv3815c	acyltransferase	1	6.69	11.95	11.1	26.22	16.93	27.11	9.91333	23.42	2.36247	0.0351454
NP_218333.1	Rv3816c	acyltransferase	4	12.71	13.65	13.35	19.78	18.86	21.65	13.2367	20.0967	1.51826	0.00837835
NP_218335.1	Rv3818	hypothetical protein Rv3818	6	14.86	15.34	15.41	17.51	17.51	19.36	15.2033	18.1267	1.19228	0.0338523
NP_218336.1	Rv3819	hypothetical protein Rv3819	8	16.12	13.93	13.84	19.34	18.5	18.27	14.63	18.7033	1.27842	0.0190509
YP_178020.1	Rv3820c	polyketide synthase associated protein PapA2	1	19.26	20.07	19.57	13.31	14.18	13.6	19.6333	13.6967	0.697623	7.24464e-05
NP_218341.1	Rv3824c	polyketide synthase associated protein	2	19.15	22.58	22.9	10.77	11.64	12.97	21.5433	11.7933	0.547424	0.0052827
NP_218342.1	Rv3825c	polyketide synthase PKS2	2	23.03	20.88	26.02	9.45	10.03	10.59	23.31	10.0233	0.430001	0.00966006
NP_218343.1	Rv3826	acyl-CoA synthetase	7	17.67	19.26	21.1	13.78	13.69	14.5	19.3433	13.99	0.723247	0.0264184
NP_218351.1	Rv3834c	seryl-tRNA synthetase	6	18.06	16.34	18.34	15.3	16.46	15.51	17.58	15.7567	0.896284	0.080542
NP_218352.1	Rv3835	hypothetical protein Rv3835	1	16.22	19.65	17.23	16.44	13.69	16.77	17.7	15.6333	0.883239	0.216788
NP_218358.1	Rv3841	bacterioferritin BfrB	2	18.34	18.77	15.2	15.1	15.92	16.67	17.4367	15.8967	0.91168	0.304885
NP_218359.1	Rv3842c	glycerophosphoryl diester phosphodiesterase	2	13.43	13.64	15.01	18.03	19.98	19.92	14.0267	19.31	1.37666	0.00351237
NP_218363.1	Rv3846	superoxide dismutase [Fe] SODA	22	19.64	19.65	19.5	12.84	14.72	13.66	19.5967	13.74	0.70114	0.00813256
NP_218366.1	Rv3849	hypothetical protein Rv3849	6	17.66	21.37	21.08	11.35	13.59	14.95	20.0367	13.2967	0.663617	0.0136589
NP_218367.1	Rv3850	hypothetical protein Rv3850	6	12.48	15.39	13.58	18.69	19.34	20.53	13.8167	19.52	1.41279	0.00773889
NP_218369.1	Rv3852	histone-like protein HNS	2	7.63	11.74	8.84	22.26	22.42	27.1	9.40333	23.9267	2.54449	0.00244533
NP_218371.1	Rv3854c	monooxygenase ETHA	9	16.34	17.93	16.99	15.79	15.42	17.52	17.0867	16.2433	0.950644	0.354385
NP_218373.1	Rv3856c	hypothetical protein Rv3856c	1	11.88	13.07	13.66	19.63	20.93	20.83	12.87	20.4633	1.59	0.000447526
NP_218375.1	Rv3858c	glutamate synthase subunit beta	5	19.91	17.92	18.67	14.02	15.11	14.39	18.8333	14.5067	0.770265	0.00650491
NP_218376.1	Rv3859c	ferredoxin-dependent glutamate synthase [NADPH] large subunit	33	16.44	17.71	21.86	13.73	14.51	15.76	18.67	14.6667	0.785574	0.121868
NP_218381.1	Rv3864	hypothetical protein Rv3864	11	15.43	15.77	16.59	17.26	17.61	17.34	15.93	17.4033	1.09249	0.0407069
NP_218382.1	Rv3865	hypothetical protein Rv3865	5	15.65	18.38	14.8	19.21	15.86	16.1	16.2767	17.0567	1.04792	0.636282
NP_218384.1	Rv3867	hypothetical protein Rv3867	5	14.69	16.15	16.85	15.14	19.58	17.59	15.8967	17.4367	1.09688	0.363051
NP_218385.1	Rv3868	hypothetical protein Rv3868	10	14.14	15.68	15.96	18.15	16.58	19.49	15.26	18.0733	1.18436	0.0580976
NP_218386.1	Rv3869	hypothetical protein Rv3869	1	16.61	16.51	17	16.65	16.54	16.68	16.7067	16.6233	0.995012	0.638823
NP_218387.1	Rv3870	transmembrane protein	19	14.39	13.64	14.85	19	19.68	18.44	14.2933	19.04	1.33209	0.000703353
NP_218388.1	Rv3871	hypothetical protein Rv3871	7	14.96	16.28	16.5	17.32	16.89	18.05	15.9133	17.42	1.09468	0.0694684
YP_178022.1	Rv3873	PPE family protein	2	17.77	25.33	26.87	9.7	9.57	10.76	23.3233	10.01	0.429184	0.0397267
NP_218391.1	Rv3874	10 kDa culture filtrate antigen EsxB	2	10.14	11.98	9.88	20.72	21.91	25.37	10.6667	22.6667	2.125	0.00526361
YP_178023.1	Rv3875	6 kDa early secretory antigenic target ESXA (ESAT-6)	10	9.93	10.99	11.66	20.25	19.4	27.76	10.86	22.47	2.06906	0.0443119
NP_218393.1	Rv3876	hypothetical protein Rv3876	4	16.44	17.06	16.43	16.91	17.31	15.84	16.6433	16.6867	1.0026	0.934796
NP_218395.1	Rv3878	hypothetical protein Rv3878	2	13.44	14.36	12.58	20.75	19.94	18.93	13.46	19.8733	1.47647	0.000956345
NP_218396.1	Rv3879c	hypothetical protein Rv3879c	3	11.91	12.62	14.2	19.68	20.78	20.8	12.91	20.42	1.58172	0.00201049
NP_218398.1	Rv3881c	hypothetical protein Rv3881c	19	12.68	14.39	12.58	18.47	19.09	22.79	13.2167	20.1167	1.52207	0.0224909
NP_218400.1	Rv3883c	membrane-anchored mycosin MYCP1 (serine protease) (subtilisin-like protease) (subtilase-like) (mycosin-1)	1	16.64	17.06	16.74	16.99	16.23	16.35	16.8133	16.5233	0.982752	0.356528
NP_218401.1	Rv3884c	CBXX/CFQX family protein	1	8.58	6.96	8.43	24.73	25.42	25.88	7.99	25.3433	3.17188	3.55522e-05
NP_218403.1	Rv3886c	alanine and proline rich membrane-anchored mycosin	2	16.13	19.71	14.52	18.61	13.92	17.11	16.7867	16.5467	0.985703	0.91314
NP_218404.1	Rv3887c	transmembrane protein	2	19.69	17.21	15.24	17.91	15.2	14.75	17.38	15.9533	0.917913	0.431918
NP_218405.1	Rv3888c	hypothetical protein Rv3888c	9	18.85	16.34	18.85	14.35	16.16	15.46	18.0133	15.3233	0.850666	0.0638096
NP_218411.1	Rv3894c	hypothetical protein Rv3894c	3	16.55	15.43	17.76	15.52	17.72	17.01	16.58	16.75	1.01025	0.864475
YP_178026.1	Rv3907c	poly(A) polymerase	6	16.68	17.28	16.26	17.62	15.03	17.13	16.74	16.5933	0.991239	0.875459
NP_218427.1	Rv3910	transmembrane protein	1	14.73	16.47	15.21	18.7	16.69	18.21	15.47	17.8667	1.15492	0.0408635
NP_218431.1	Rv3914	thioredoxin trxC (TRX) (MPT46)	12	13.8	16.84	15.67	17.7	16.56	19.42	15.4367	17.8933	1.15914	0.113391
YP_178027.1	Rv3915	hydrolase	3	12.42	12	13.3	19.93	22.37	19.97	12.5733	20.7567	1.65085	0.00332836
NP_218433.1	Rv3916c	hypothetical protein Rv3916c	2	16.76	17.58	20.65	11.54	17.83	15.65	18.33	15.0067	0.818694	0.2159
NP_218435.2	Rv3917c	chromosome partitioning protein ParB	2	19.76	21.98	17.63	14.28	13.15	13.2	19.79	13.5433	0.684352	0.0299644
NP_218434.2	Rv3918c	chromosome partitioning protein ParA	8	18.16	17.88	21.62	12.42	15.12	14.79	19.22	14.11	0.734131	0.0303022
NP_218437.1	Rv3920c	hypothetical protein Rv3920c	3	21.15	19.76	19.78	13.1	14.25	11.95	20.23	13.1	0.647553	0.0015202
NP_218438.1	Rv3921c	putative inner membrane protein translocase component YidC	6	16.12	15.75	18.64	16	16.47	17.01	16.8367	16.4933	0.979608	0.748023
NP_218439.1	Rv3922c	hypothetical protein Rv3922c	1	11.12	11.14	12.38	18.34	24.73	22.3	11.5467	21.79	1.88712	0.0267369
