# Supplementary material for: Post-Translational Regulation via Clp Protease Is Critical for Survival of Mycobacterium tuberculosis
Source: PLoS Pathog. 2014 Mar 6;10(3):e1003994. doi: 10.1371/journal.ppat.1003994 (PMC3946367; doi:10.1371/journal.ppat.1003994)
Supplement: Table S3 — List of orthologous proteins in Mtb and Msm found through proteomic screening for Clp protease substrates. Potential Clp substrates identified through Mtb and Msm screens were cross-referenced and 10 orthologous proteins were identified as potential Clp substrates in both species. Potential substrates in Mtb were defined as proteins that showed a greater than two-fold over-abundance in Clp-depleted strains compared to wildtype strains, with a p-value of less than 0.01 as measured by t-test grouping replicates. Potential substrates in Msm were defined as proteins that showed no difference prior to Clp depletion, but then showed a greater than two-fold overabundance in the Clp-depleted strain compared to the wildtype strain after 5 hours of depletion. (XLSX) [file ppat.1003994.s007.xlsx]

## Sheet: Sheet2
TABLE S3. Orthologous proteins in Mtb and Msm found through proteomic screening for Clp protease substrates
Mtb Rv no.	Mtb annotation	Mtb mut/wt ratio	Msm MSMEG no.	Msm annotation	Msm mut/wt ratio
Rv0251c	heat shock protein hsp (heat-stress-induced ribosome-binding protein A) Hsp20	75.9231	MSMEG_0424	Hsp20/alpha crystallin family protein	8.298
Rv2218	lipoyl synthase	3.61681	MSMEG_4286	lipoyl synthase	2.322
Rv2900c	formate dehydrogenase H	3	MSMEG_4668	oxidoreductase alpha (molybdopterin) subunit	5.16
Rv0058	replicative DNA helicase	2.64661	MSMEG_6892	replicative DNA helicase	2.352
Rv3241c	hypothetical protein Rv3241c	2.4626	MSMEG_1878	S30AE family protein	2.455
Rv1633	excinuclease ABC subunit B	2.32635	MSMEG_3816	excinuclease ABC subunit B	2.206
Rv1265	hypothetical protein Rv1265	2.27729	MSMEG_5010	hypothetical protein MSMEG_5010	2.436
Rv3219	transcriptional regulatory protein WHIB-like WHIB1	2.26	MSMEG_1919	transcription factor WhiB	6.733
Rv3583c	transcription factor, CarD	2.08547	MSMEG_6077	transcriptional regulator, CarD family protein	2.665
Rv0352	chaperone protein DnaJ1	2.02847	MSMEG_0711	chaperone protein DnaJ	2.029
